# Supplementary material for: Lewis Acid-Catalyzed 2,3-Dihydrofuran Acetal Ring-Opening Benzannulations toward Functionalized 1-Hydroxycarbazoles
Source: MDPI journal article supplement (doi:10.3390/molecules27238344), 2022-11-30

**Supporting Information**

**for**

**Lewis Acid-catalyzed 2,3-Dihydrofuran Acetal Ring-Opening Benzannulations  
Toward Functionalized 1-Hydroxycarbazoles**

**Shaoren Yuan<sup>1</sup>, Gabriel Guerra Faura<sup>1</sup>, Hailey E. Archeart<sup>1</sup>, Natalie Peulen<sup>1</sup>, and  
Stefan France<sup>1,2,\*</sup>**

<sup>1</sup> School of Chemistry and Biochemistry, Georgia Institute of Technology, Atlanta, Georgia, 30332, United States

<sup>2</sup> Petit Institute for Bioengineering and Bioscience, Georgia Institute of Technology, Atlanta, Georgia, 30332; United States

\* Correspondence: stefan.france@chemistry.gatech.edu

**NMR Spectra**

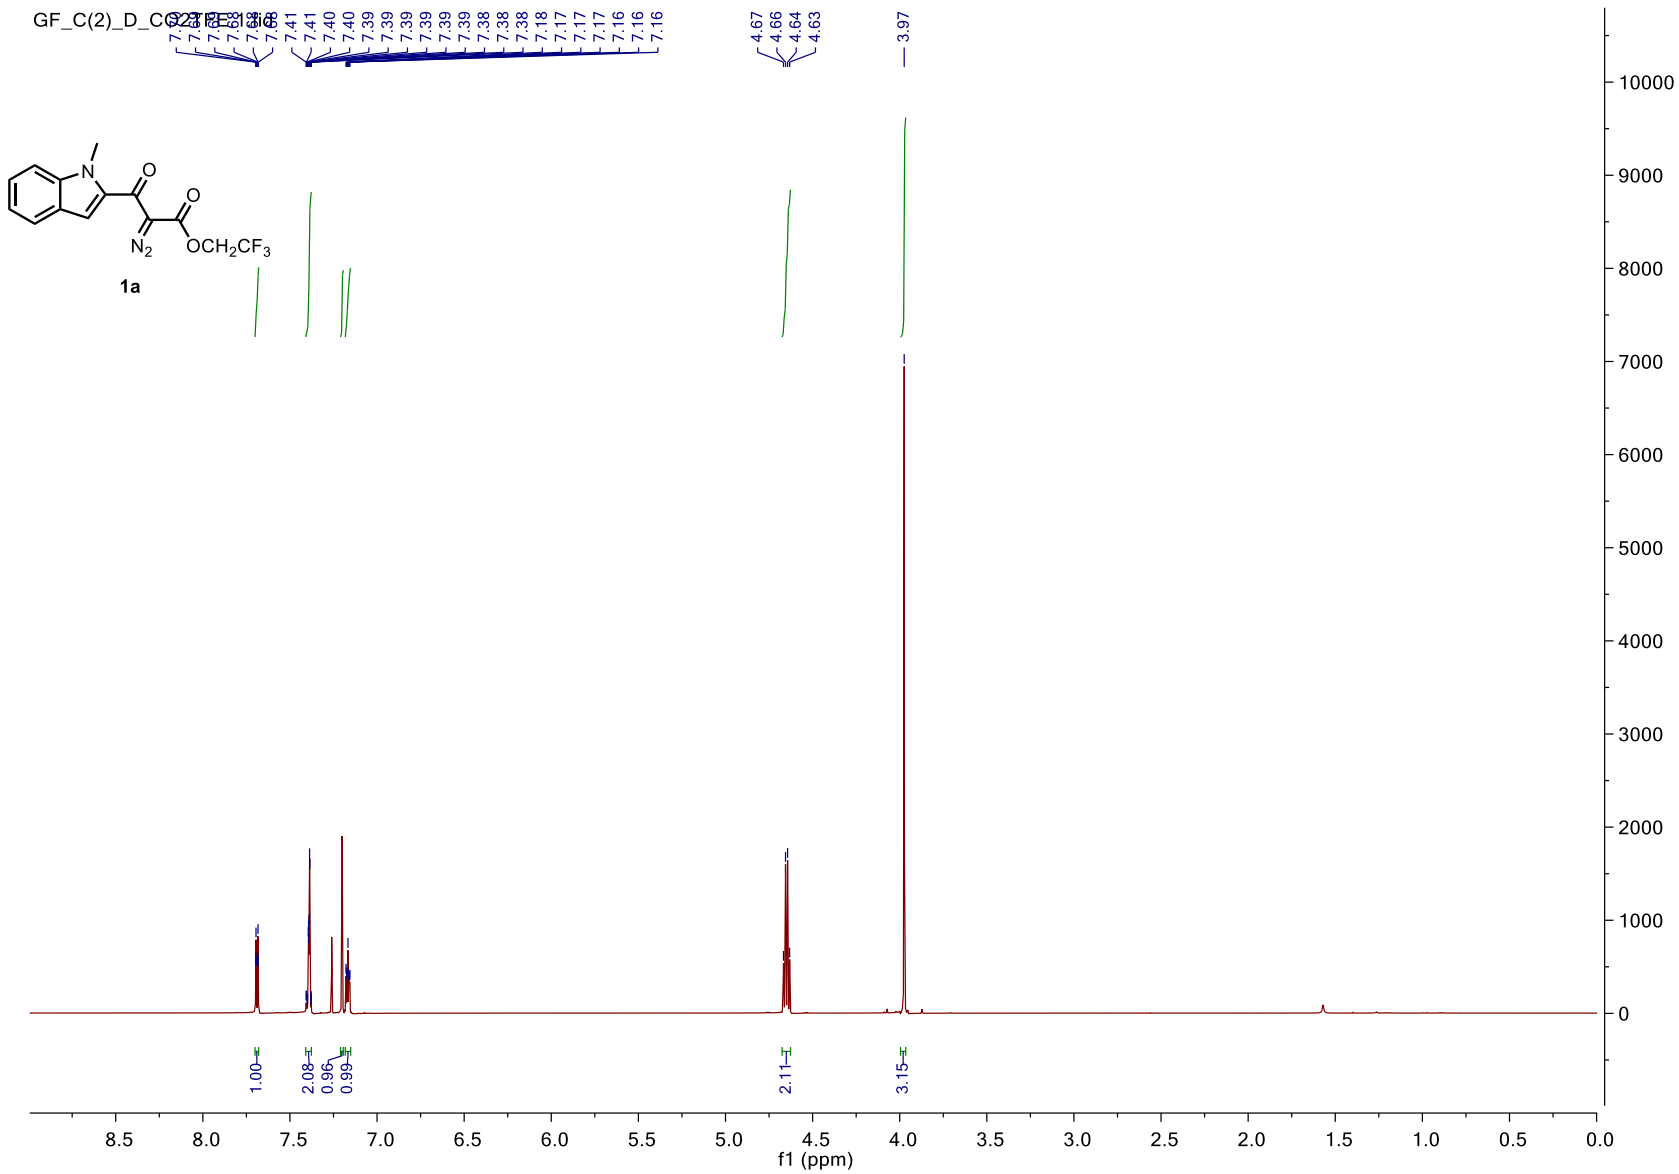

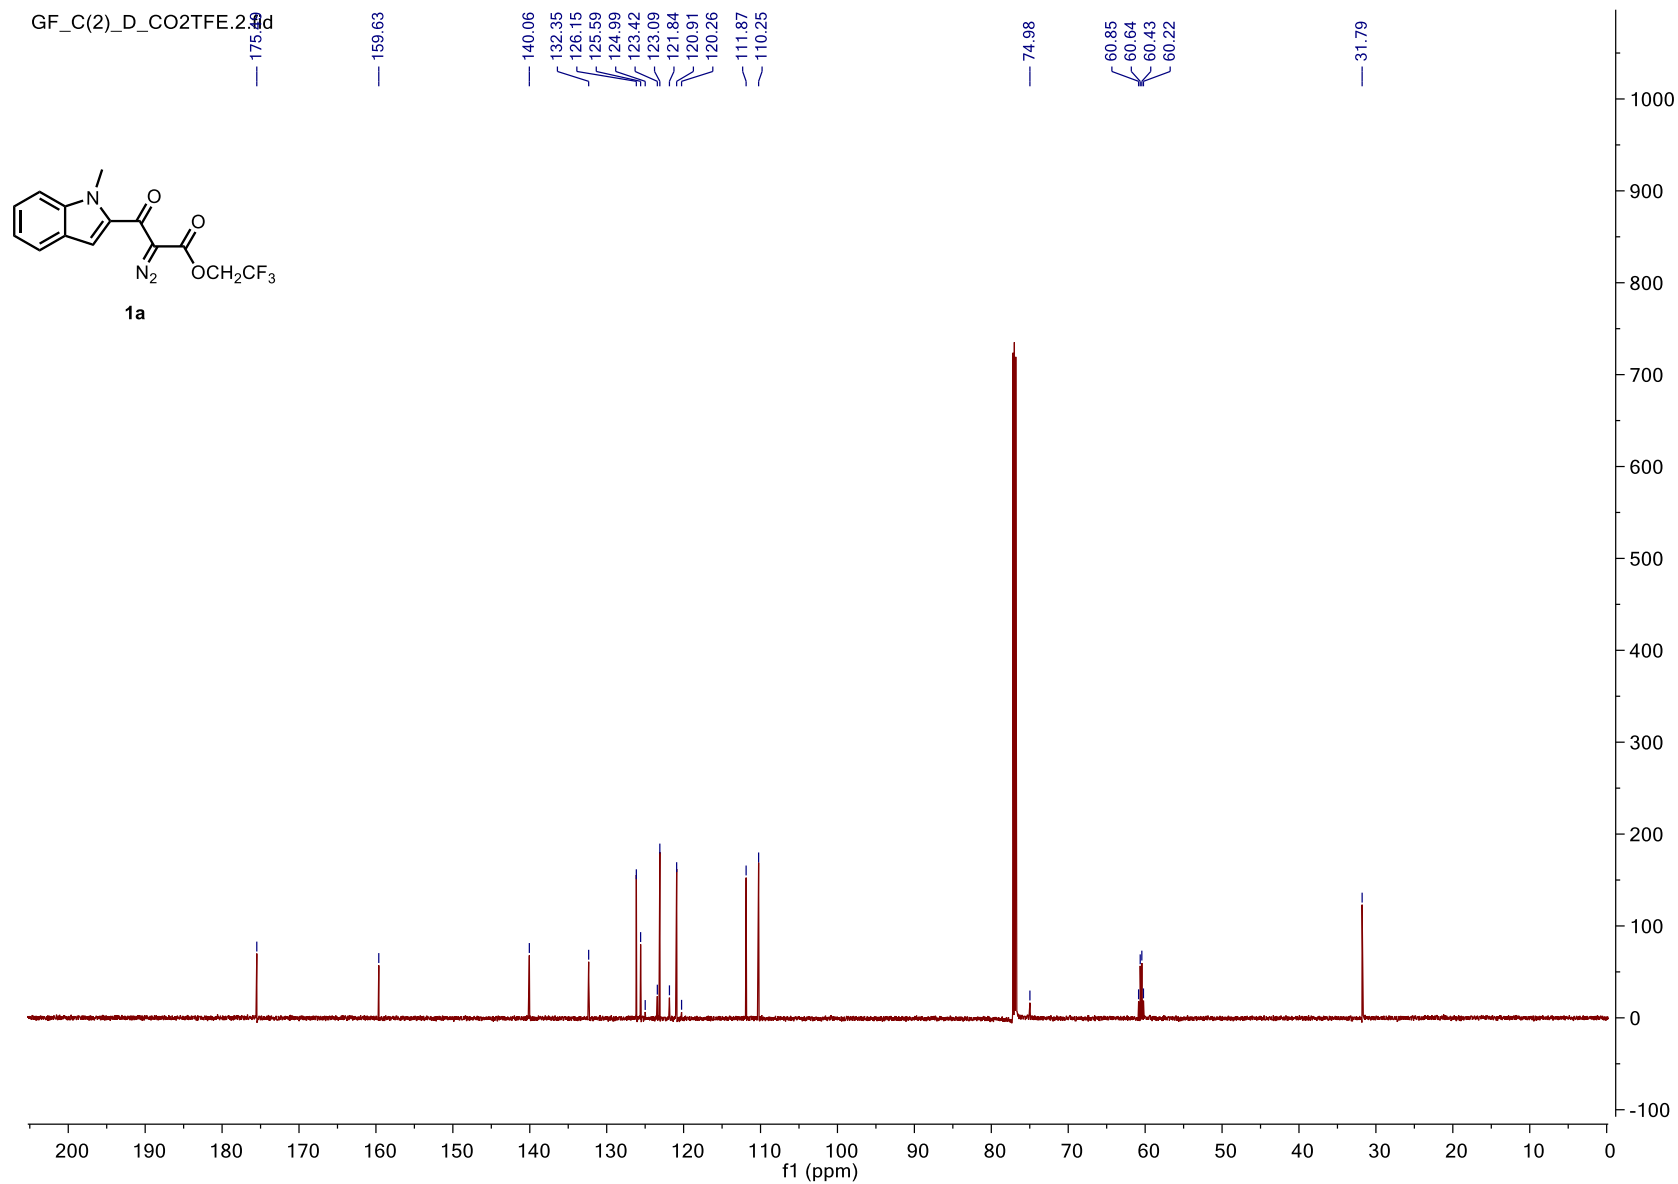

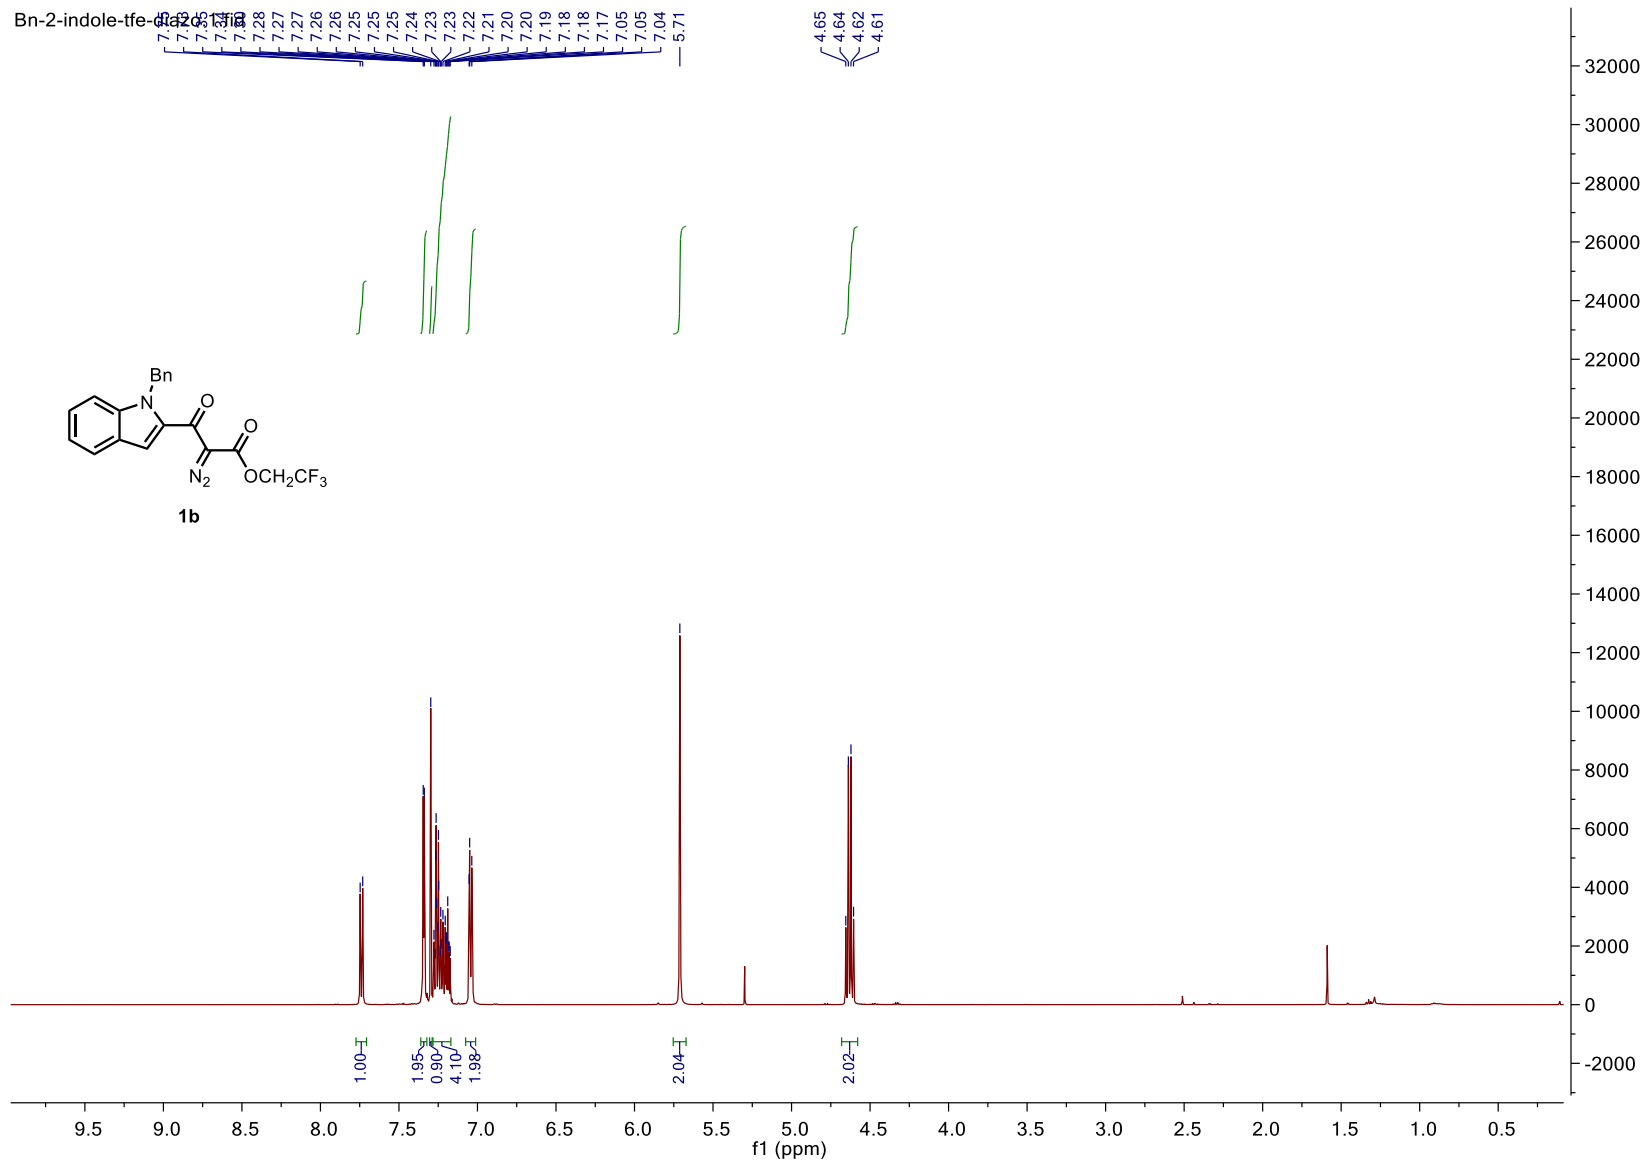



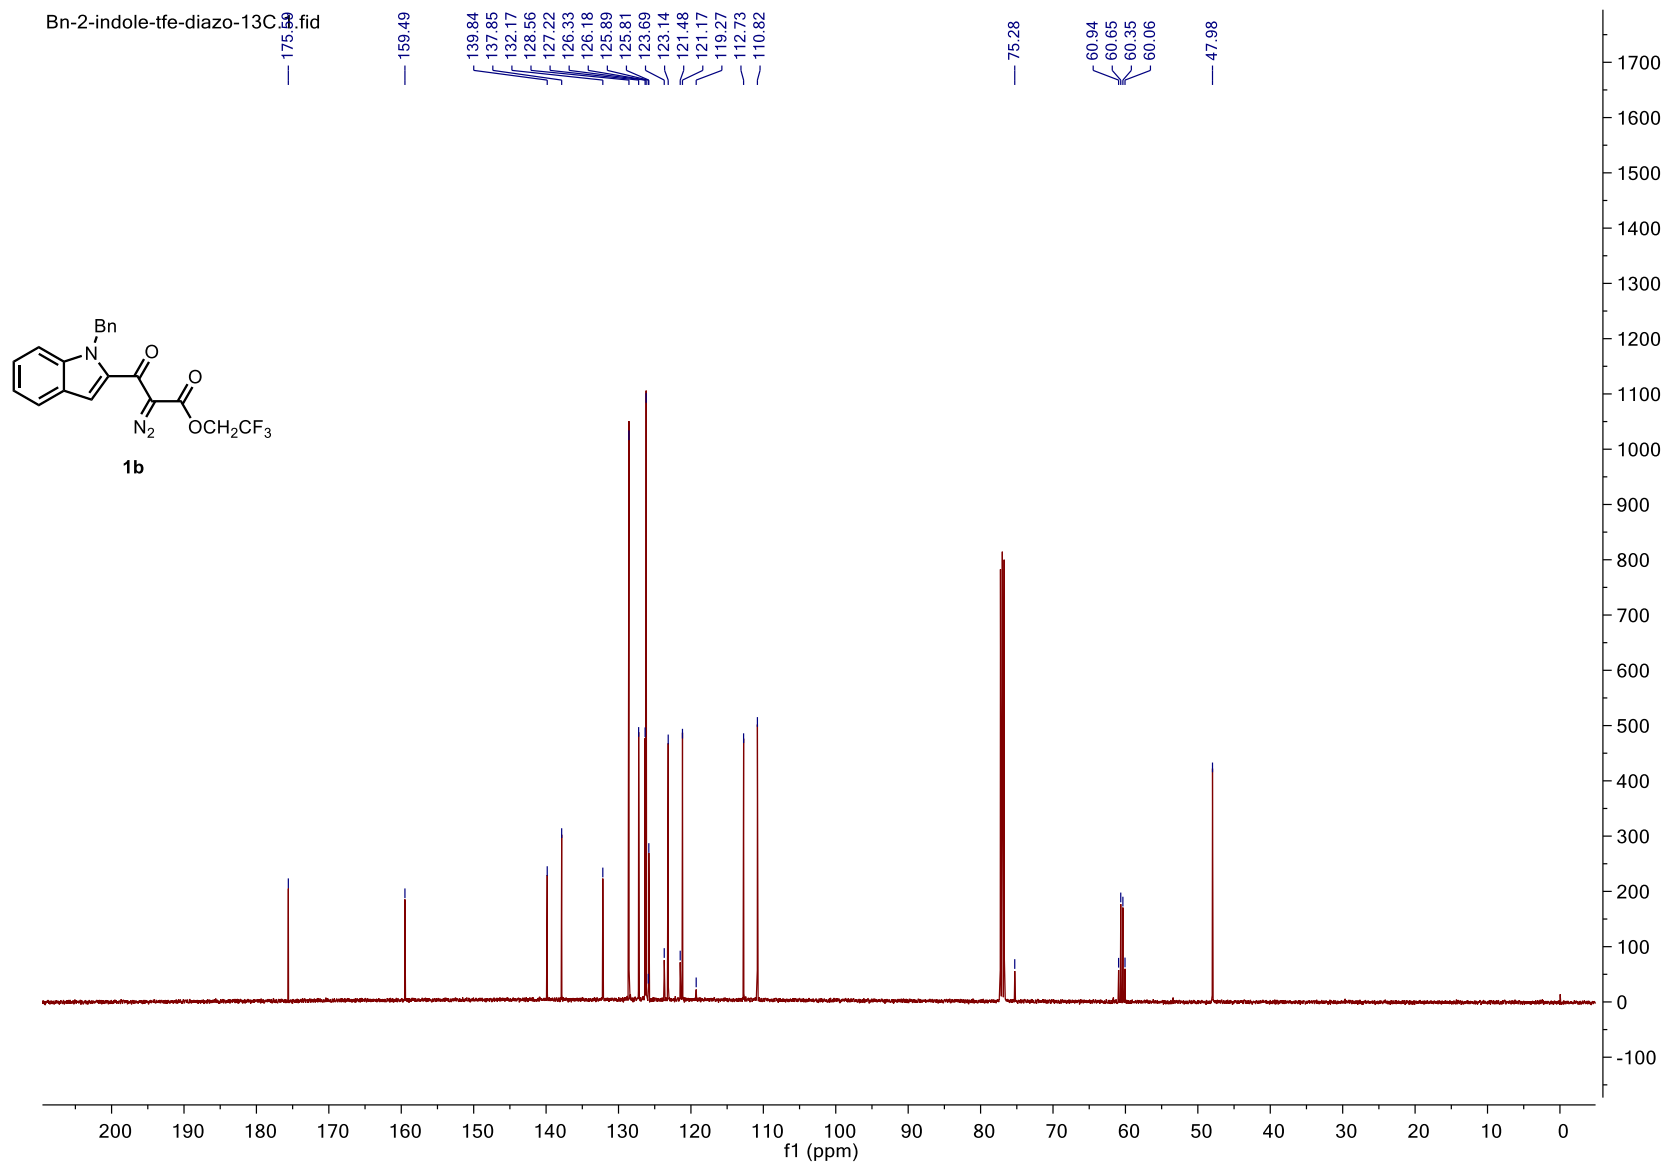

GF\_C(3)\_D\_OTFE.1.fid

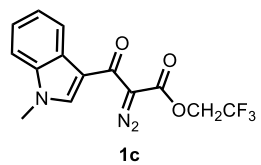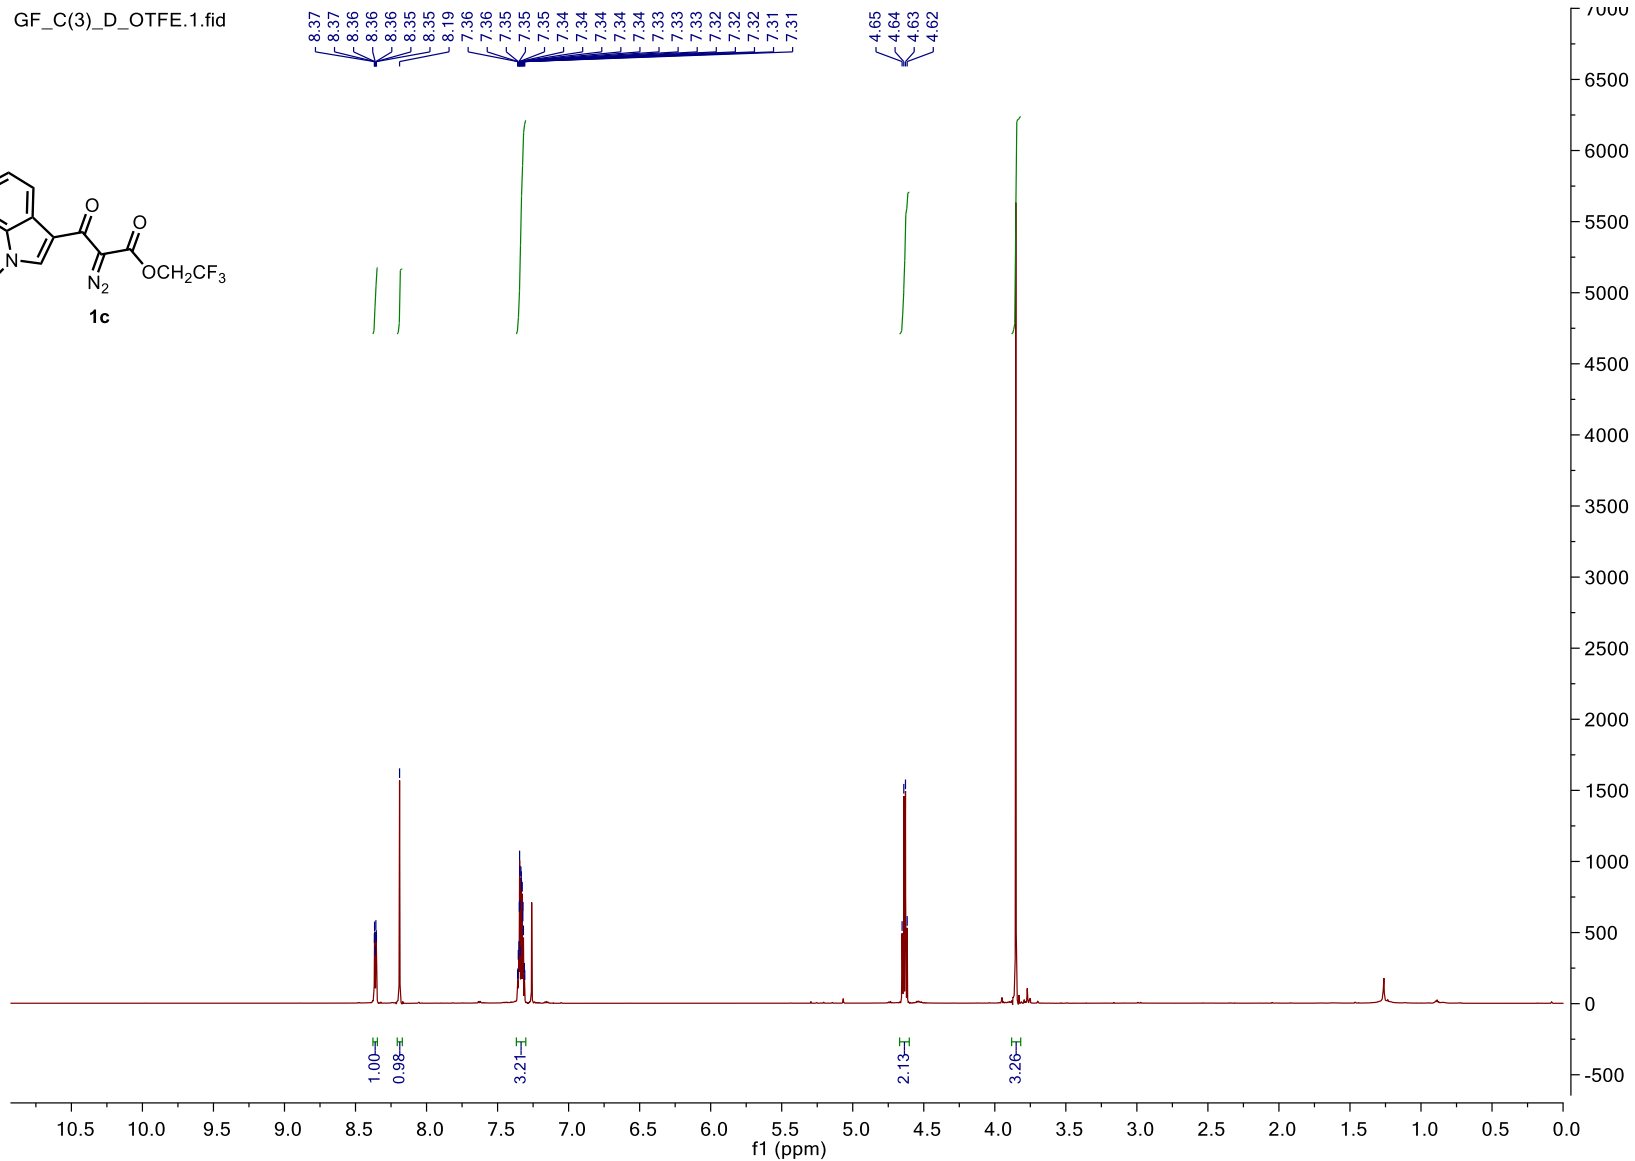

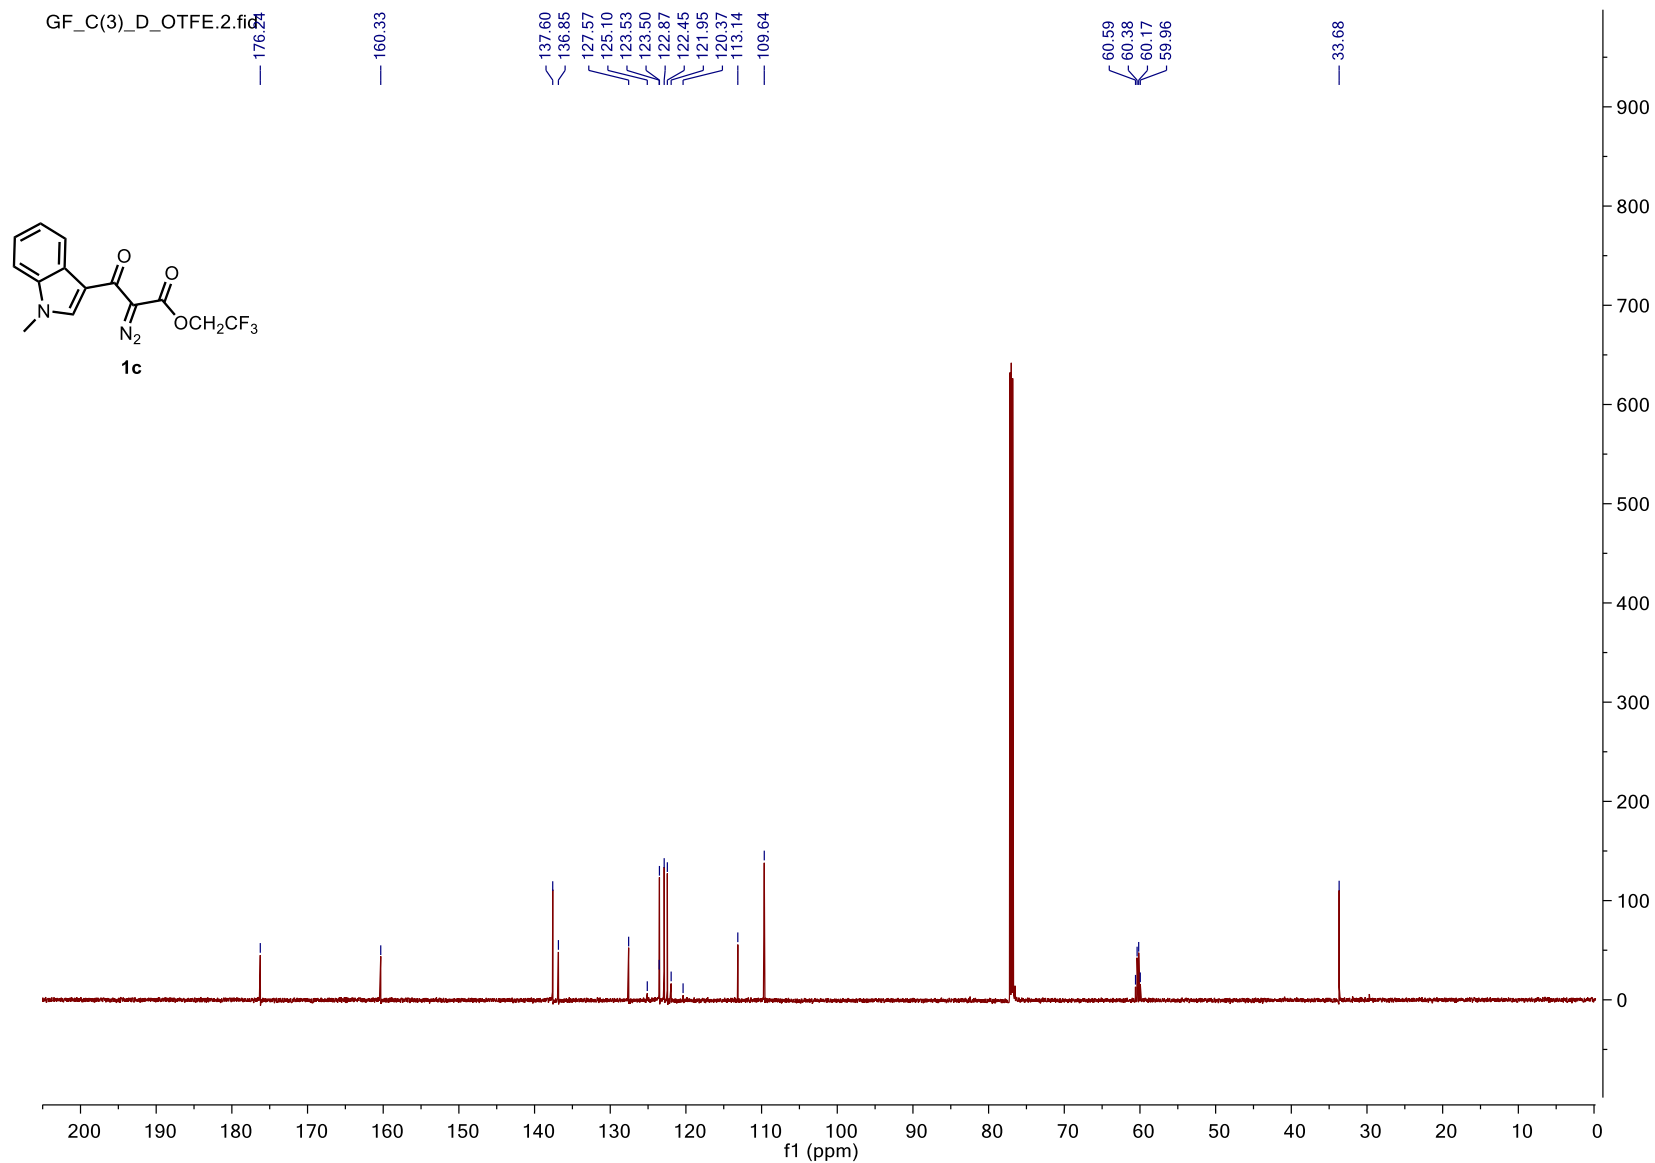

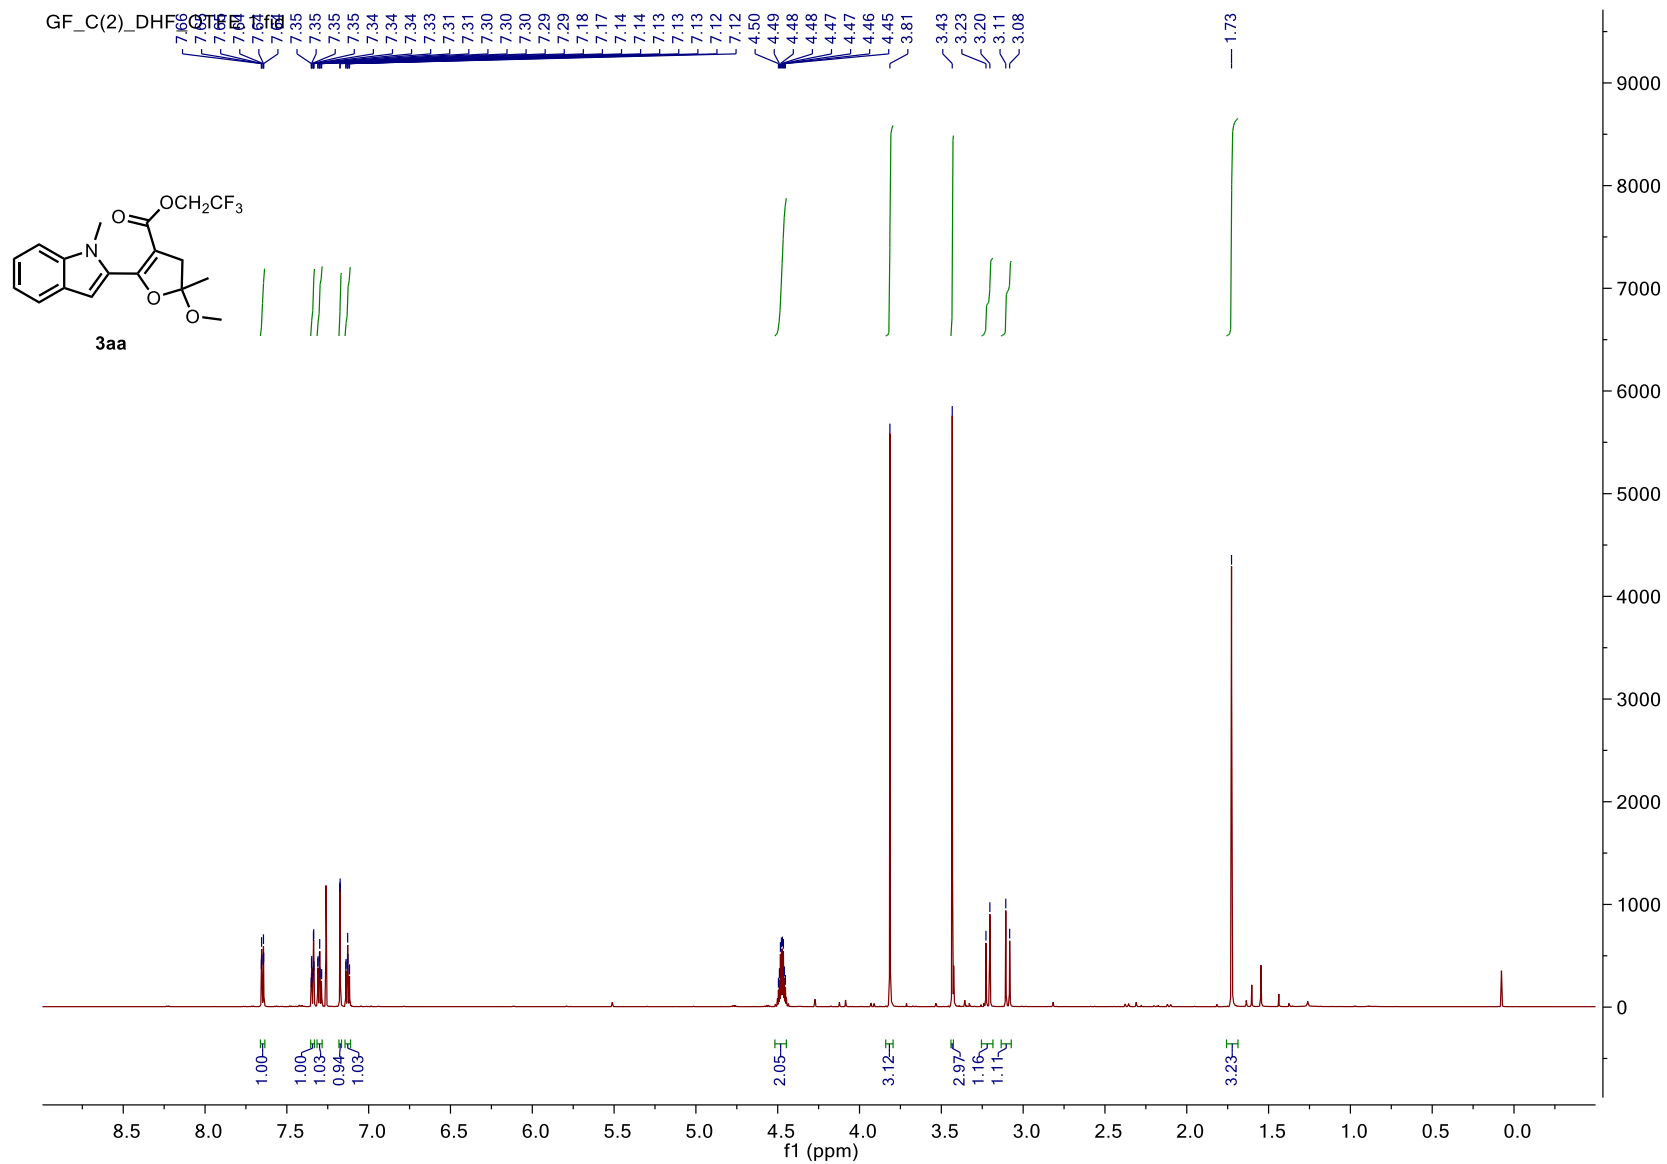

GF\_C(2)\_DHF\_OTFE.2.fid

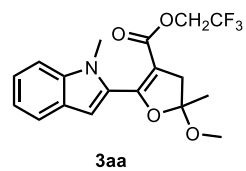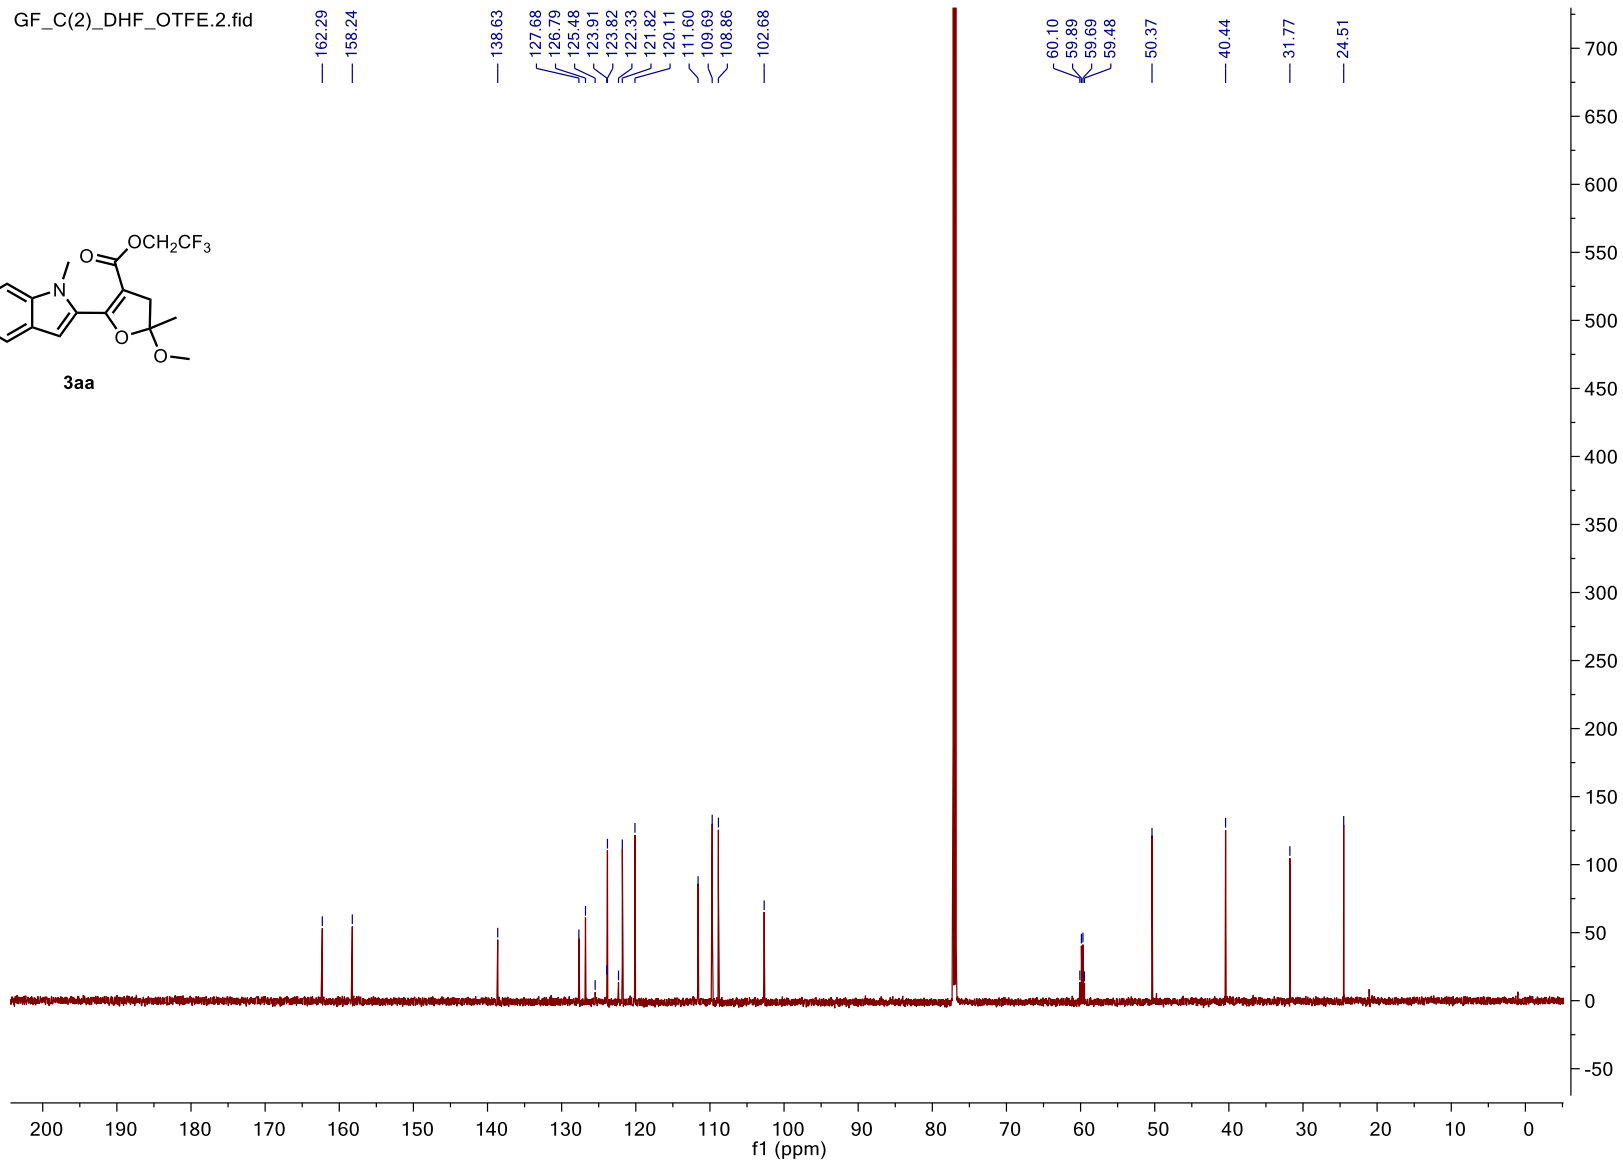

2-indole-tfe-2methoxypropene-dhf-s1-19F.1.fid

-73.41  
-73.43  
-73.45

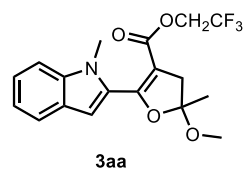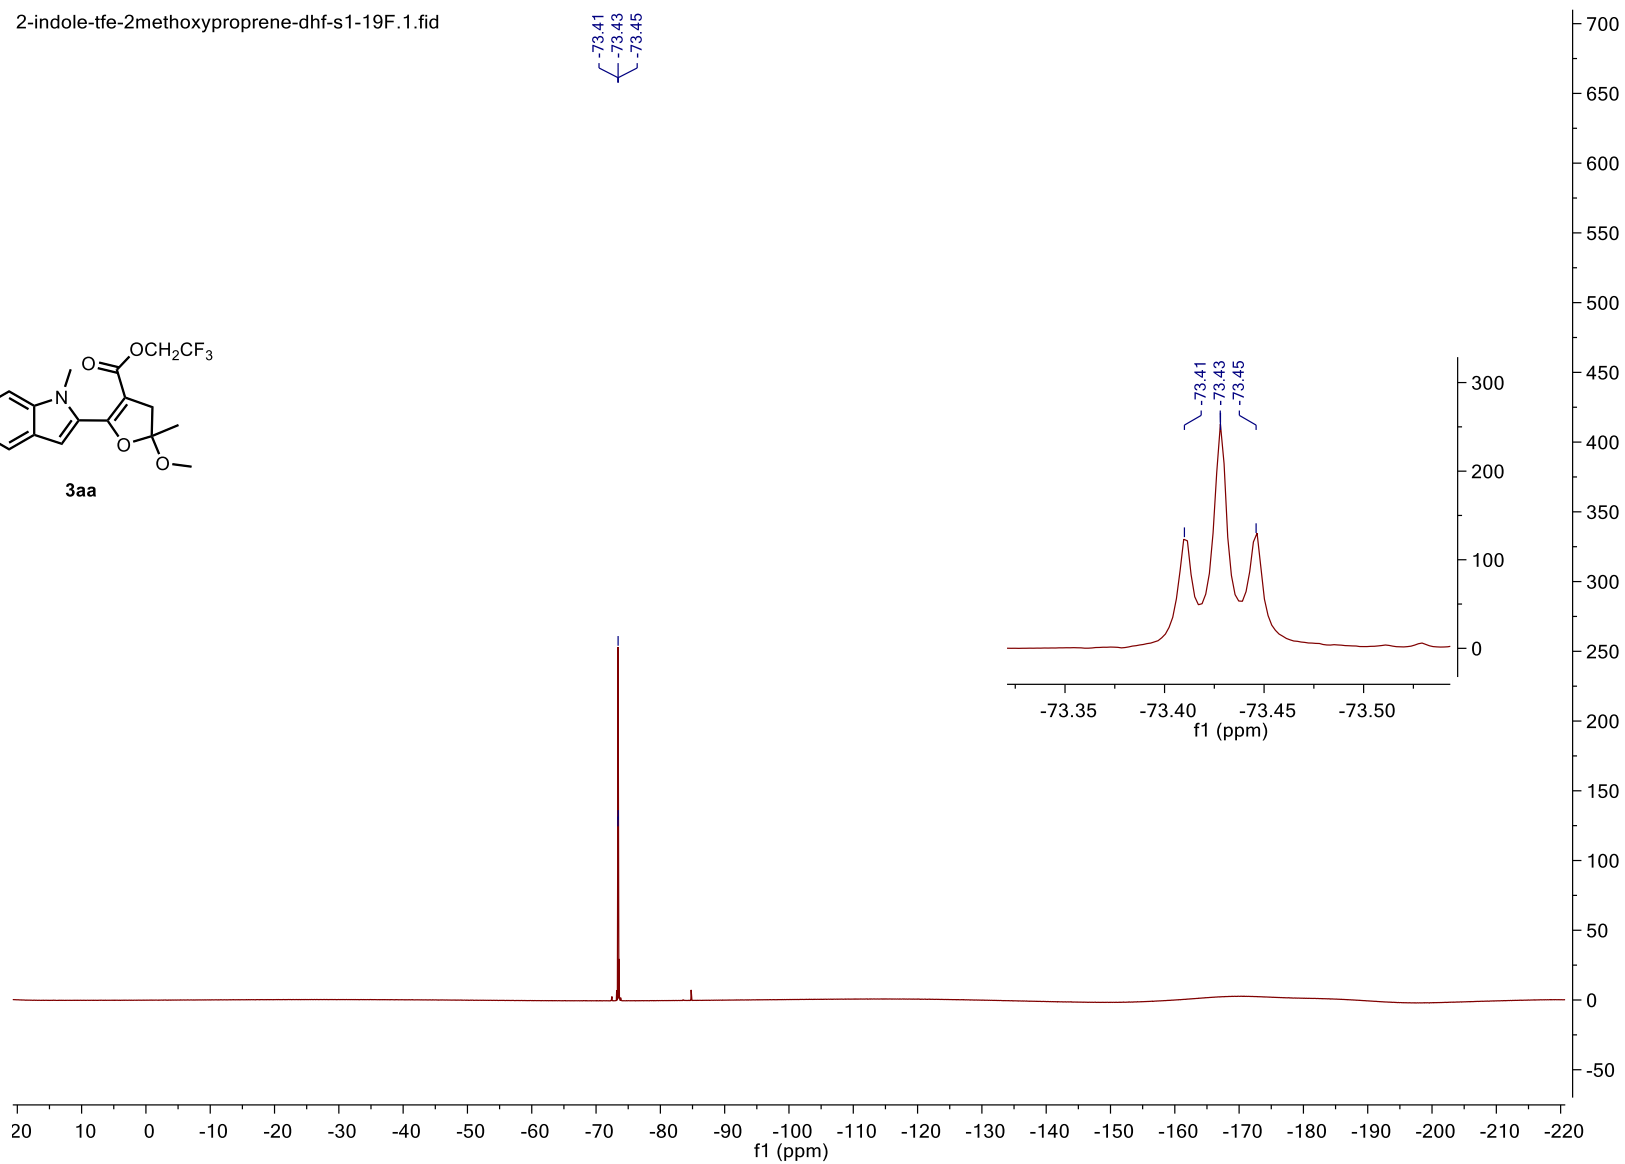

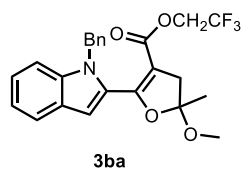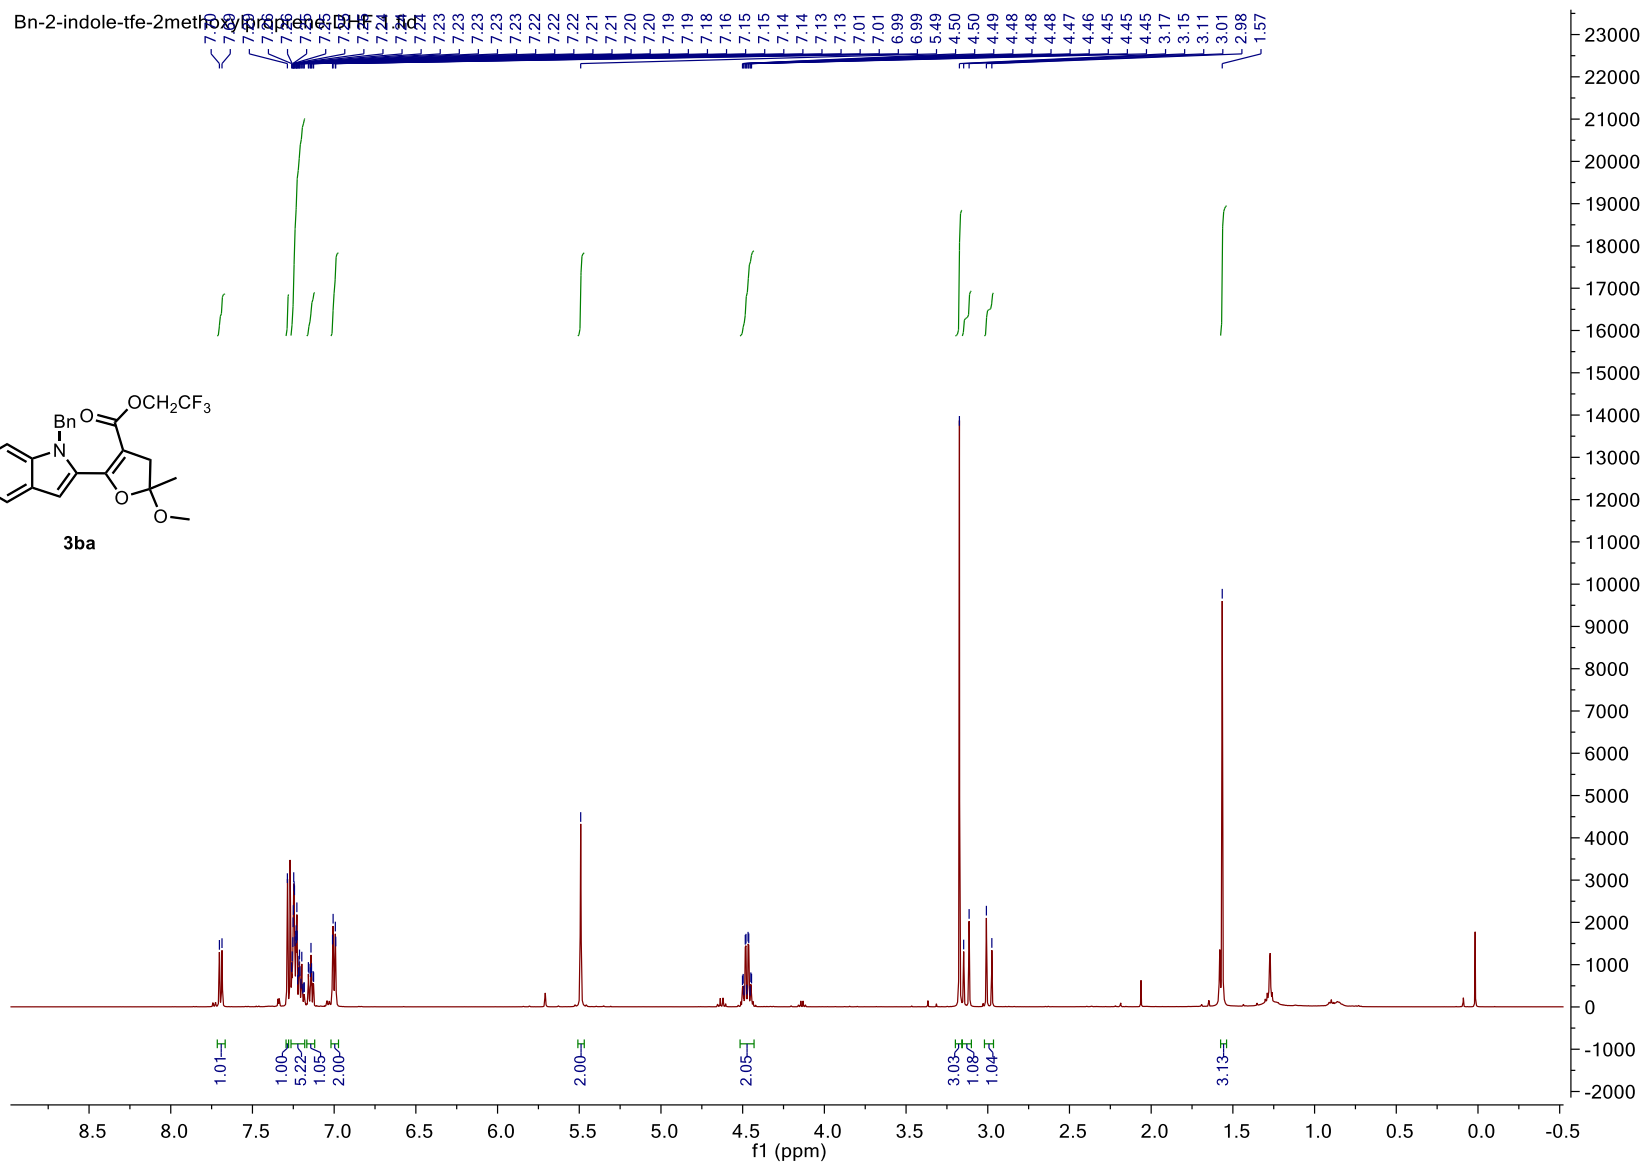

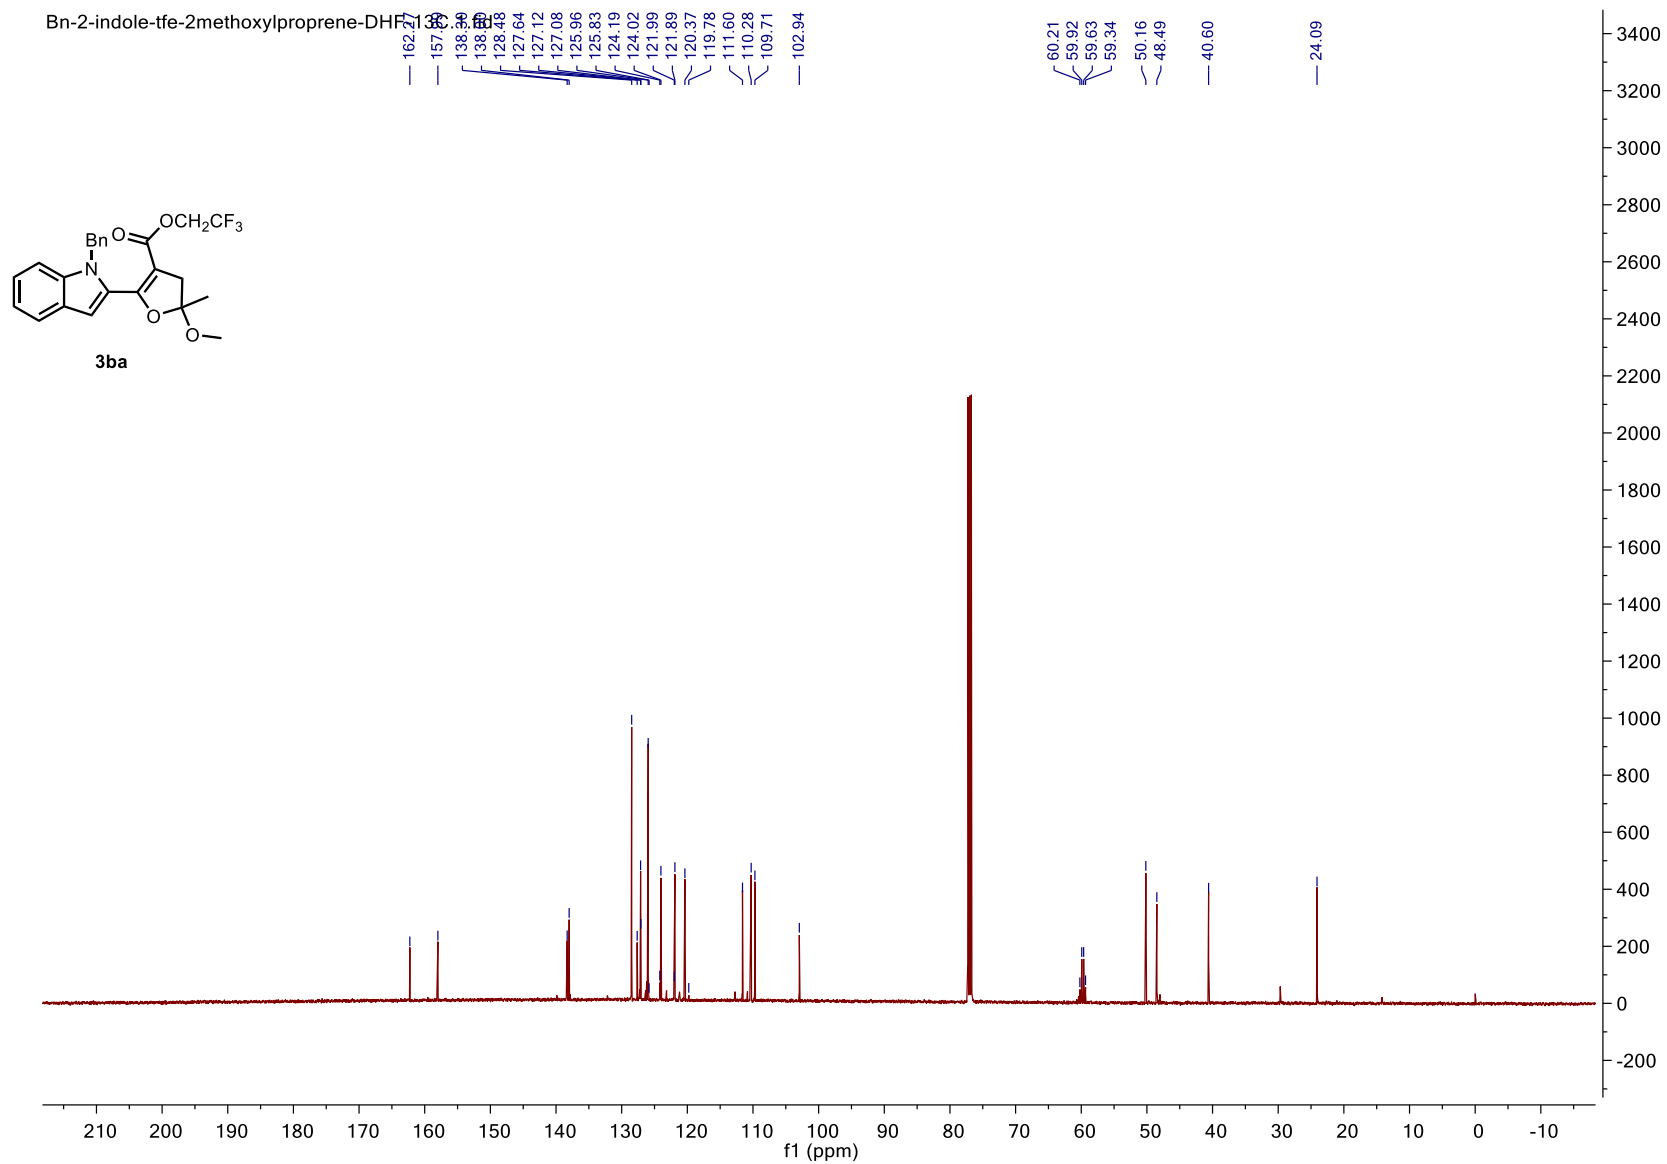



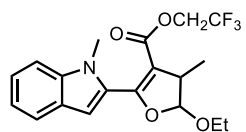

(mixture of trans:cis = 3.3:1)

**3ab**

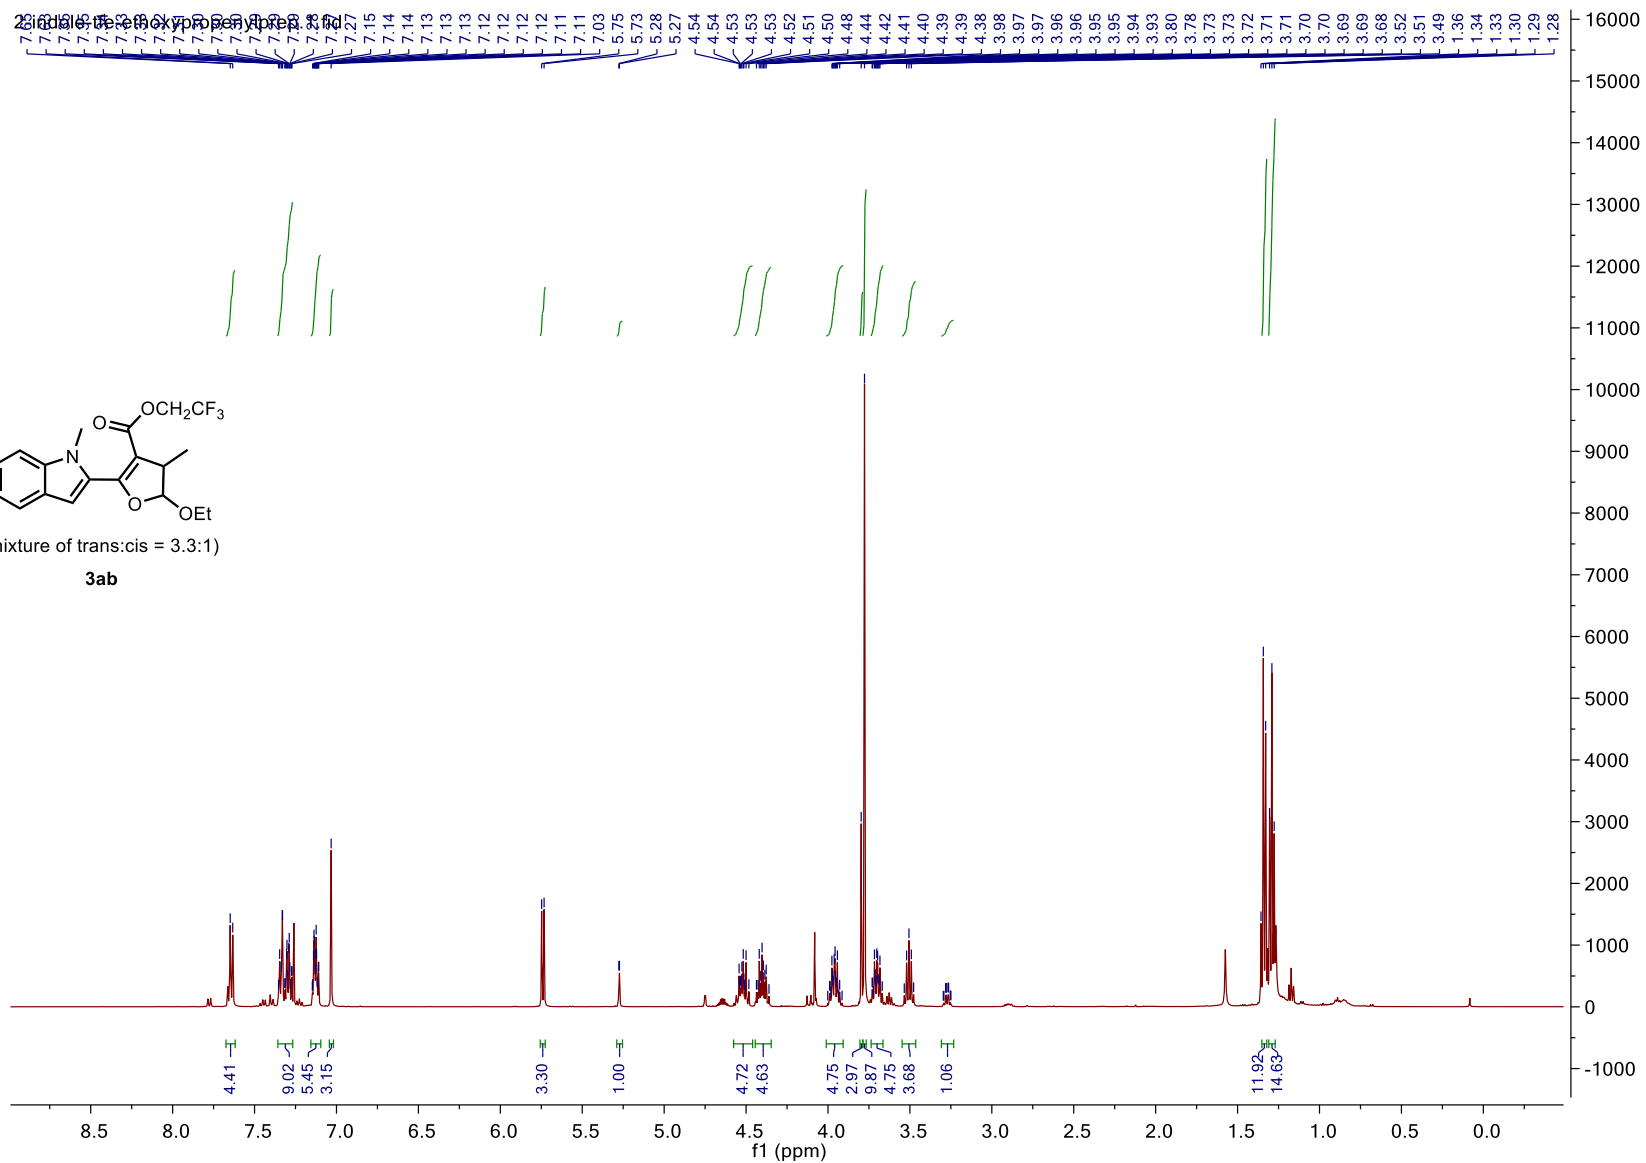

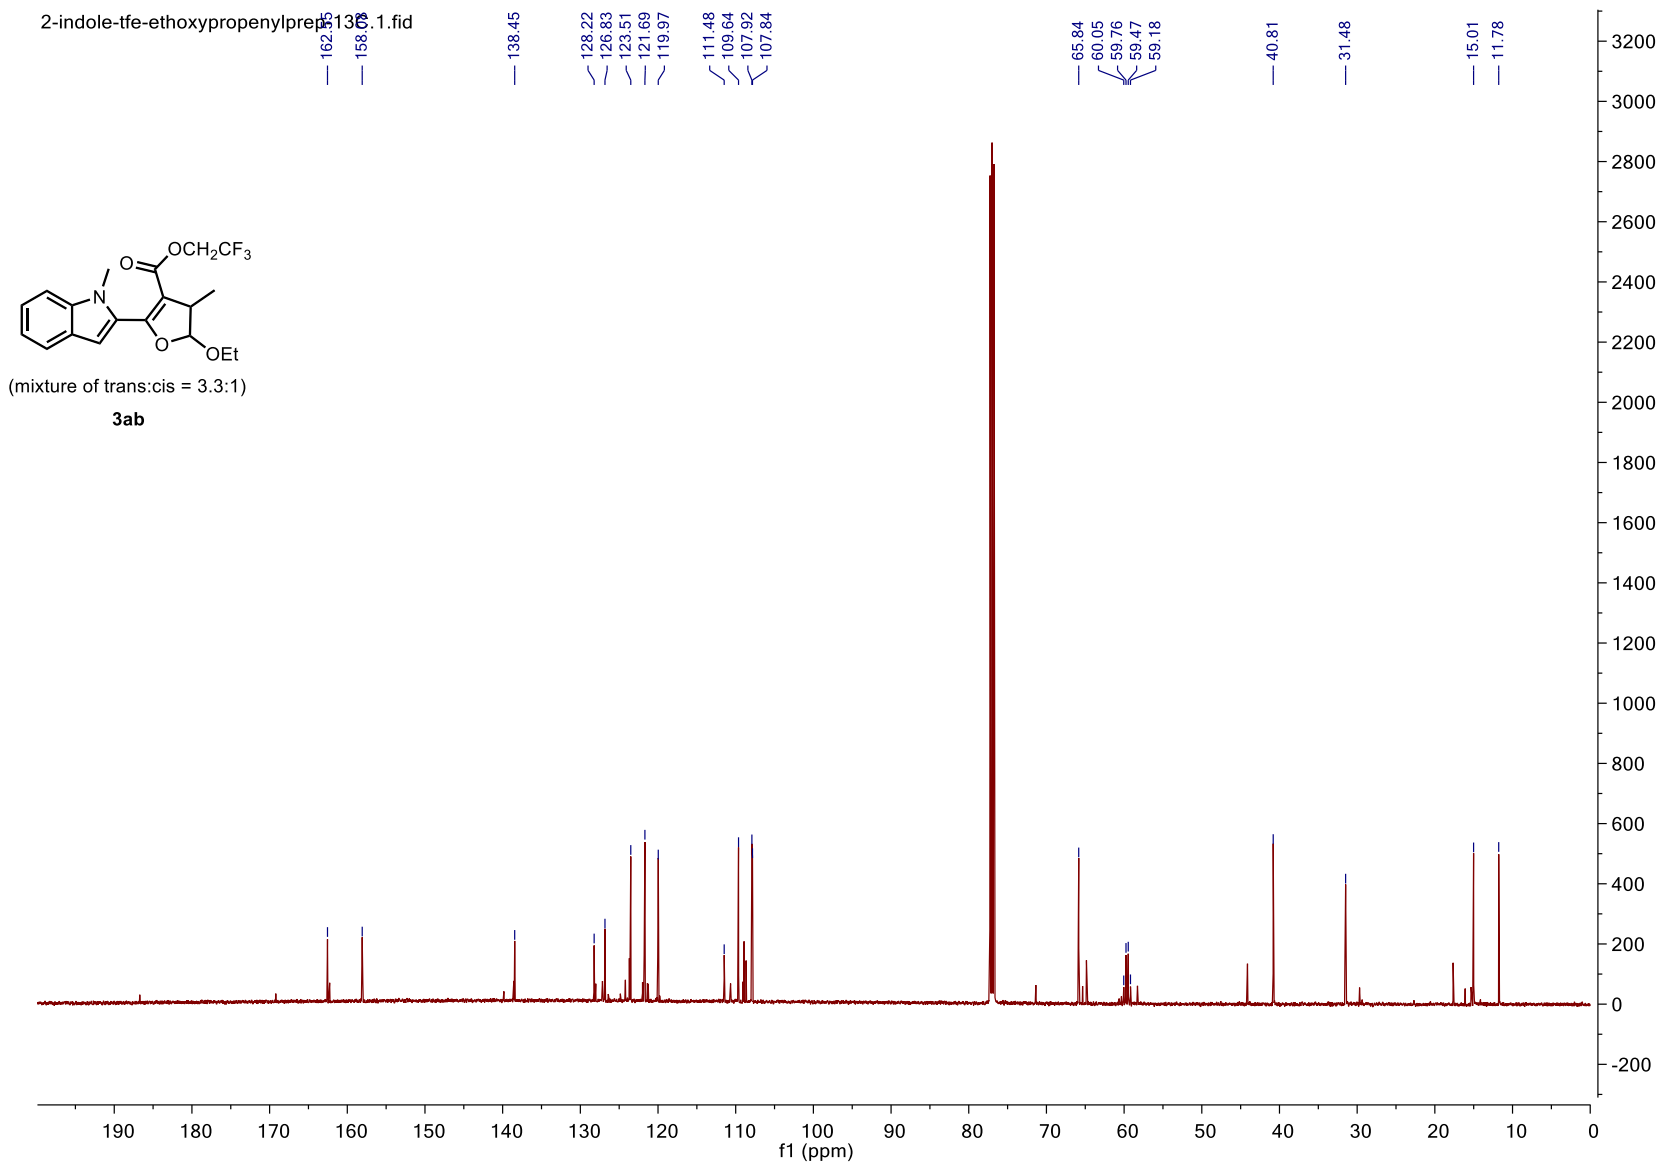

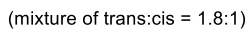

CC1=C(C(=O)OCC)OC(C1C2=CN(Cc3ccccc3)C=C4C=CC=CC=C42)C(=O)OCCF

mixture of trans:cis = 1.8:1)

**3bb**

1H NMR spectrum (CDCl<sub>3</sub>) of compound **3bb**. The spectrum shows peaks from 1.15 to 7.18 ppm. Integration values are provided below the peaks: 2.87, 17.36, 5.26, 5.68, 1.81, 5.64, 1.00, 3.18, 3.01, 2.92, 3.06, 1.88, 1.01, 8.87, and 8.94. A chemical structure of **3bb** is shown in the top left corner.

Bn-indole-1-ethoxypropene-mixture 13C.1.fid

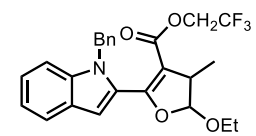

(mixture of trans:cis = 1.8:1)

**3bb**

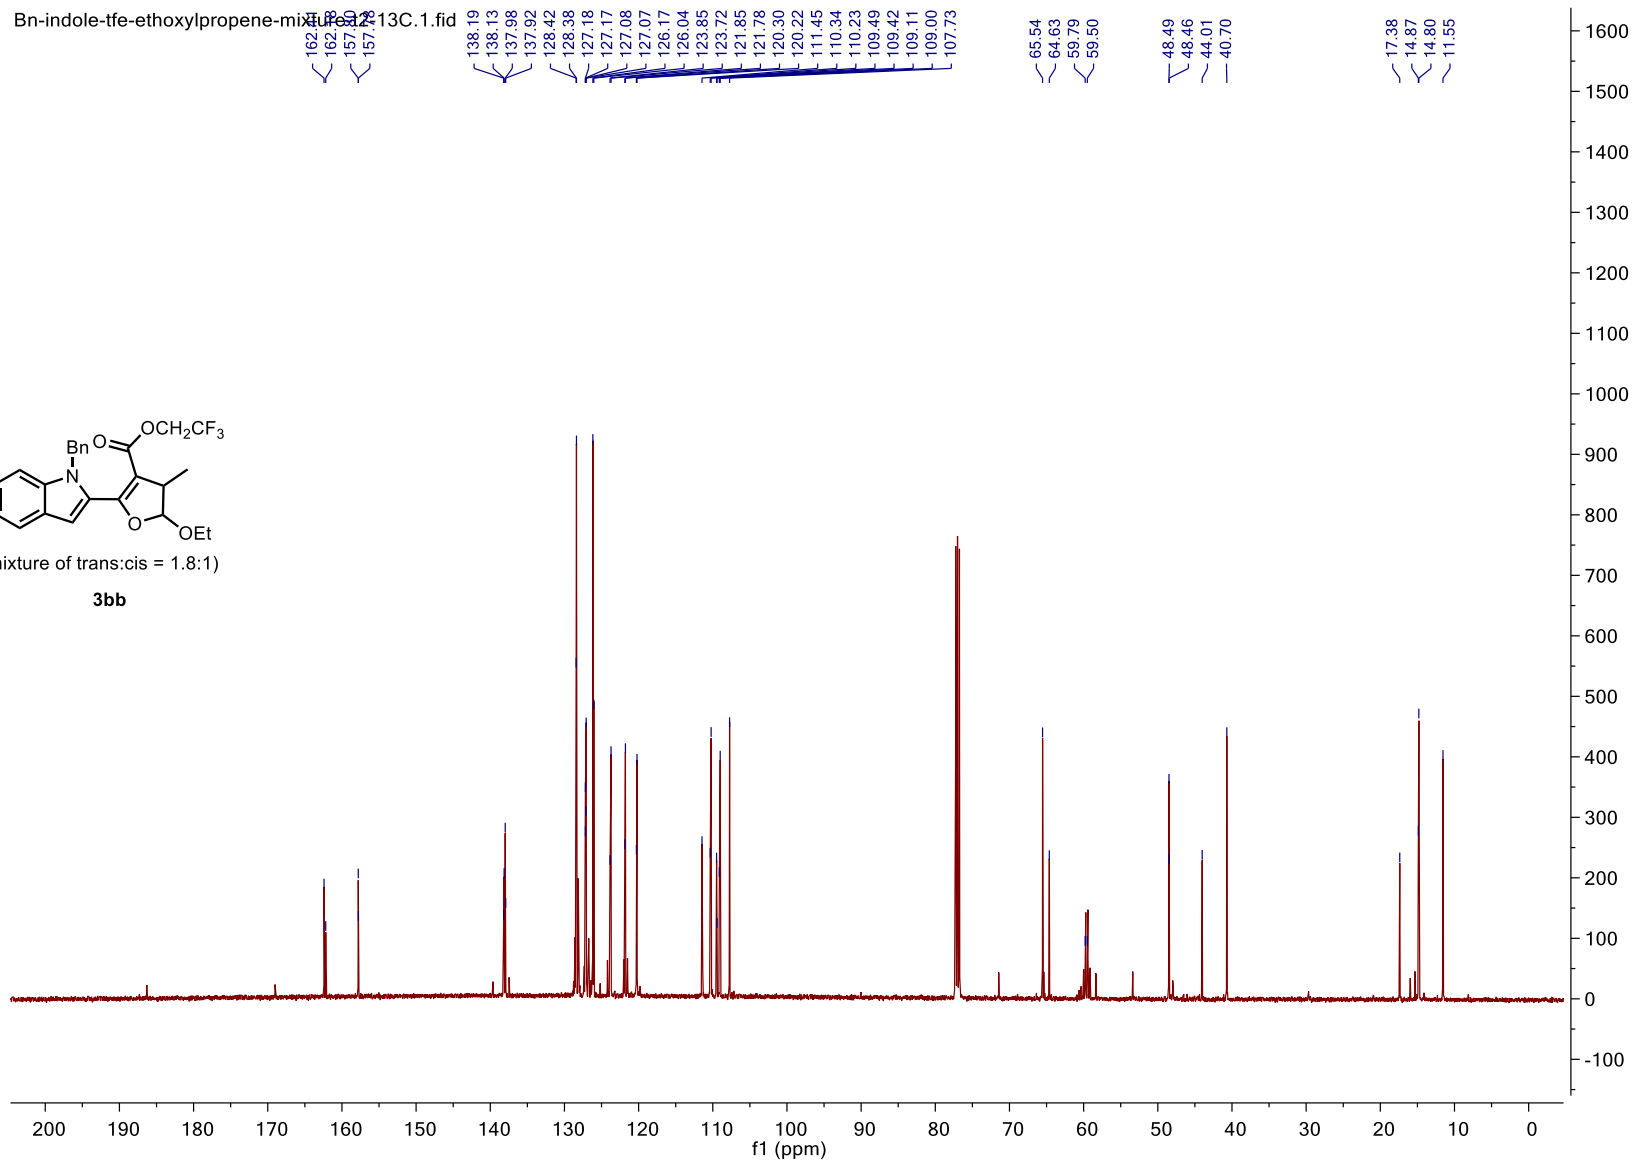

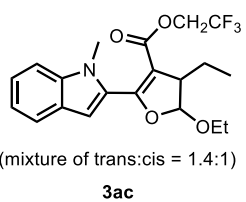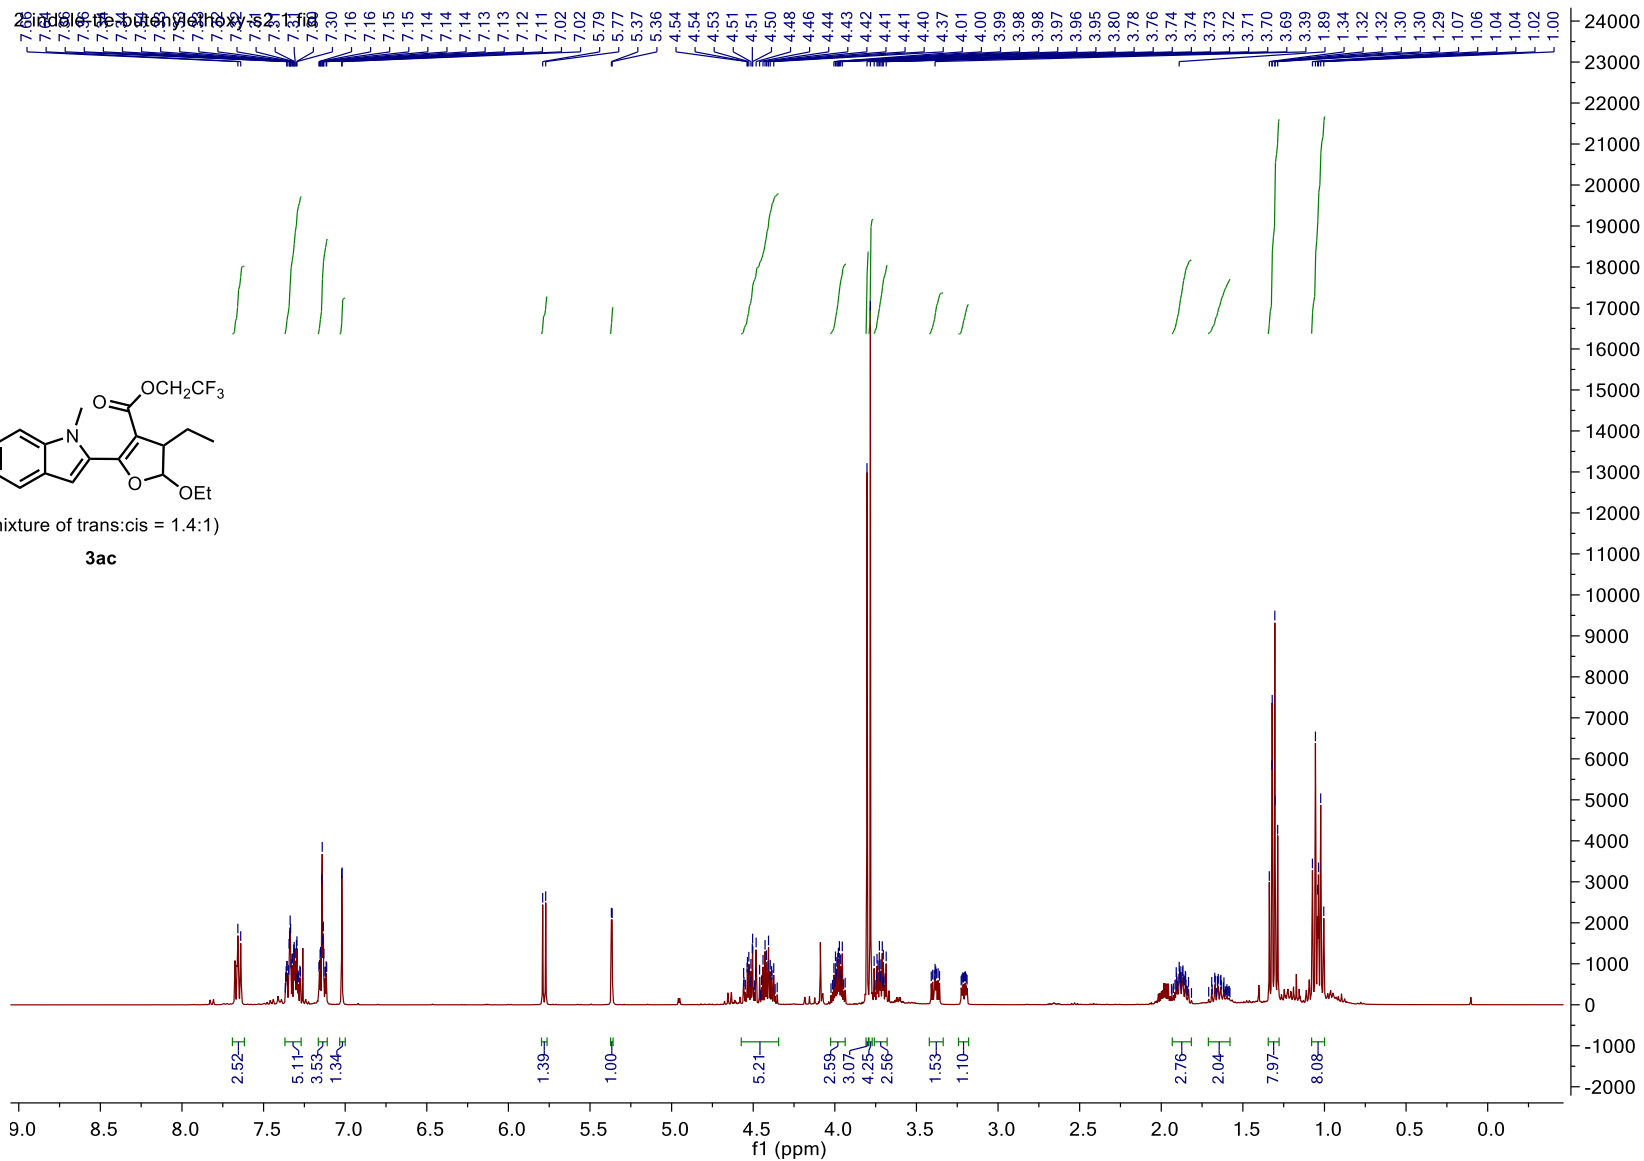

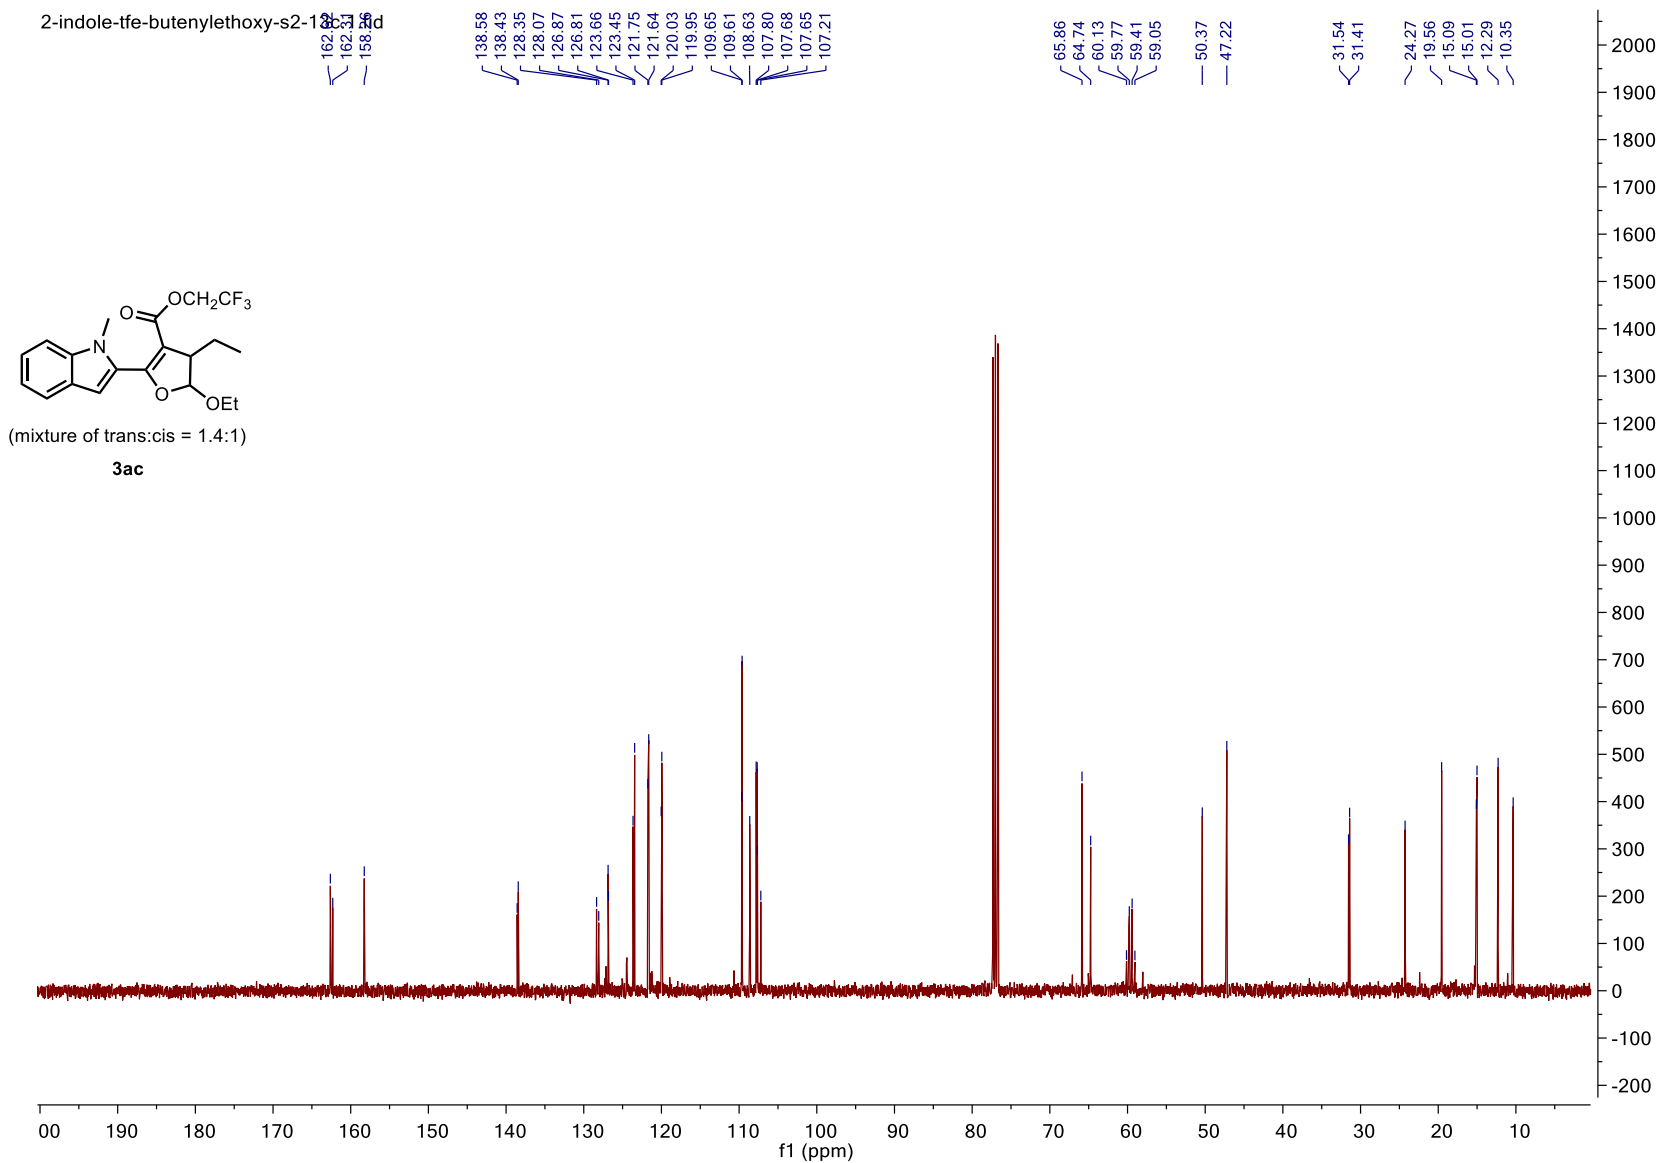

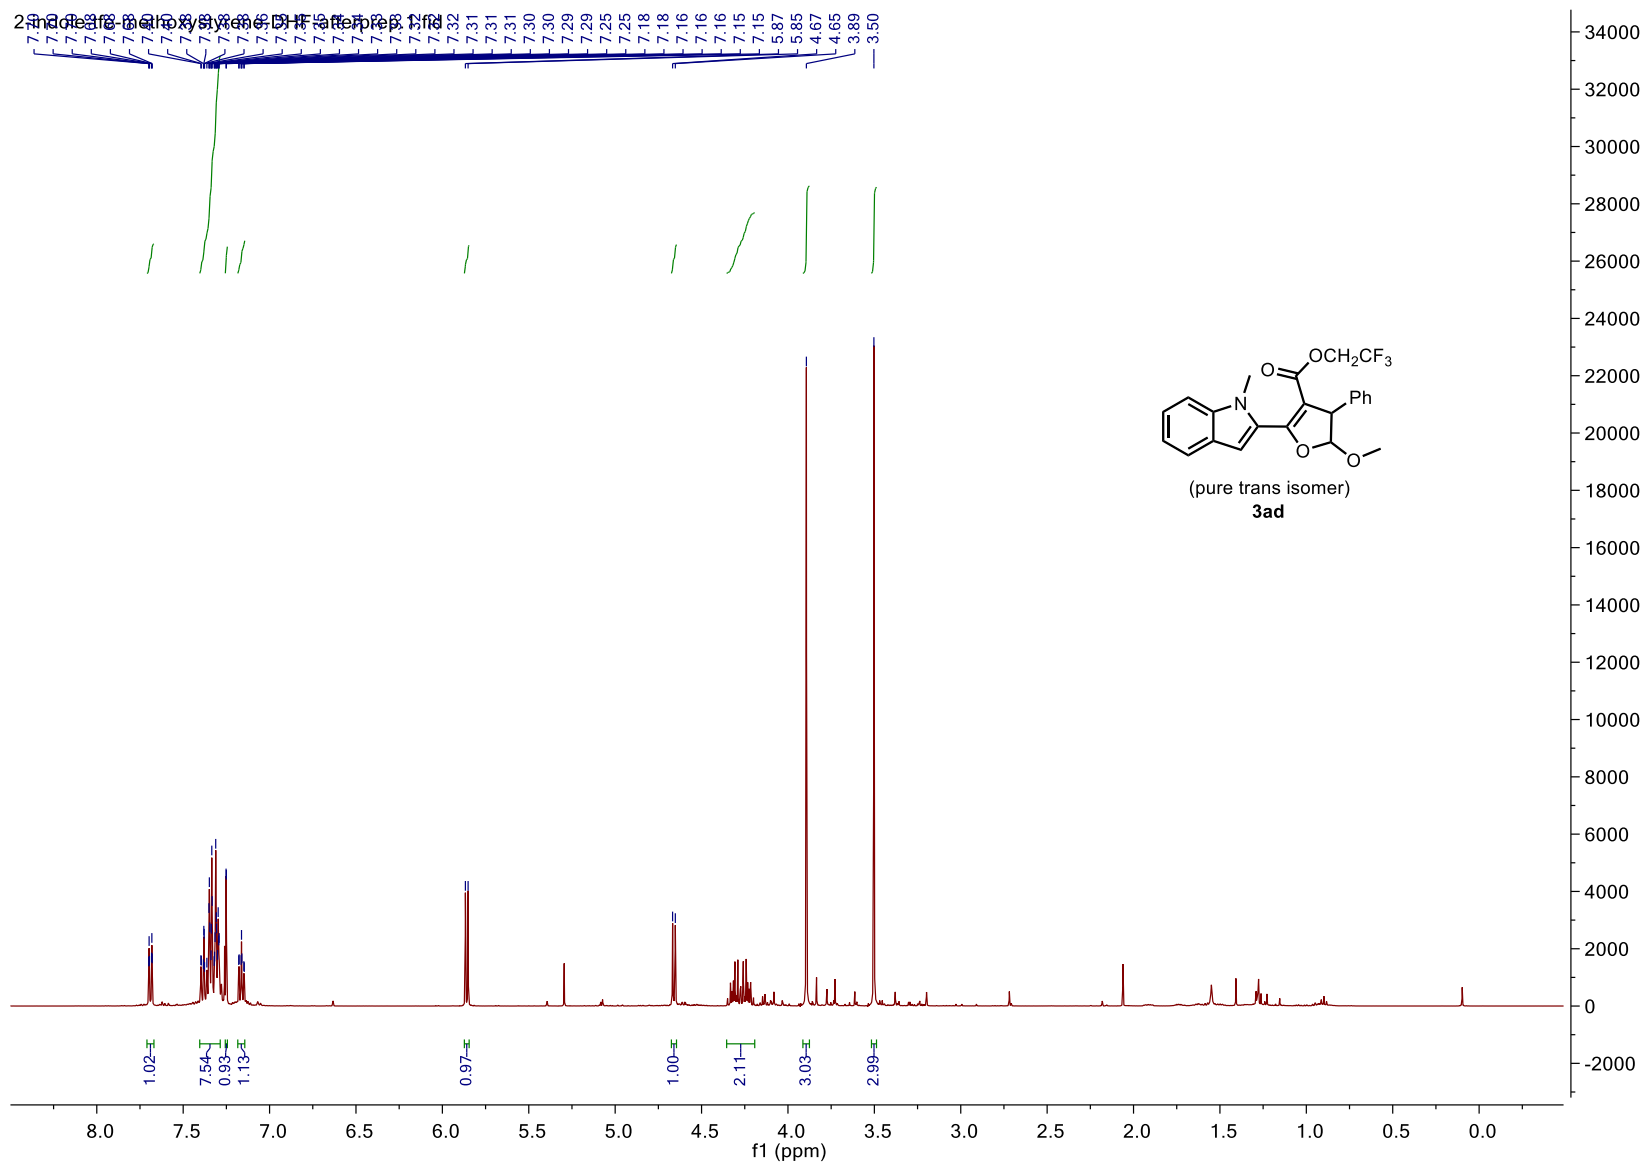

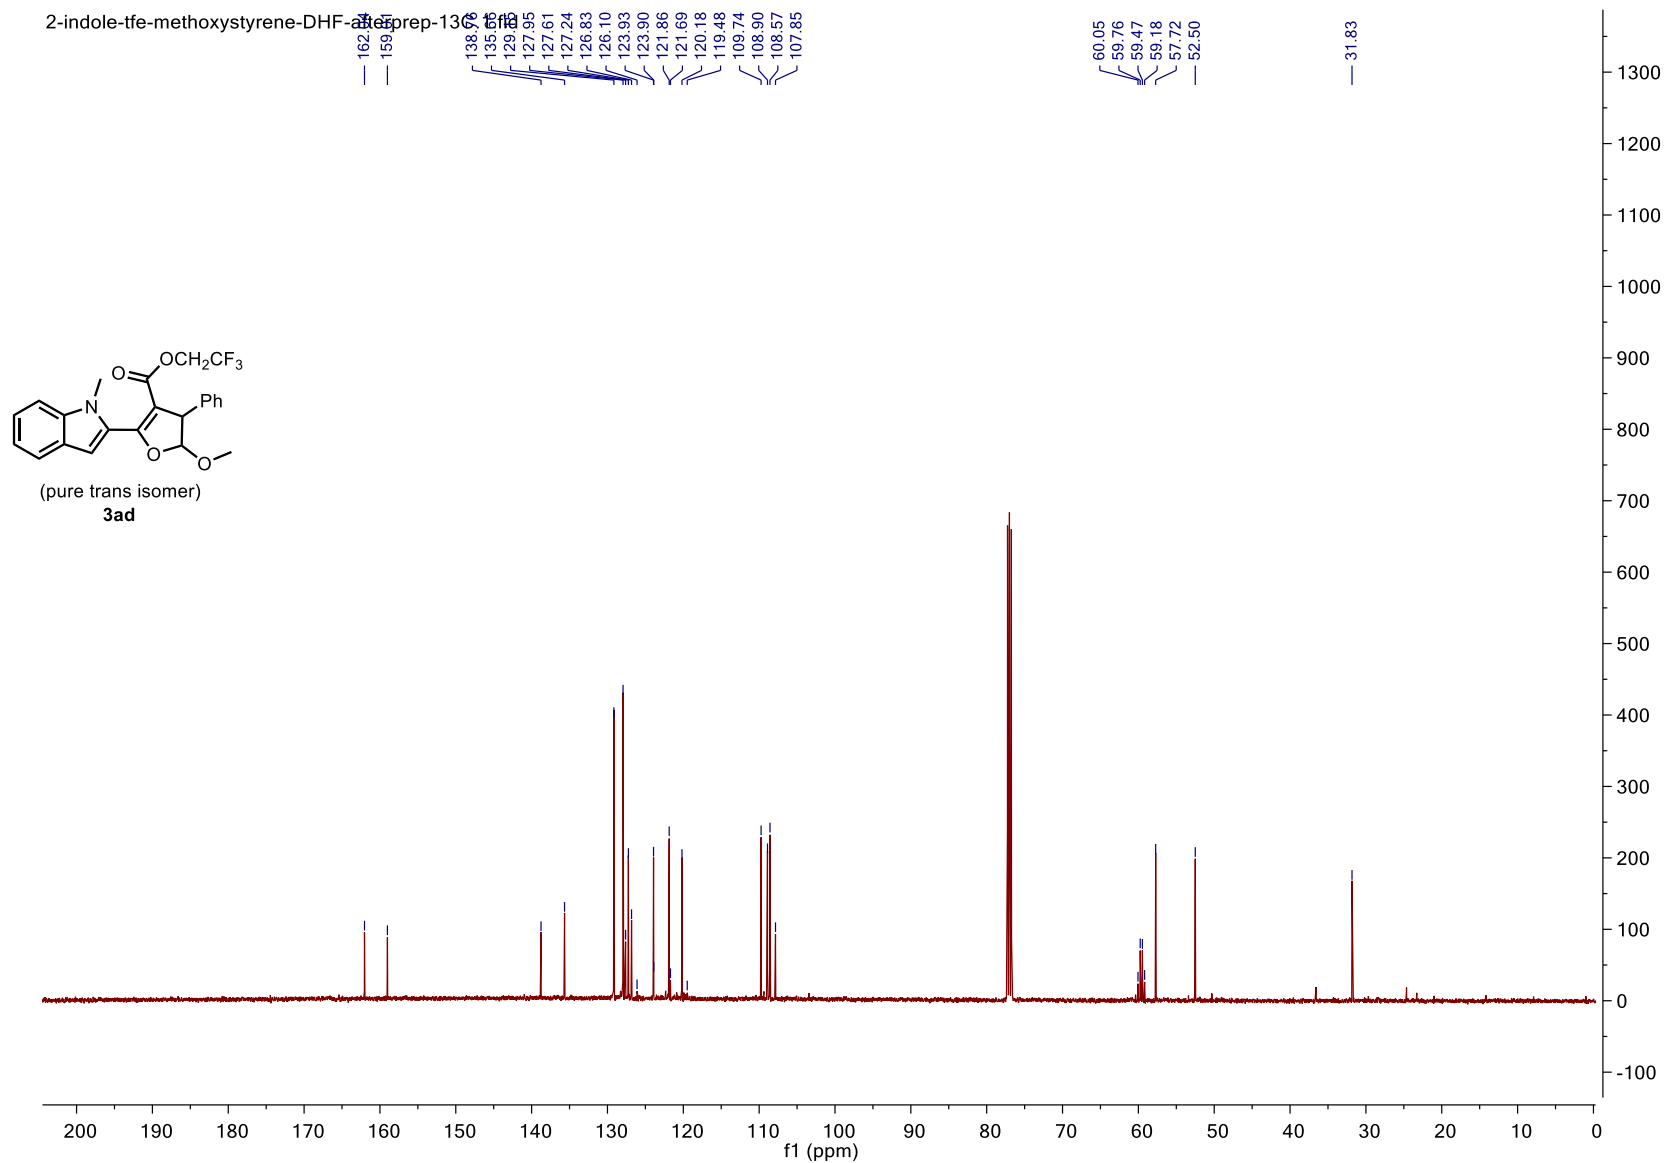



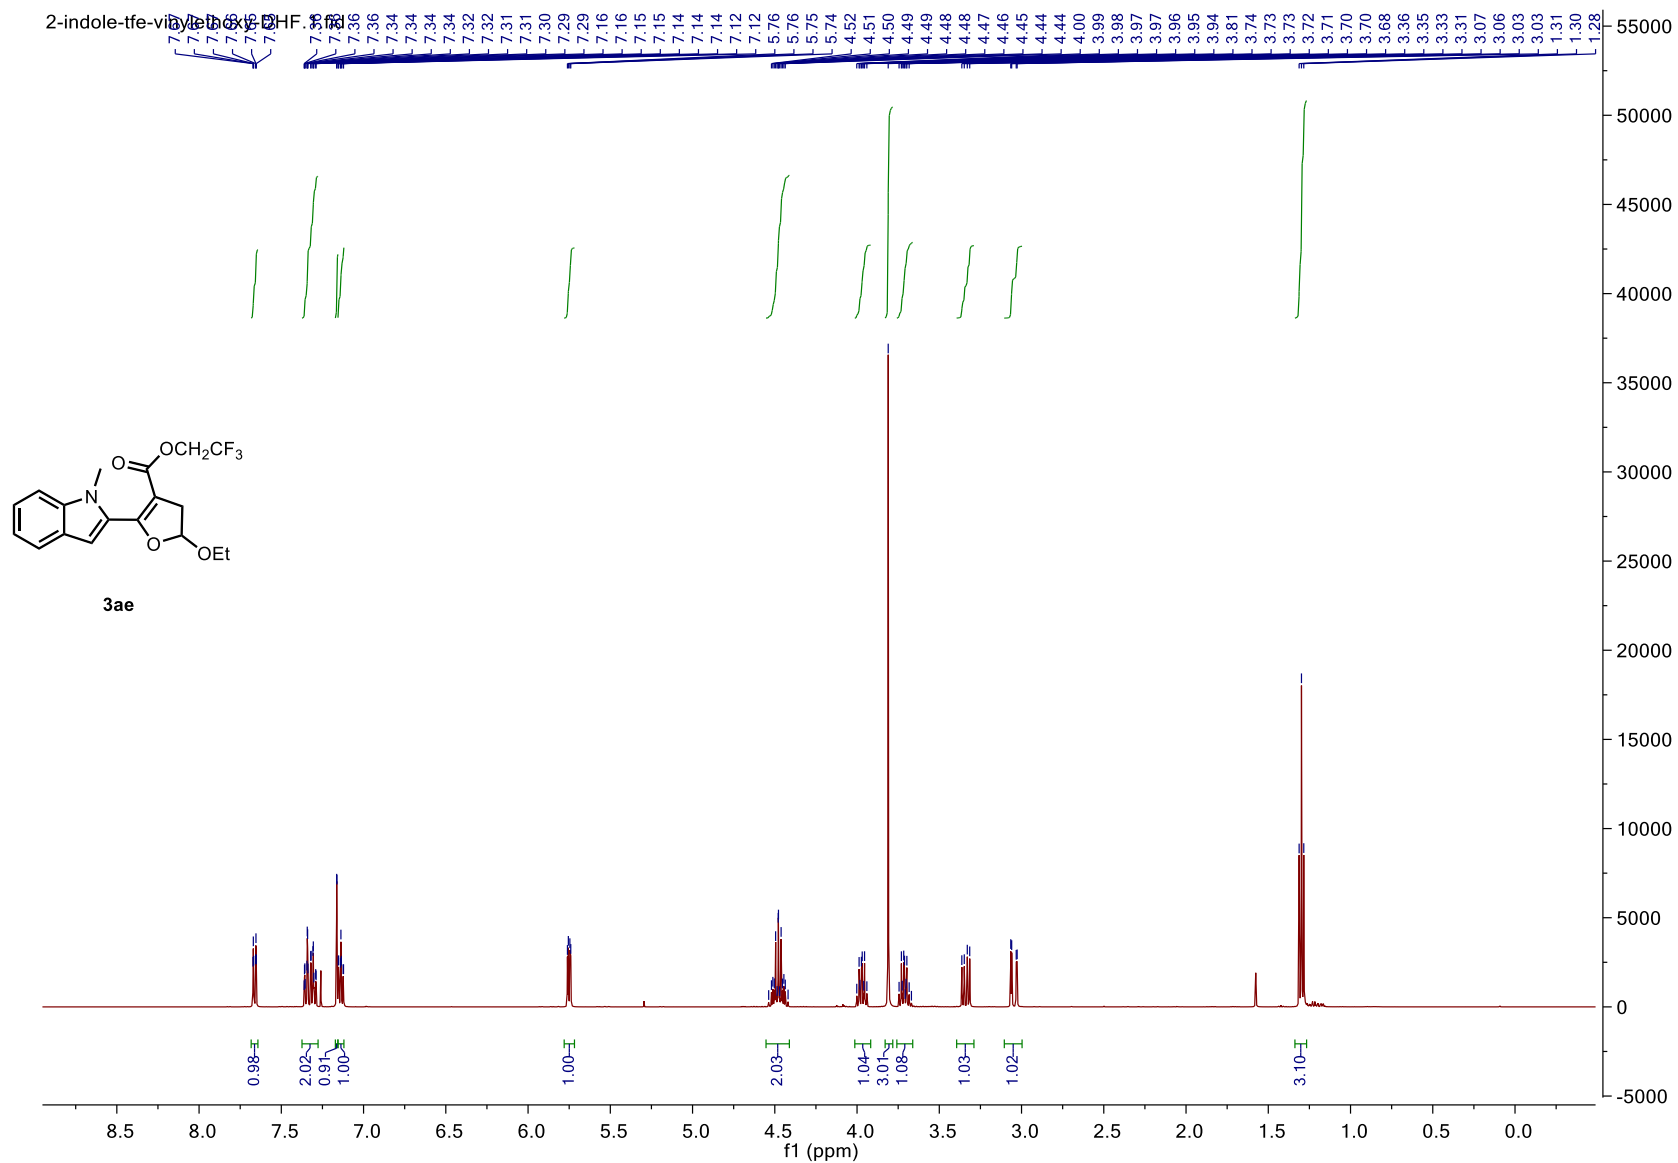

2-indole-tfe-vinylethoxy-DHF-13C.1 fig 6

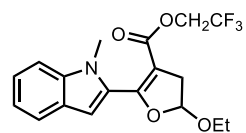

3ae

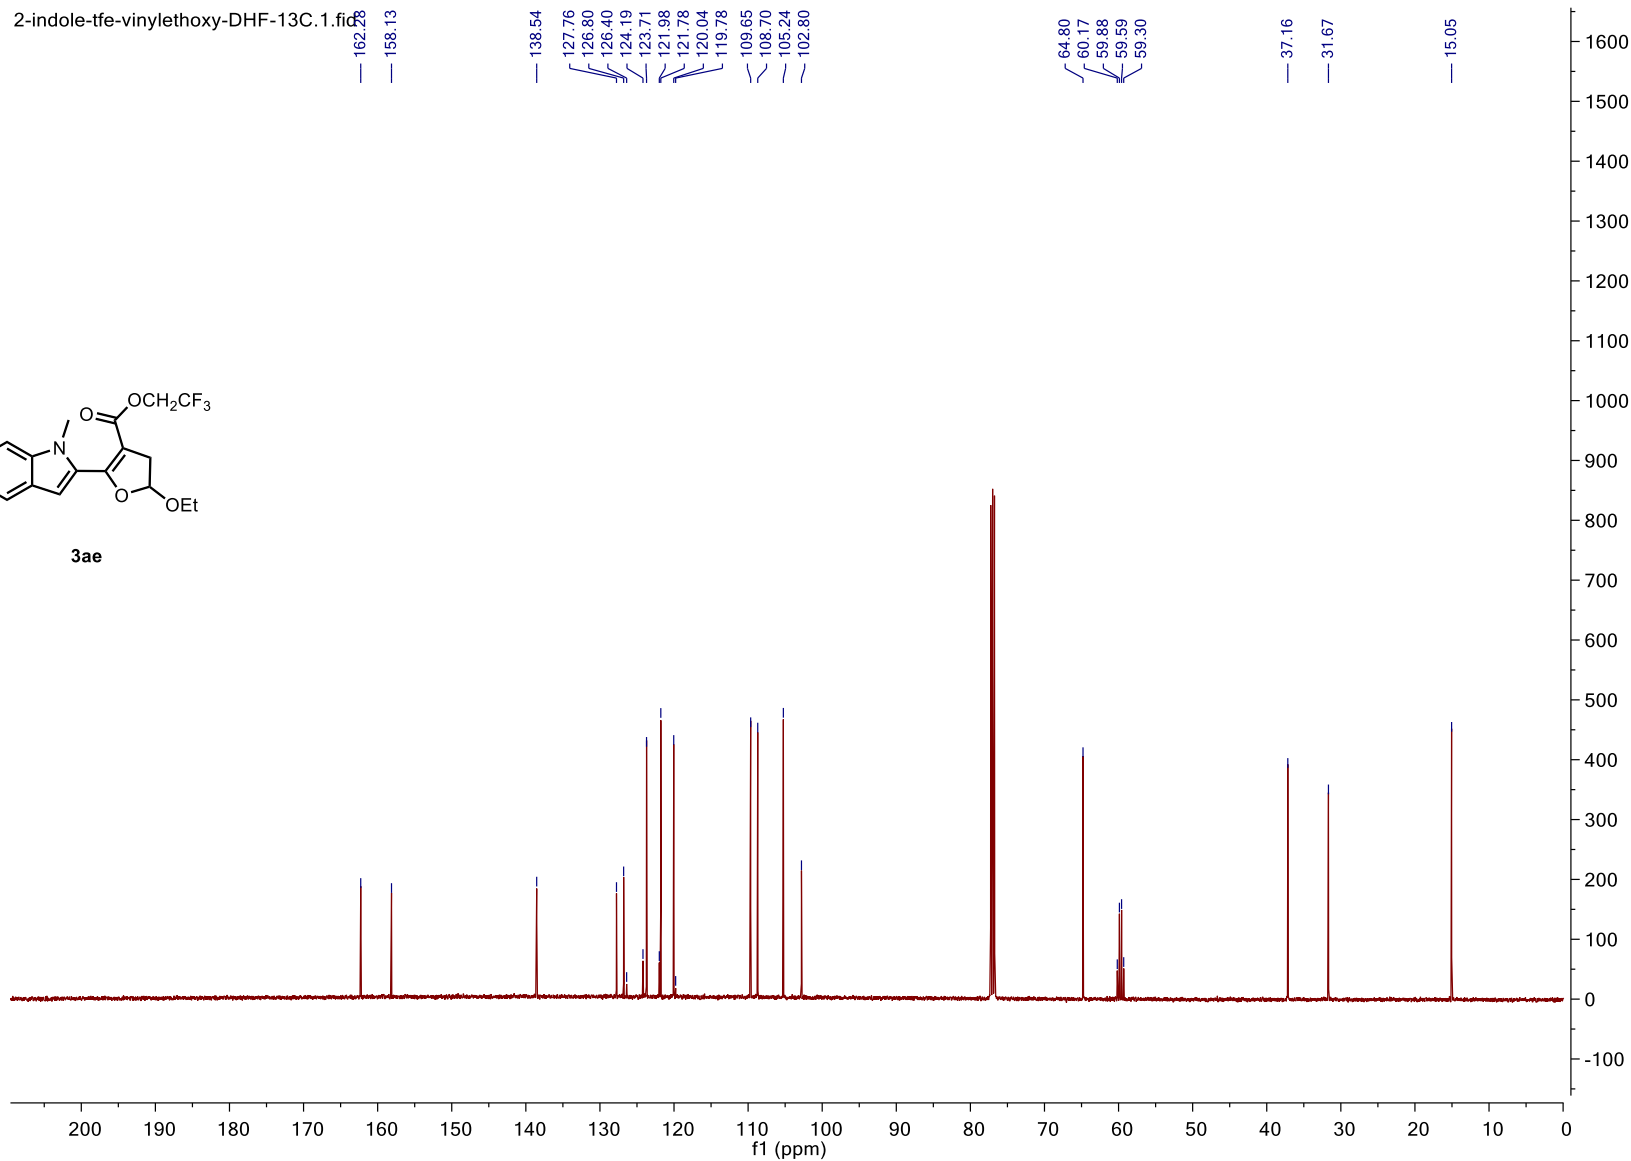

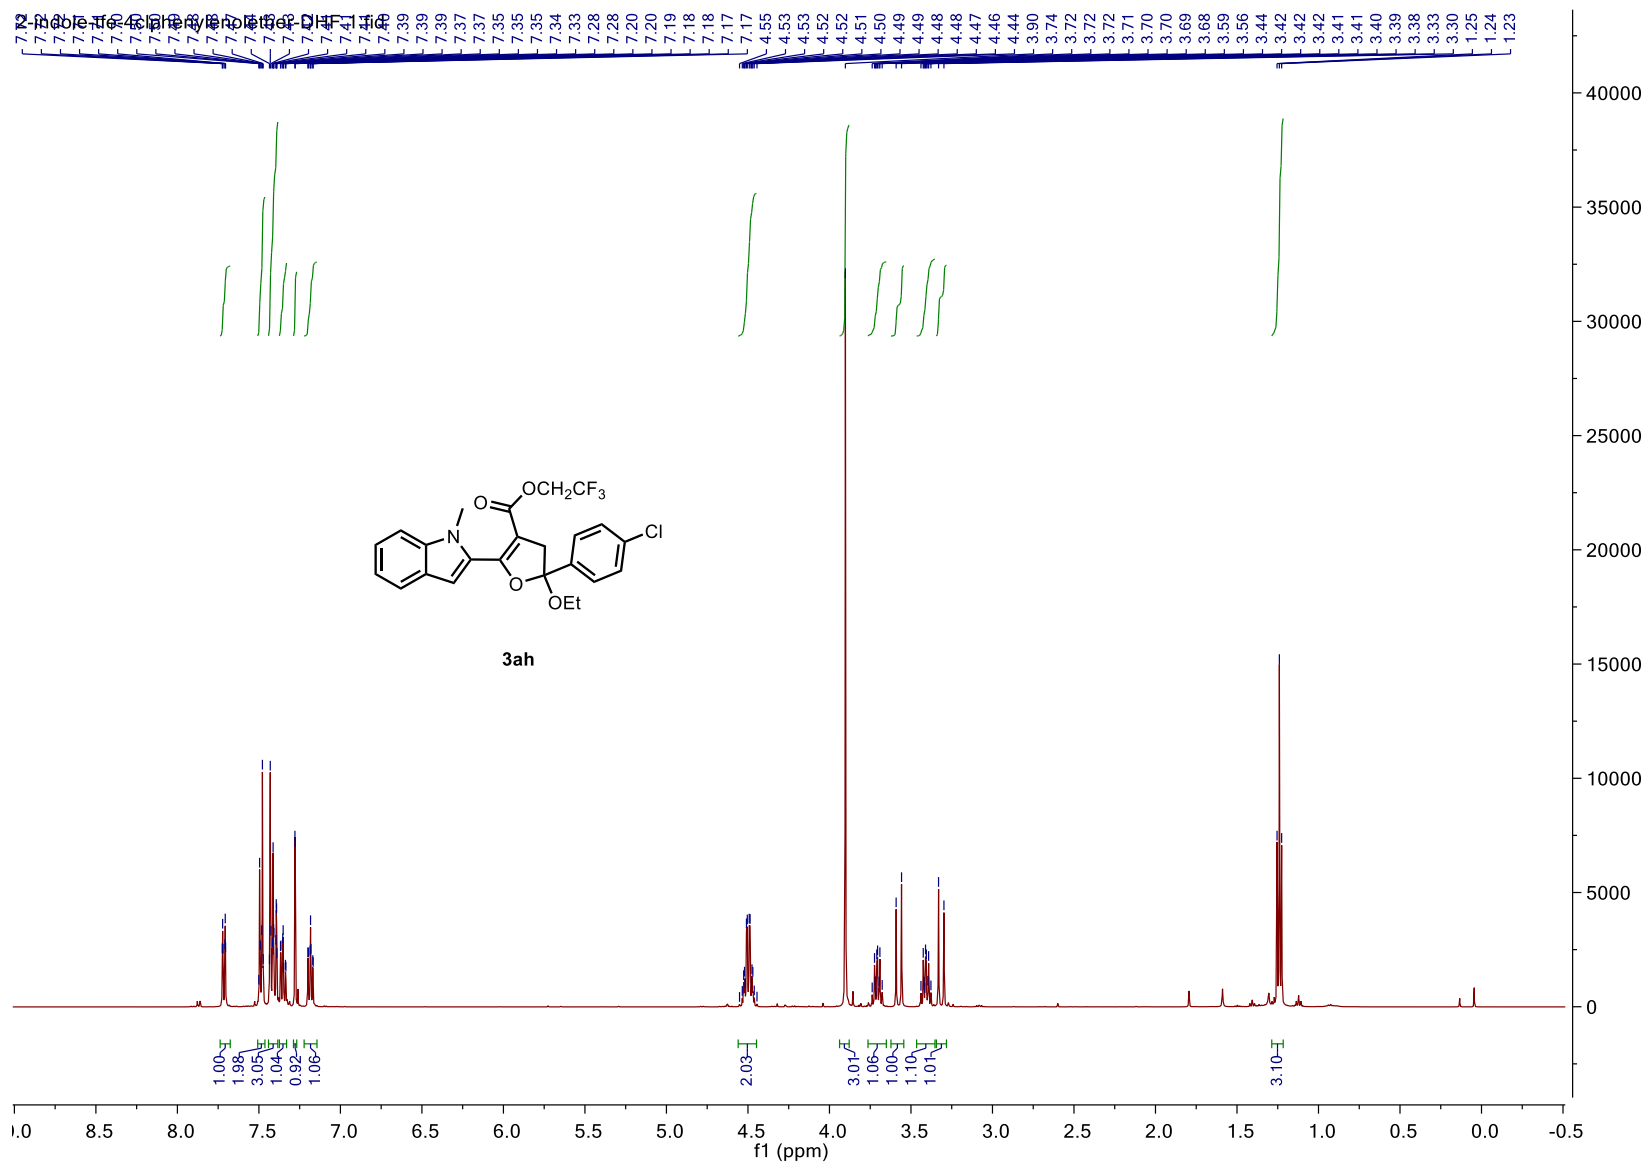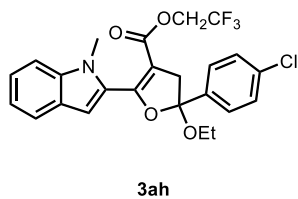

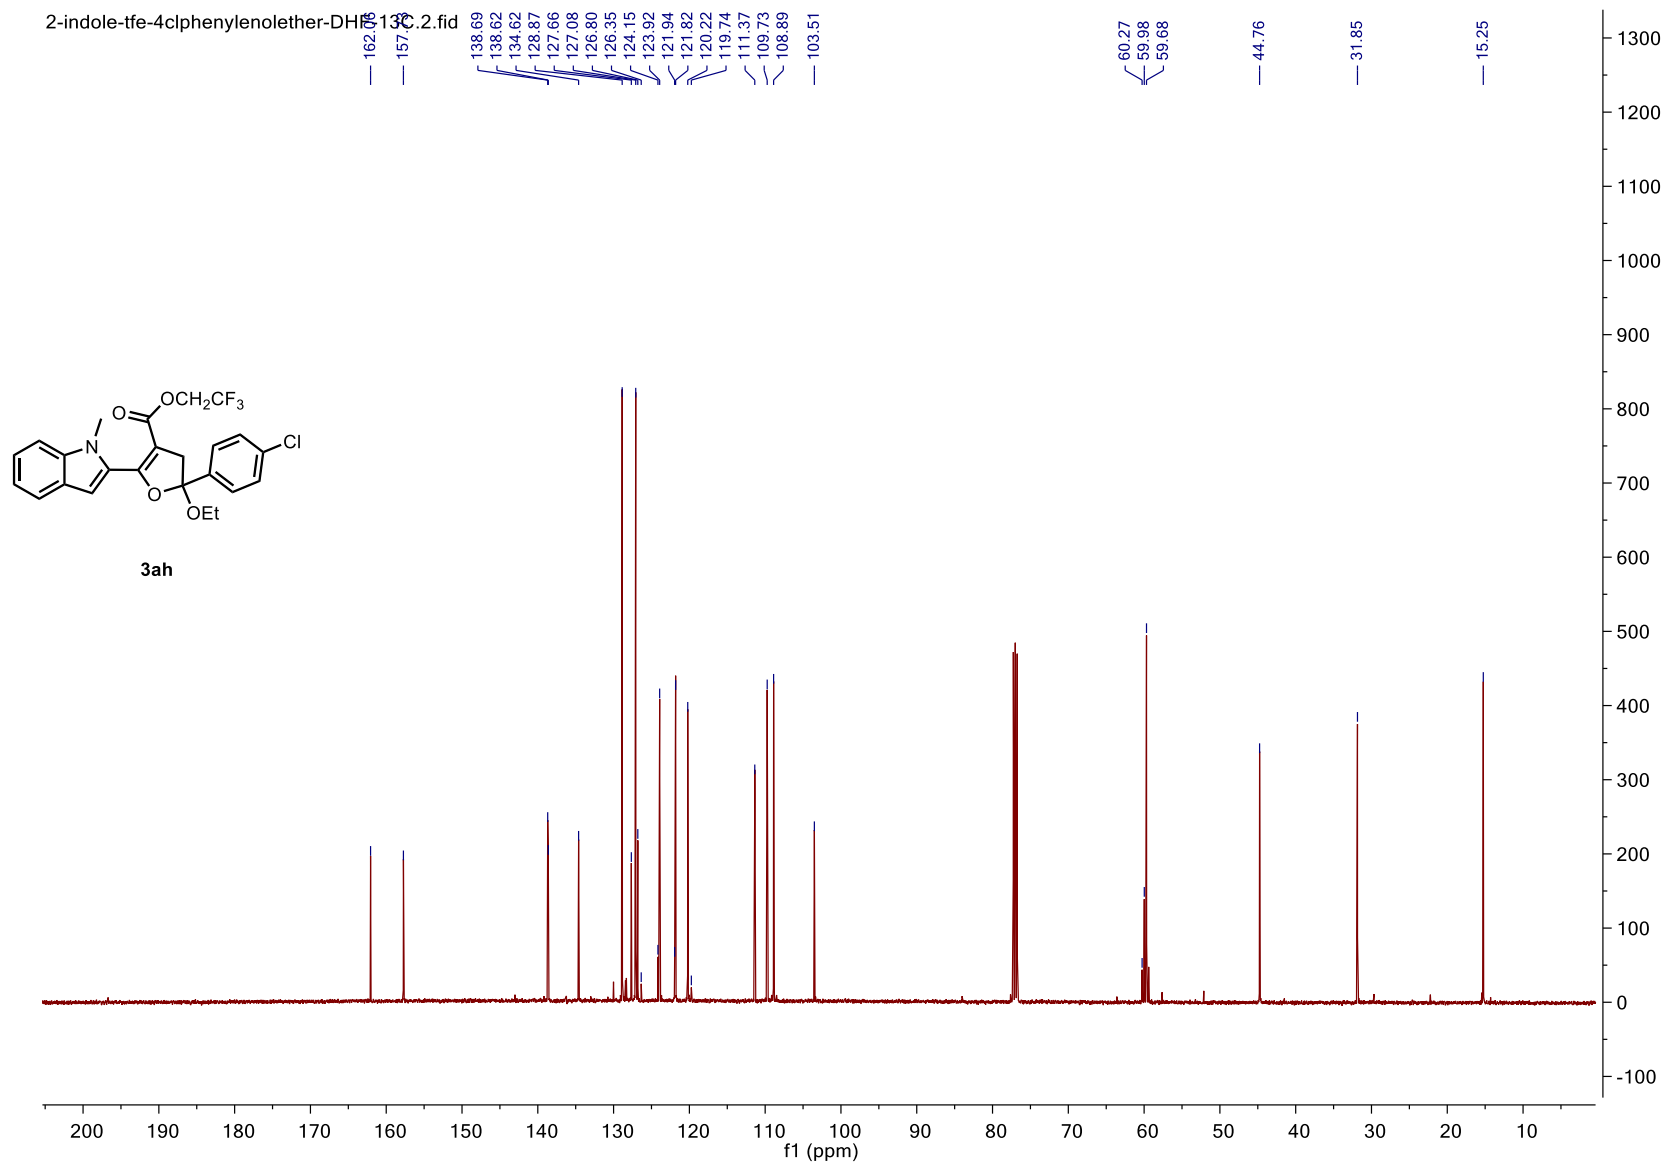

2-indole-tfe-alphaOTMSstyrene-t2.1.fid

**Crude  $^1\text{H}$ NMR of Reaction  
of Diazo 1a and Enol Ether 2i  
(standard reaction conditions)**

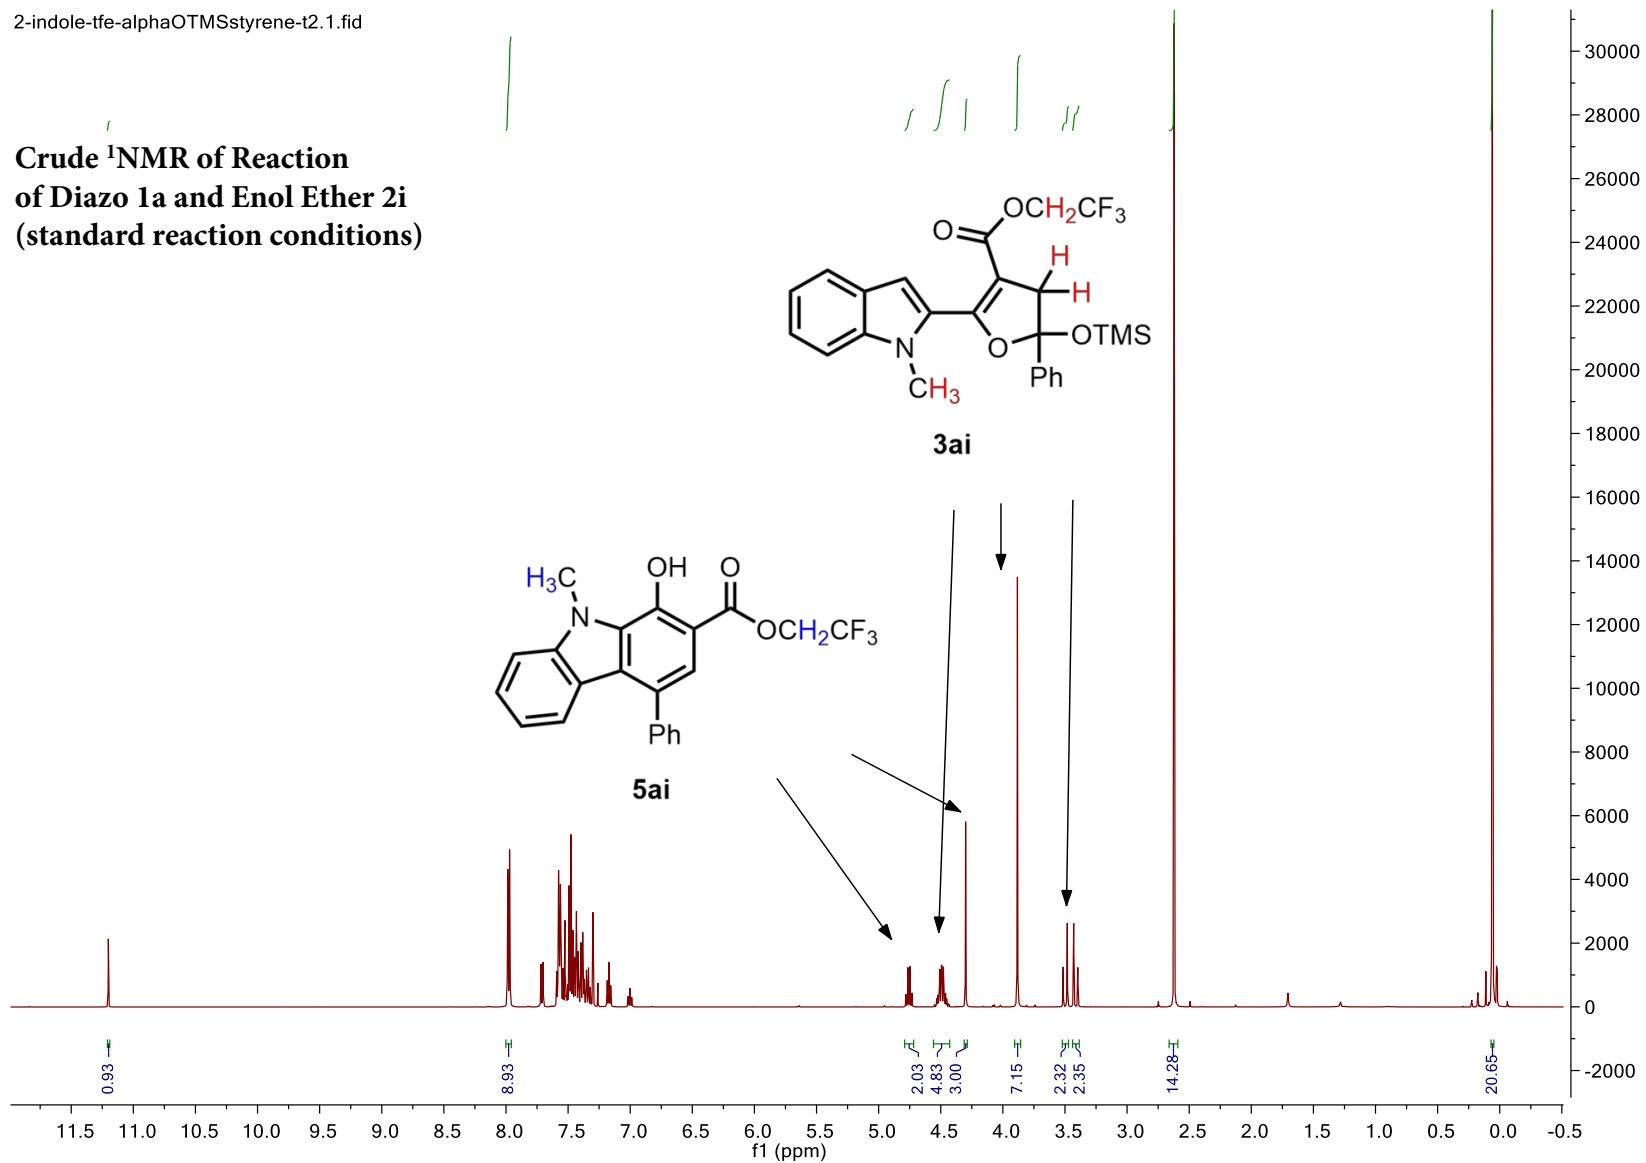

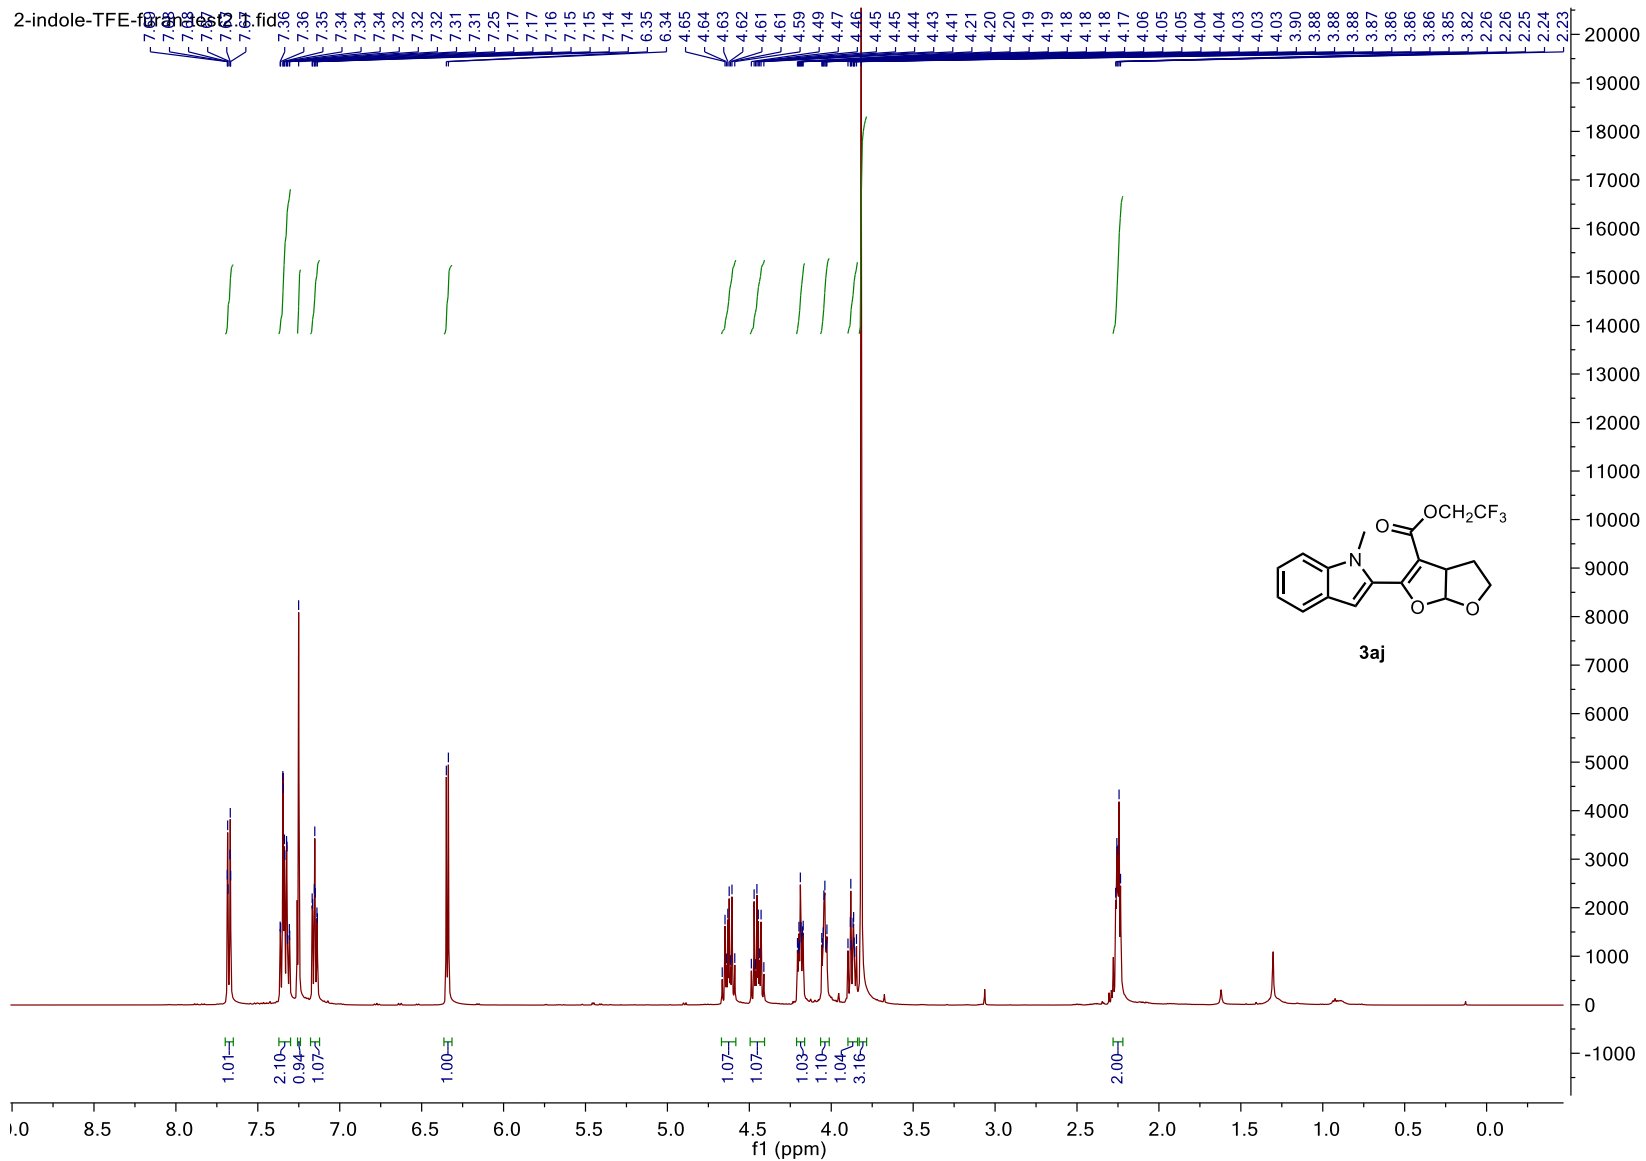

2-indole-TFE-furan-test2-13c.1.fid

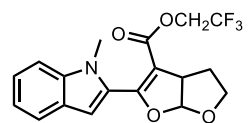

**3aj**

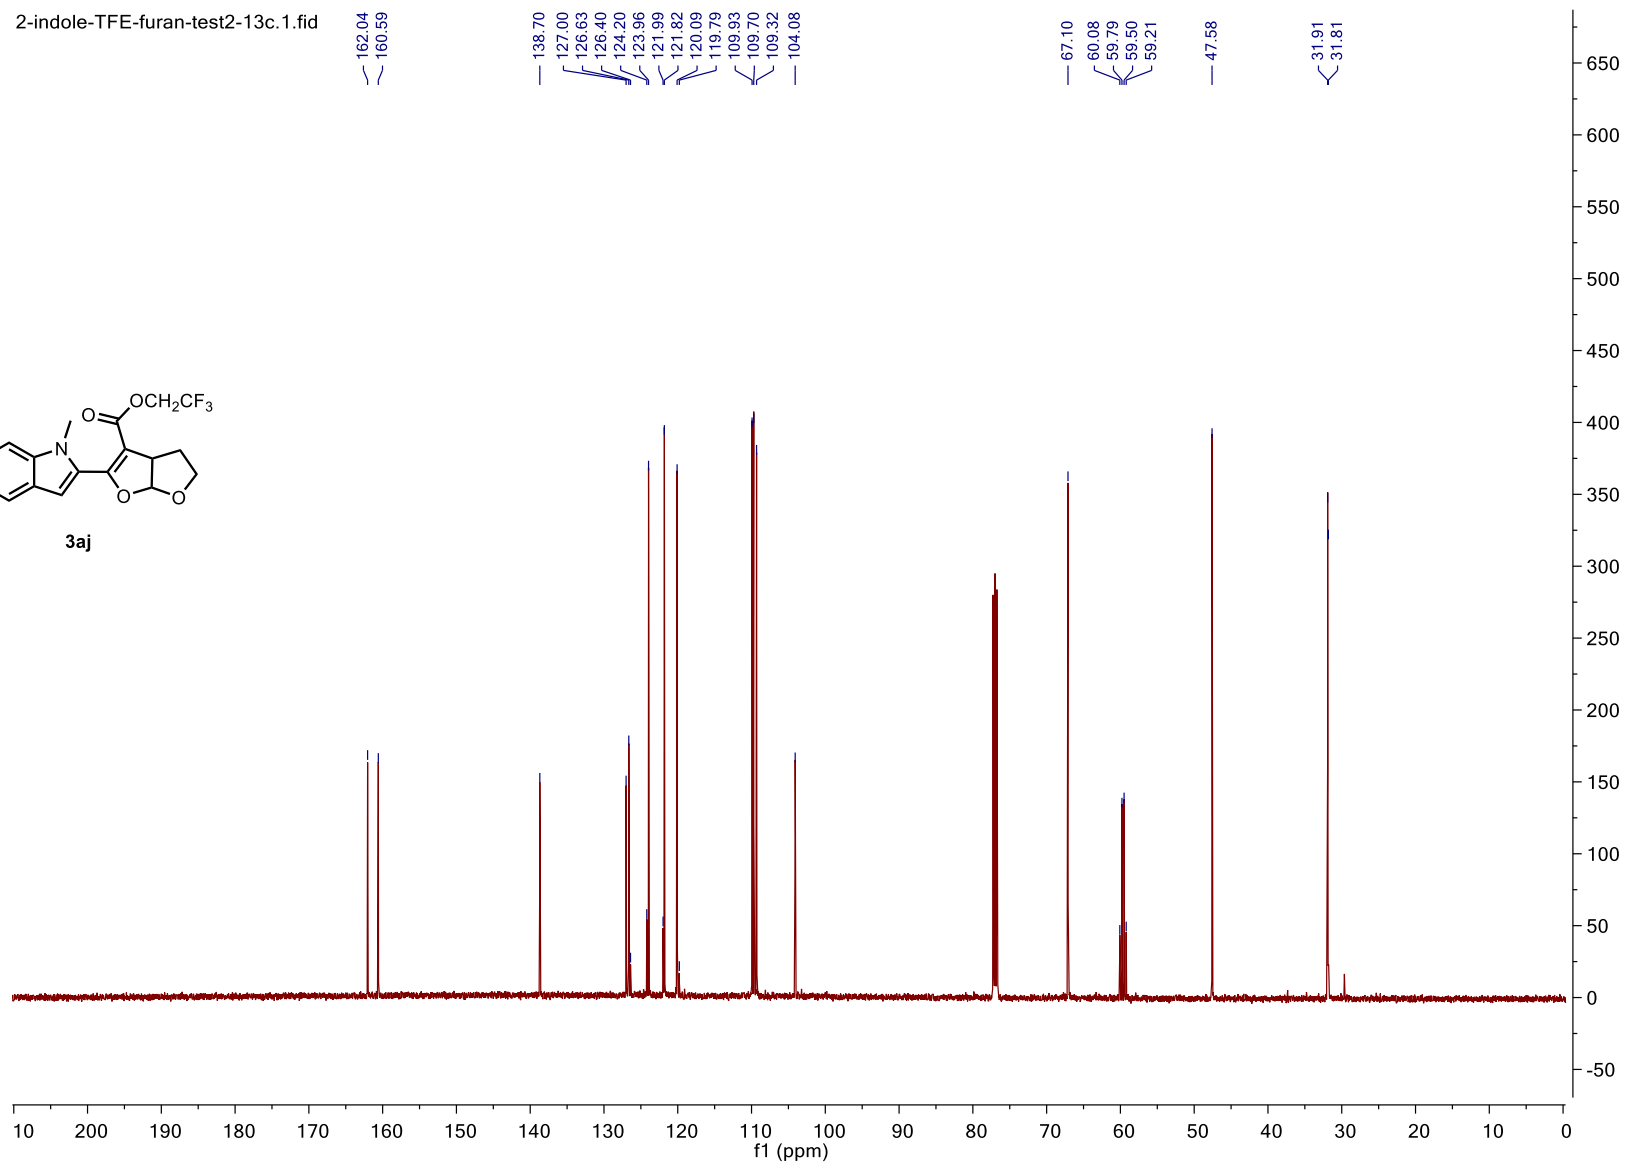

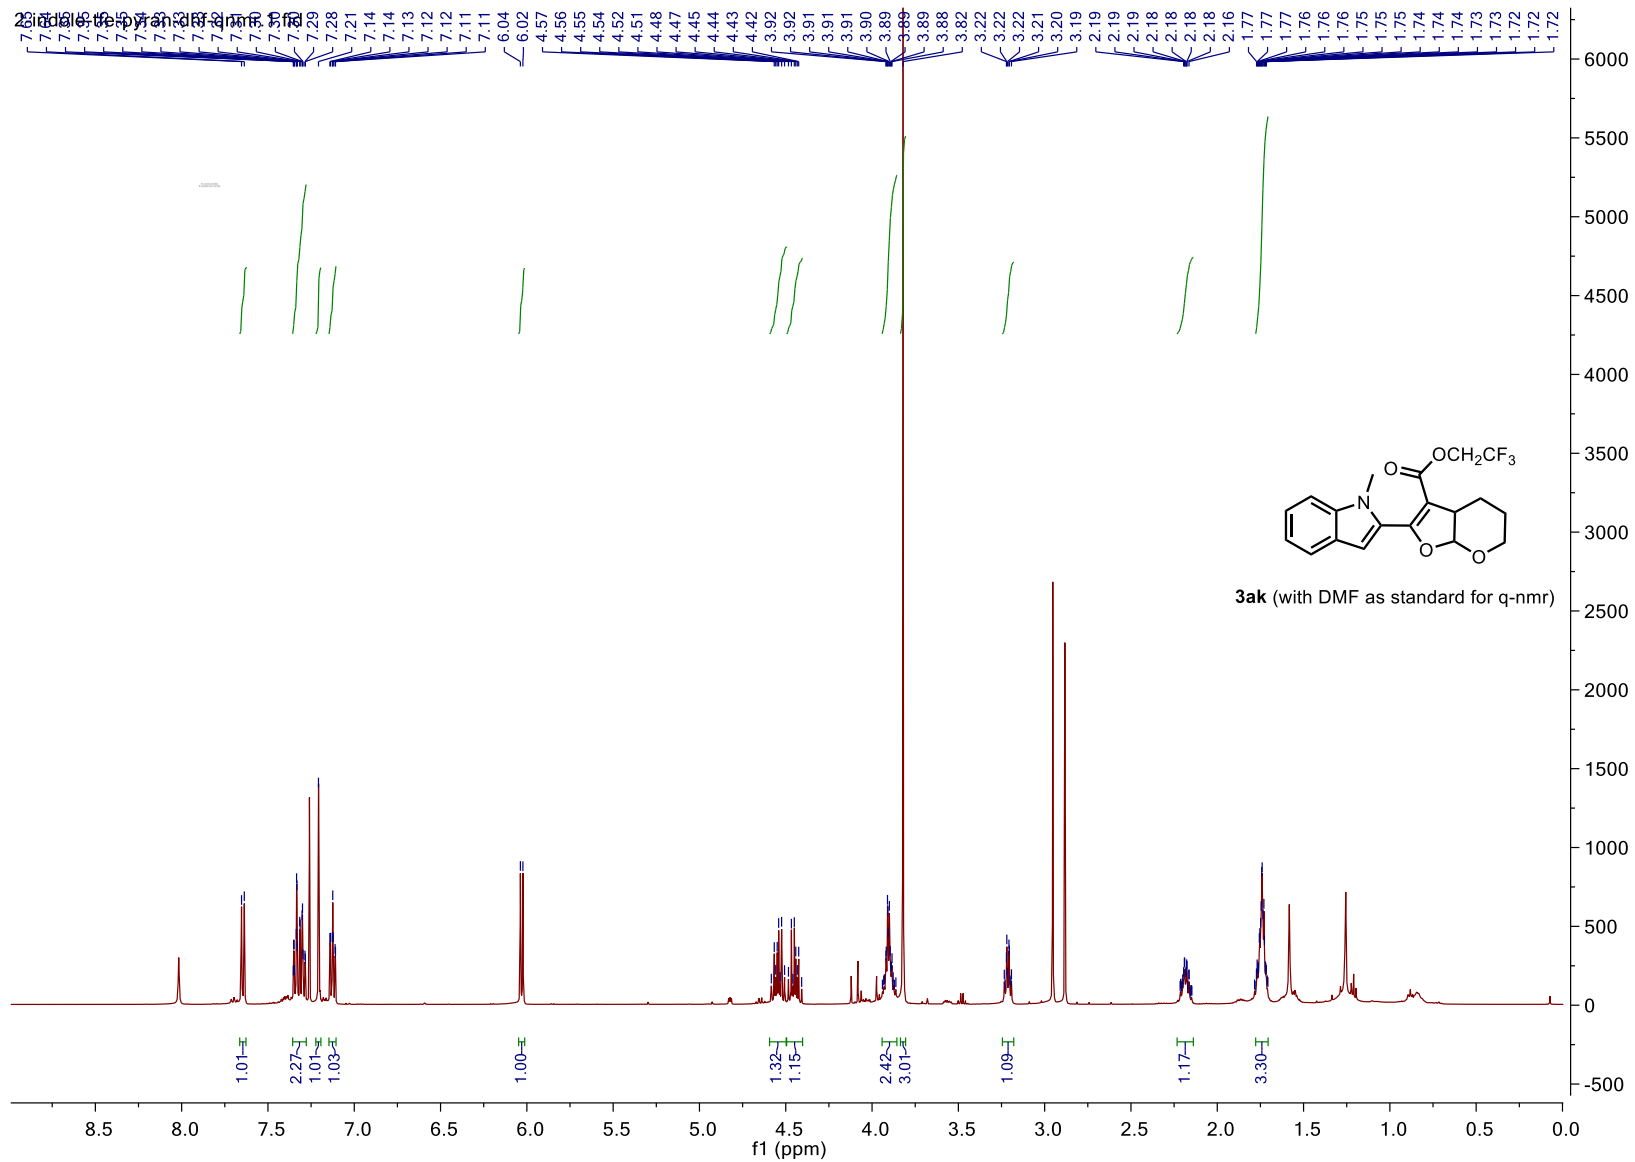



2-indole-tfe-pyran-dhf-qnmr-13c.2.fid

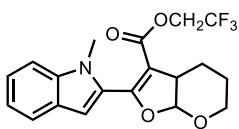

**3ak** (with DMF as standard for q-nmr)

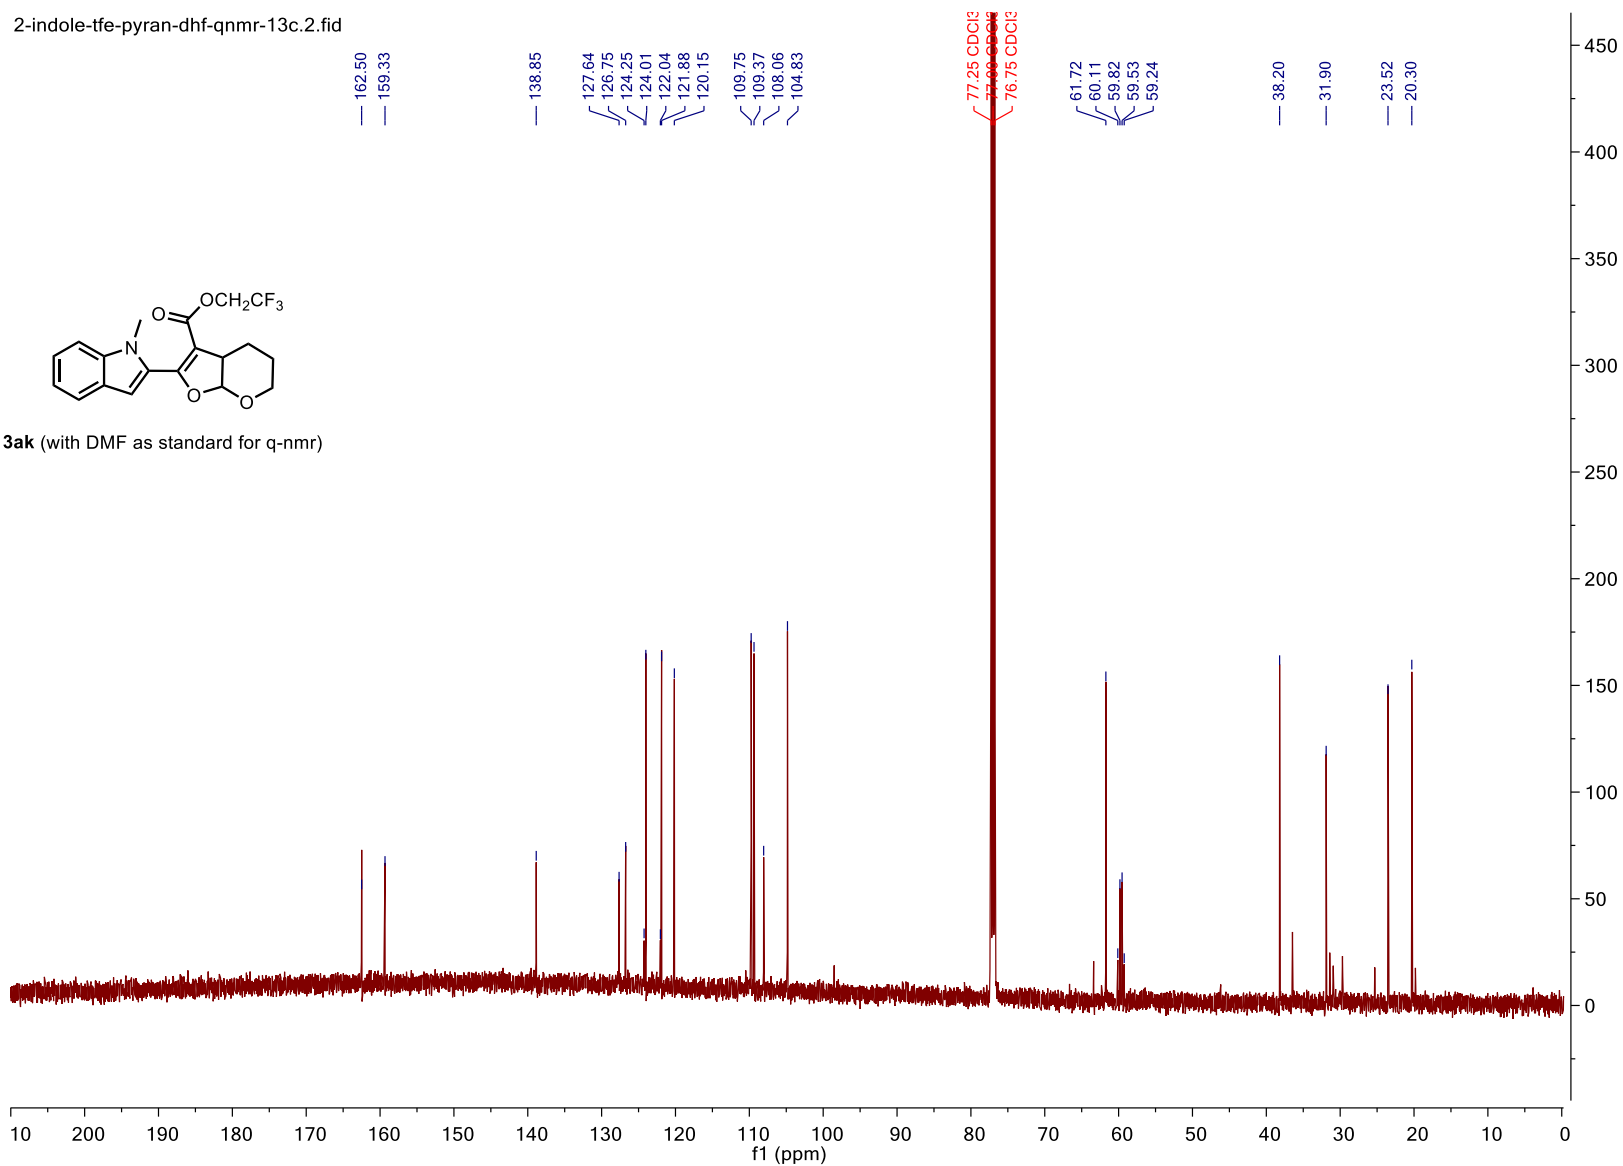

2-indole-tfe-methylfuran-np-s2s3.2.fid

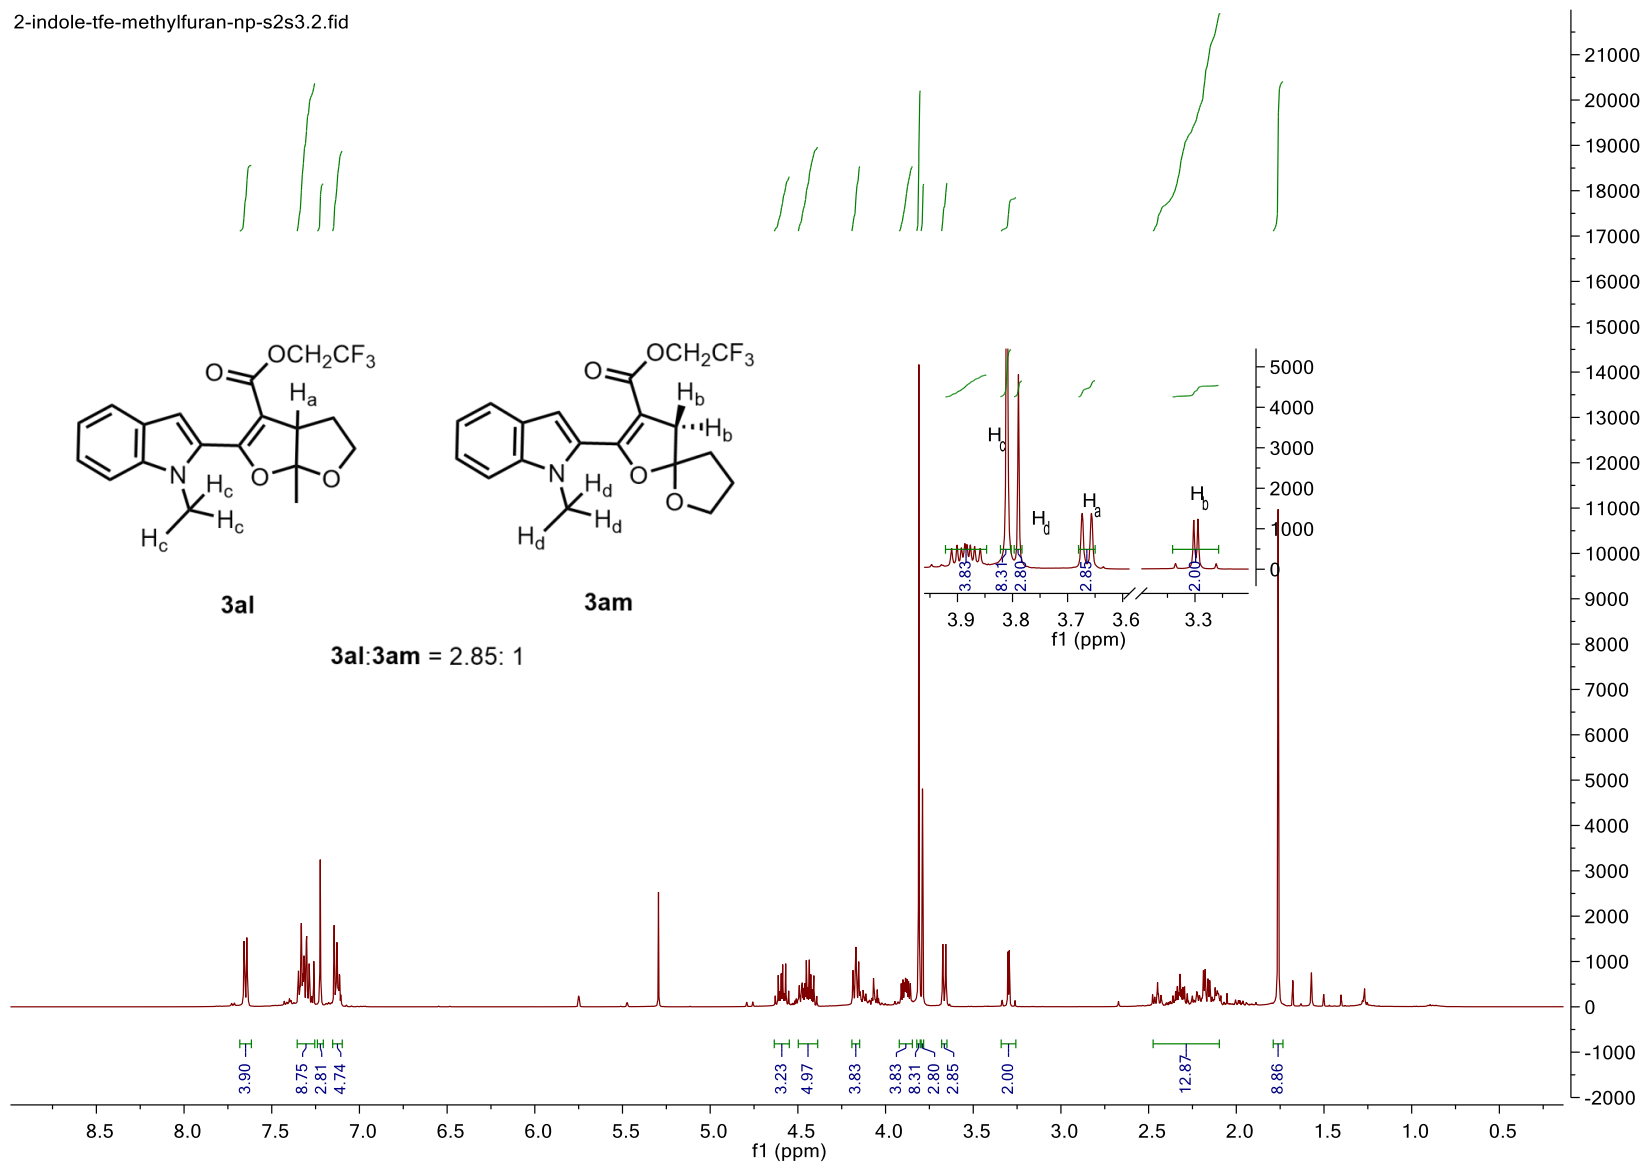

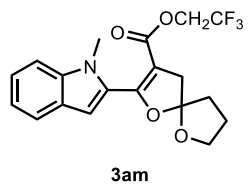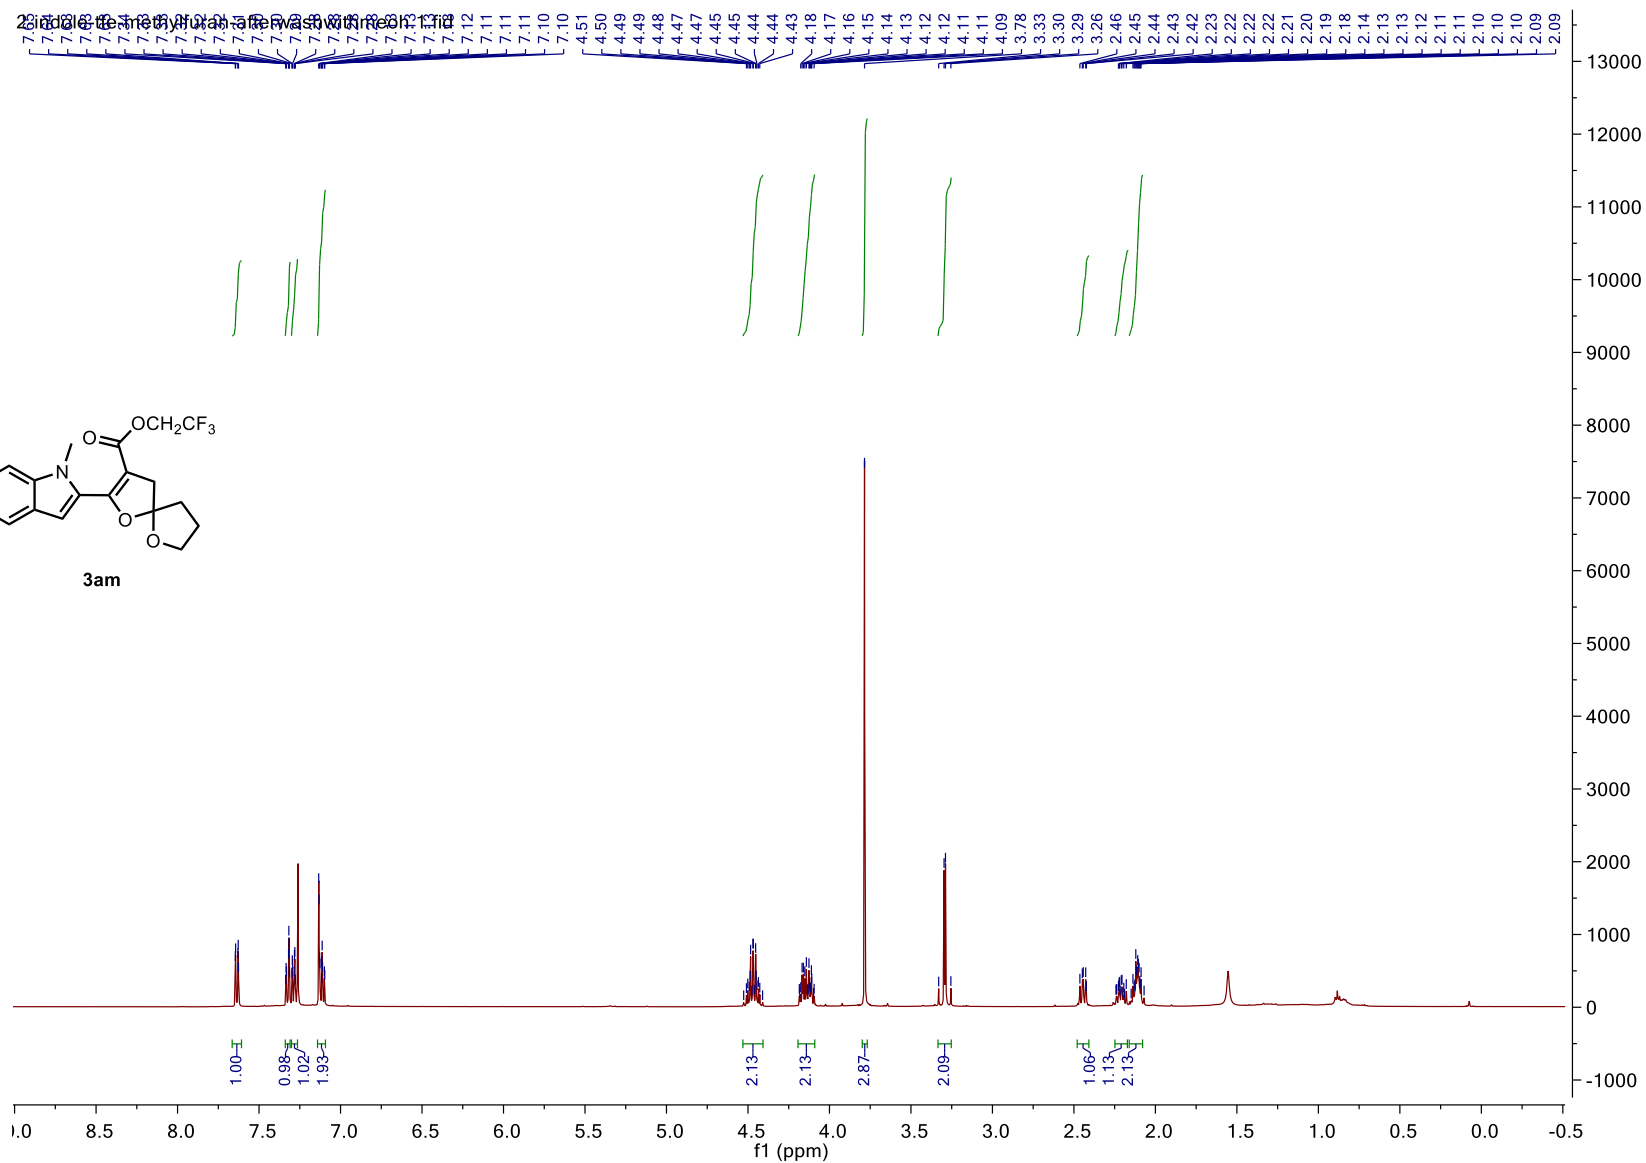

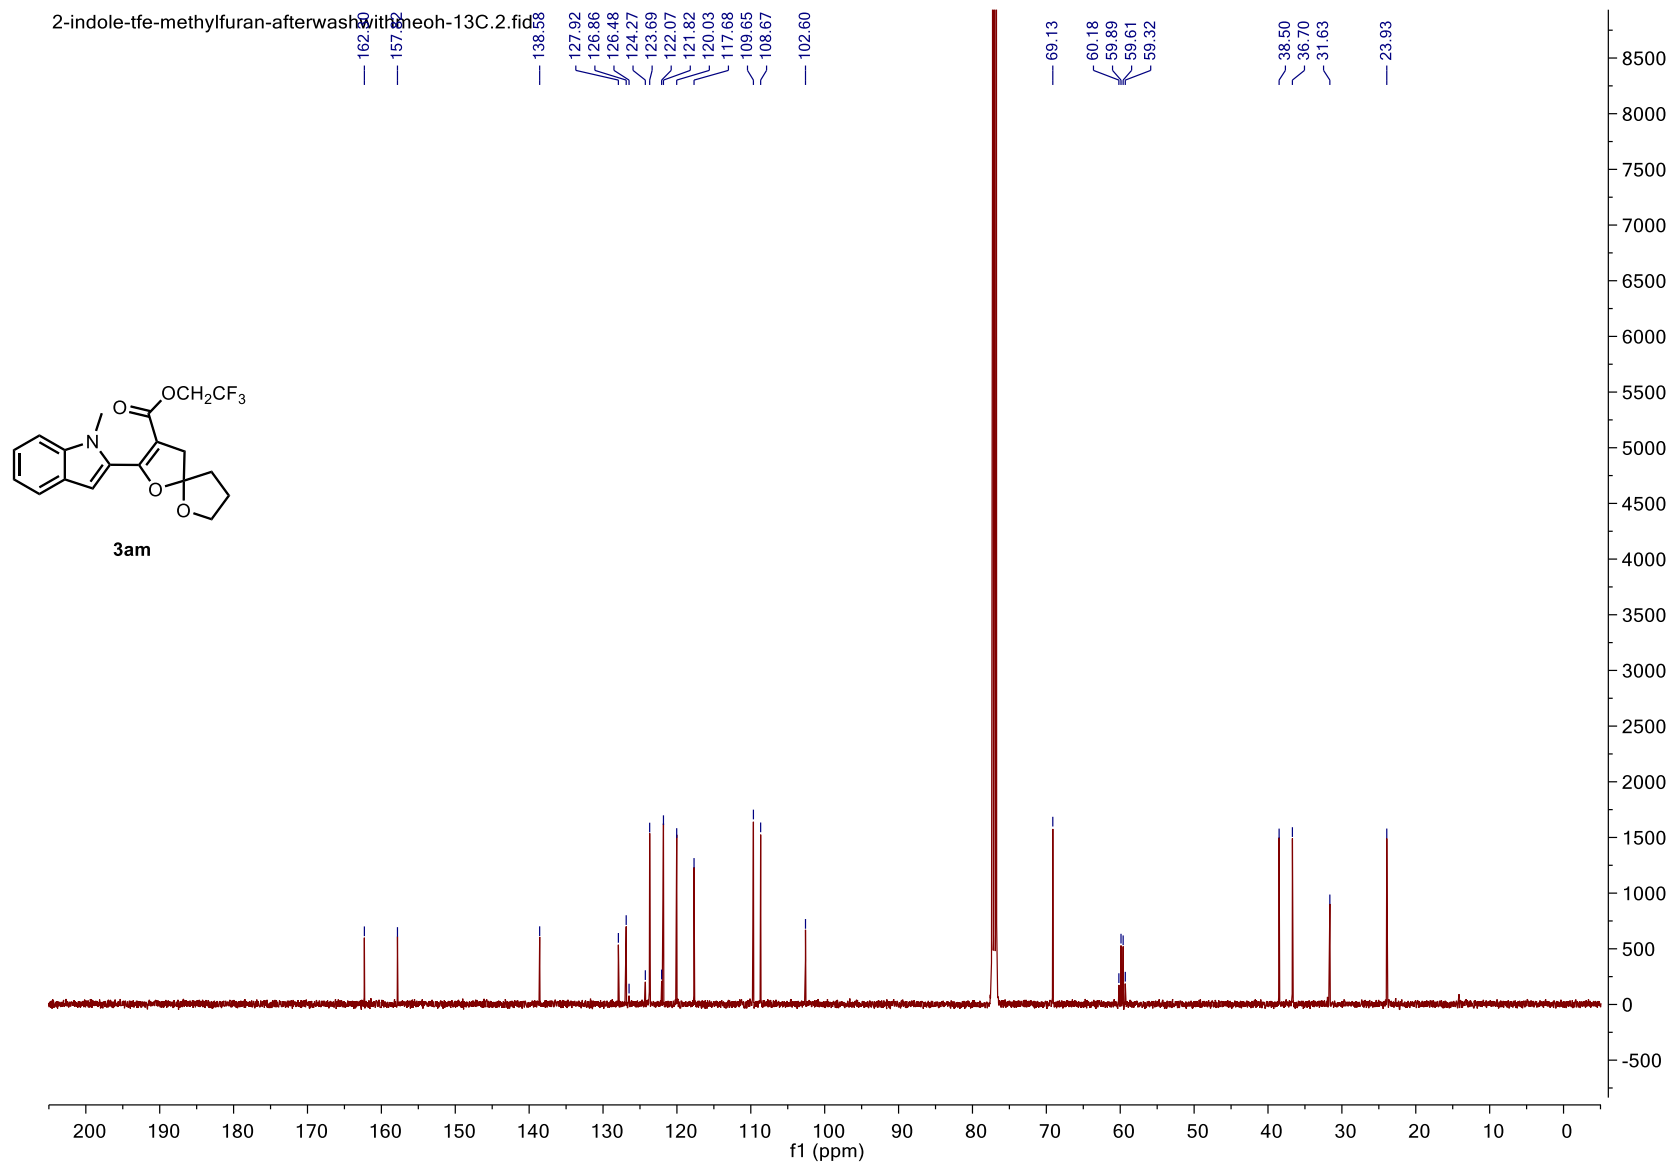

GF\_5\_60B\_C1S12.fid

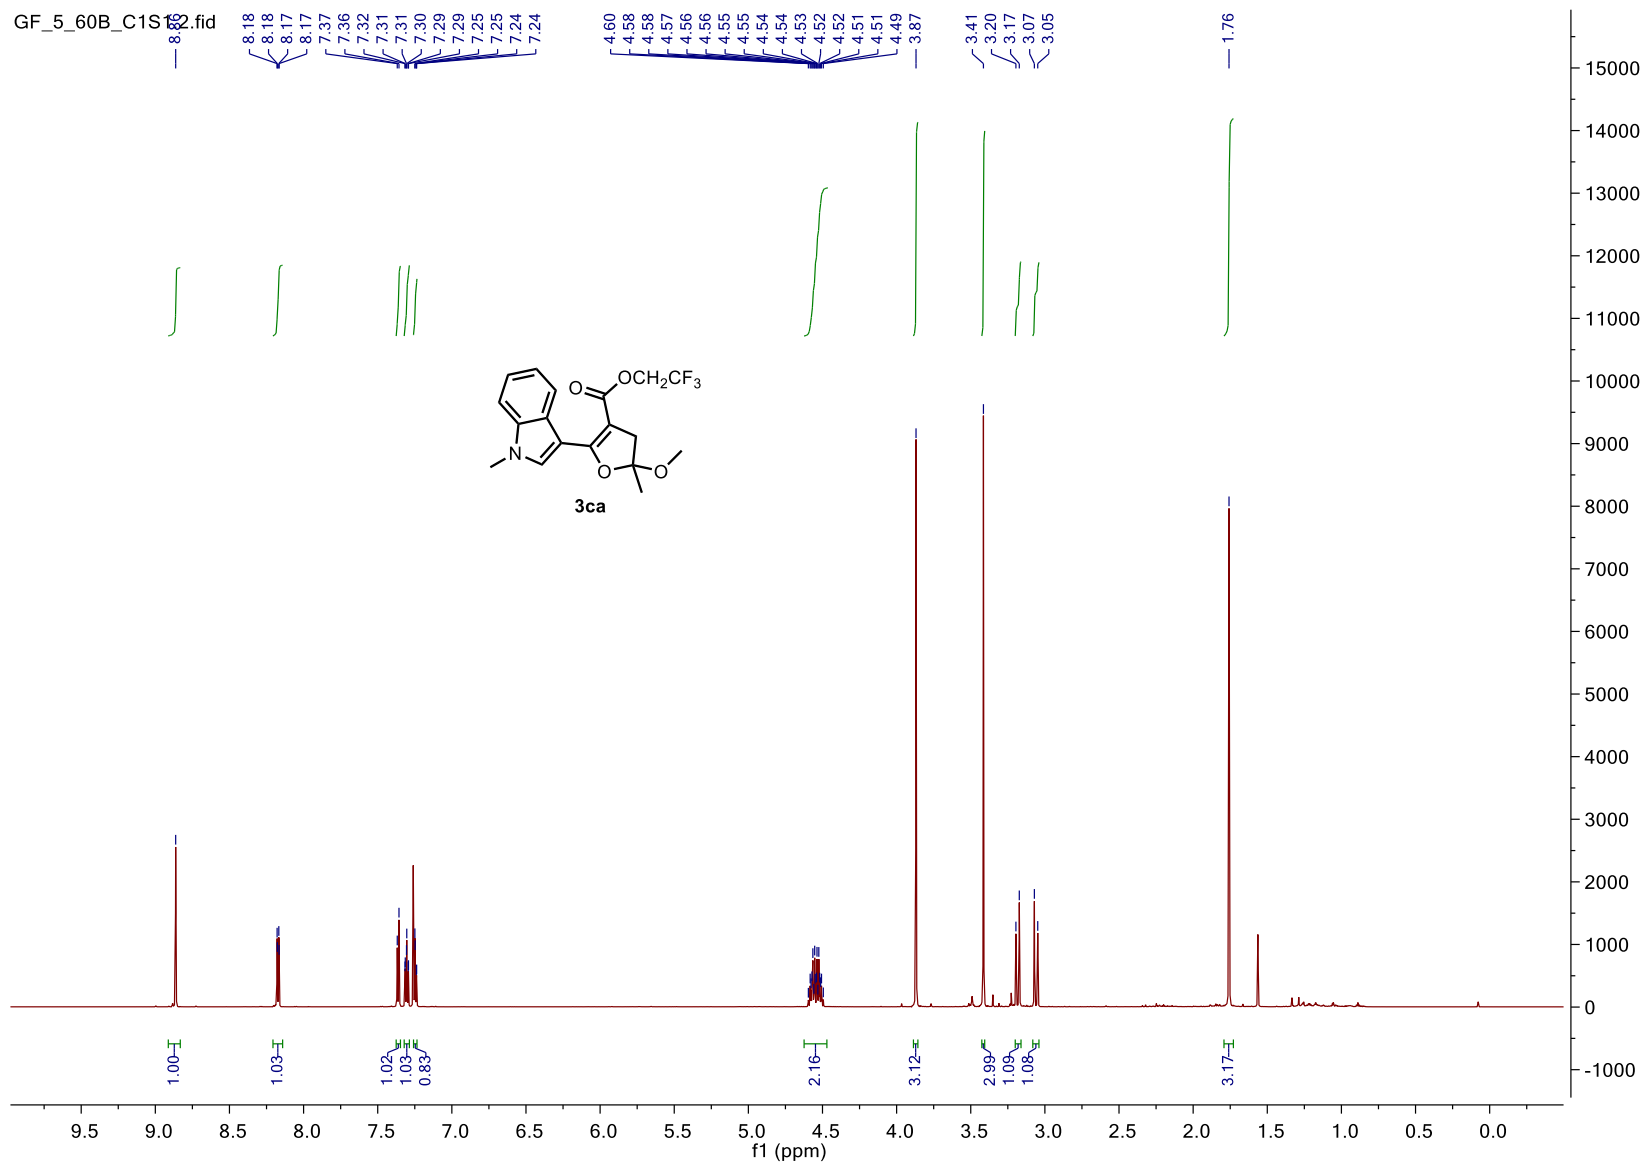

GF\_5\_60B\_C1S1.1.fid

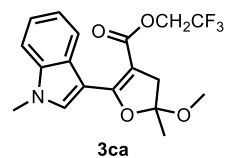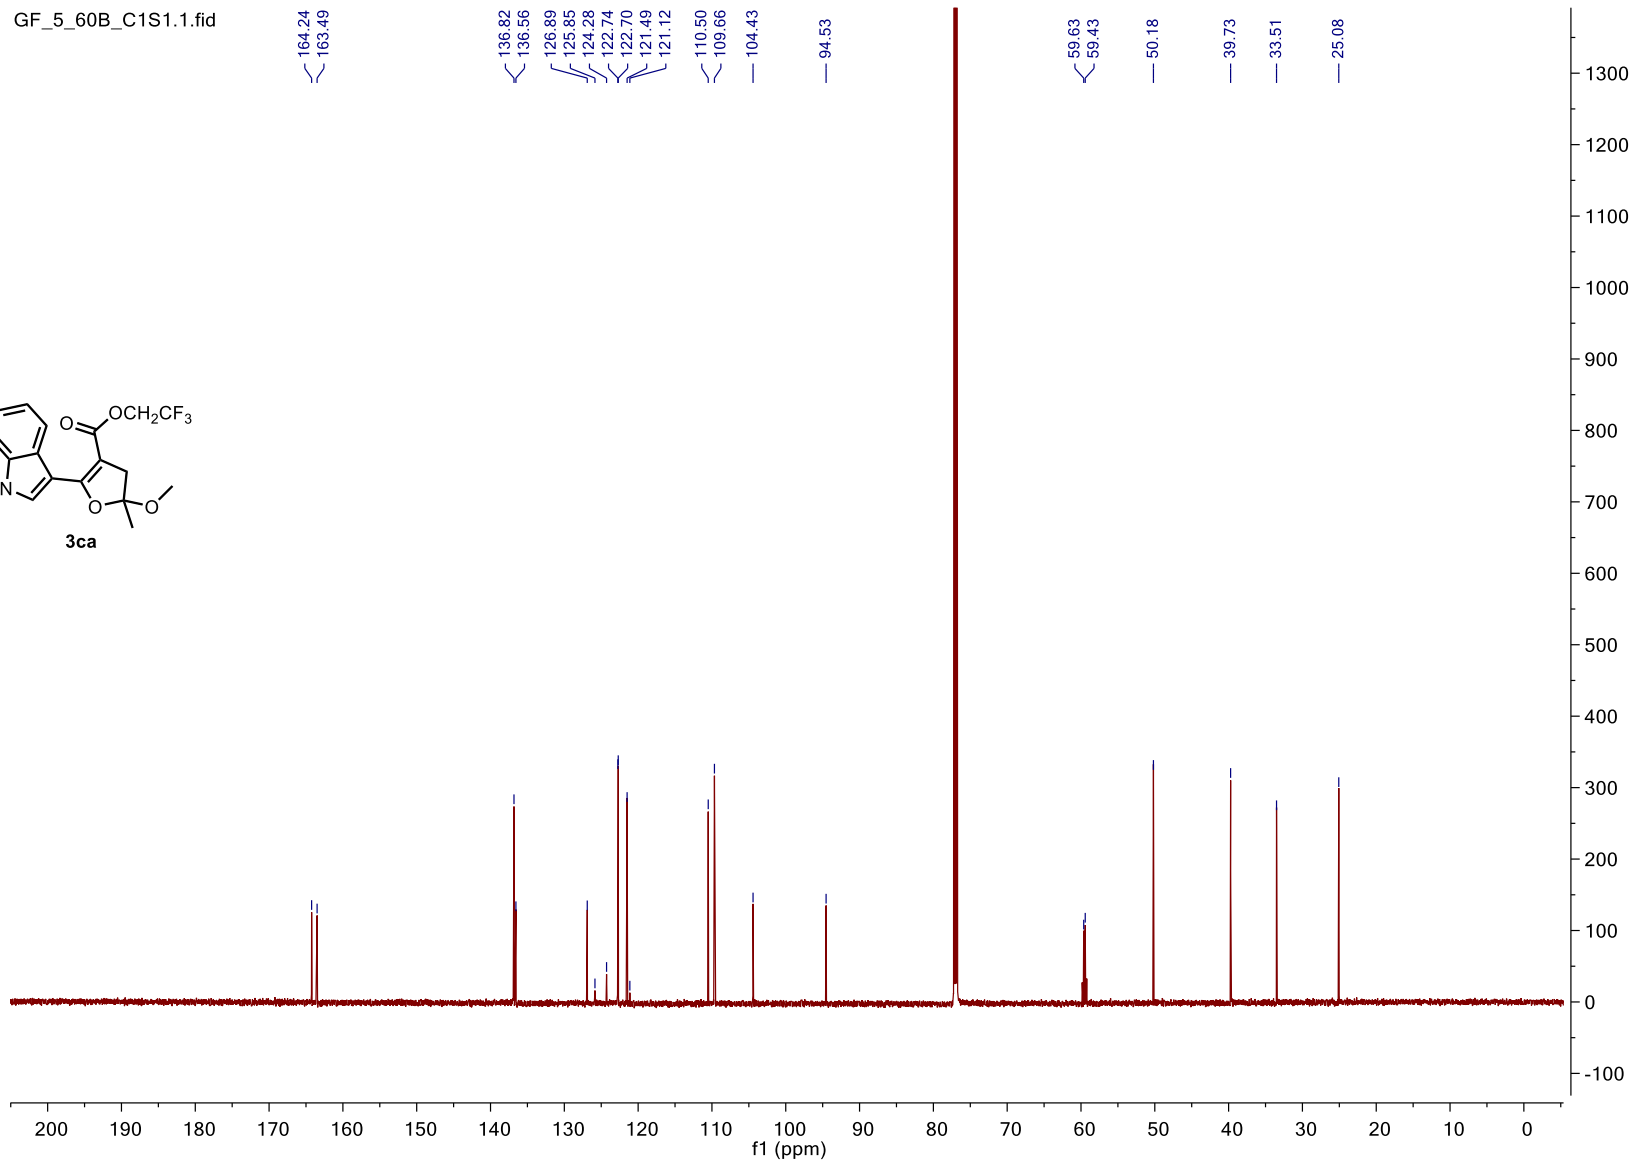

GF\_C(2)\_C\_6O2TFE.1.fid

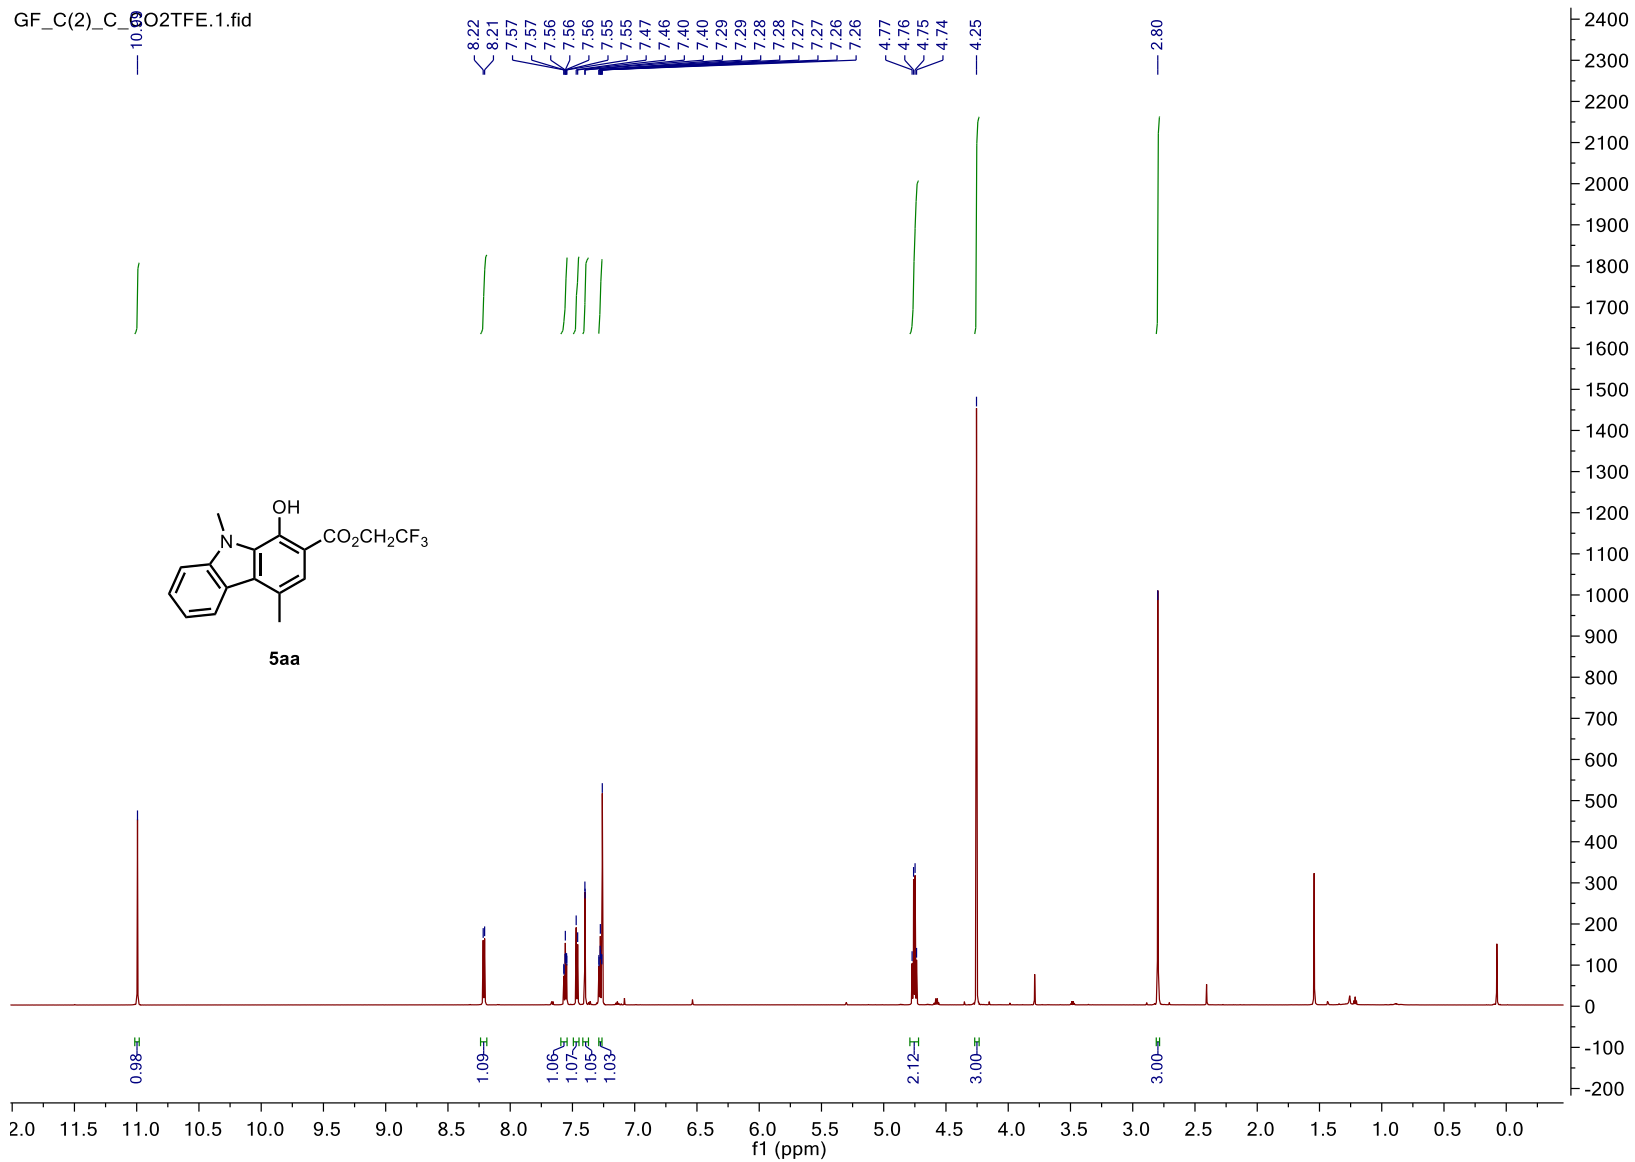

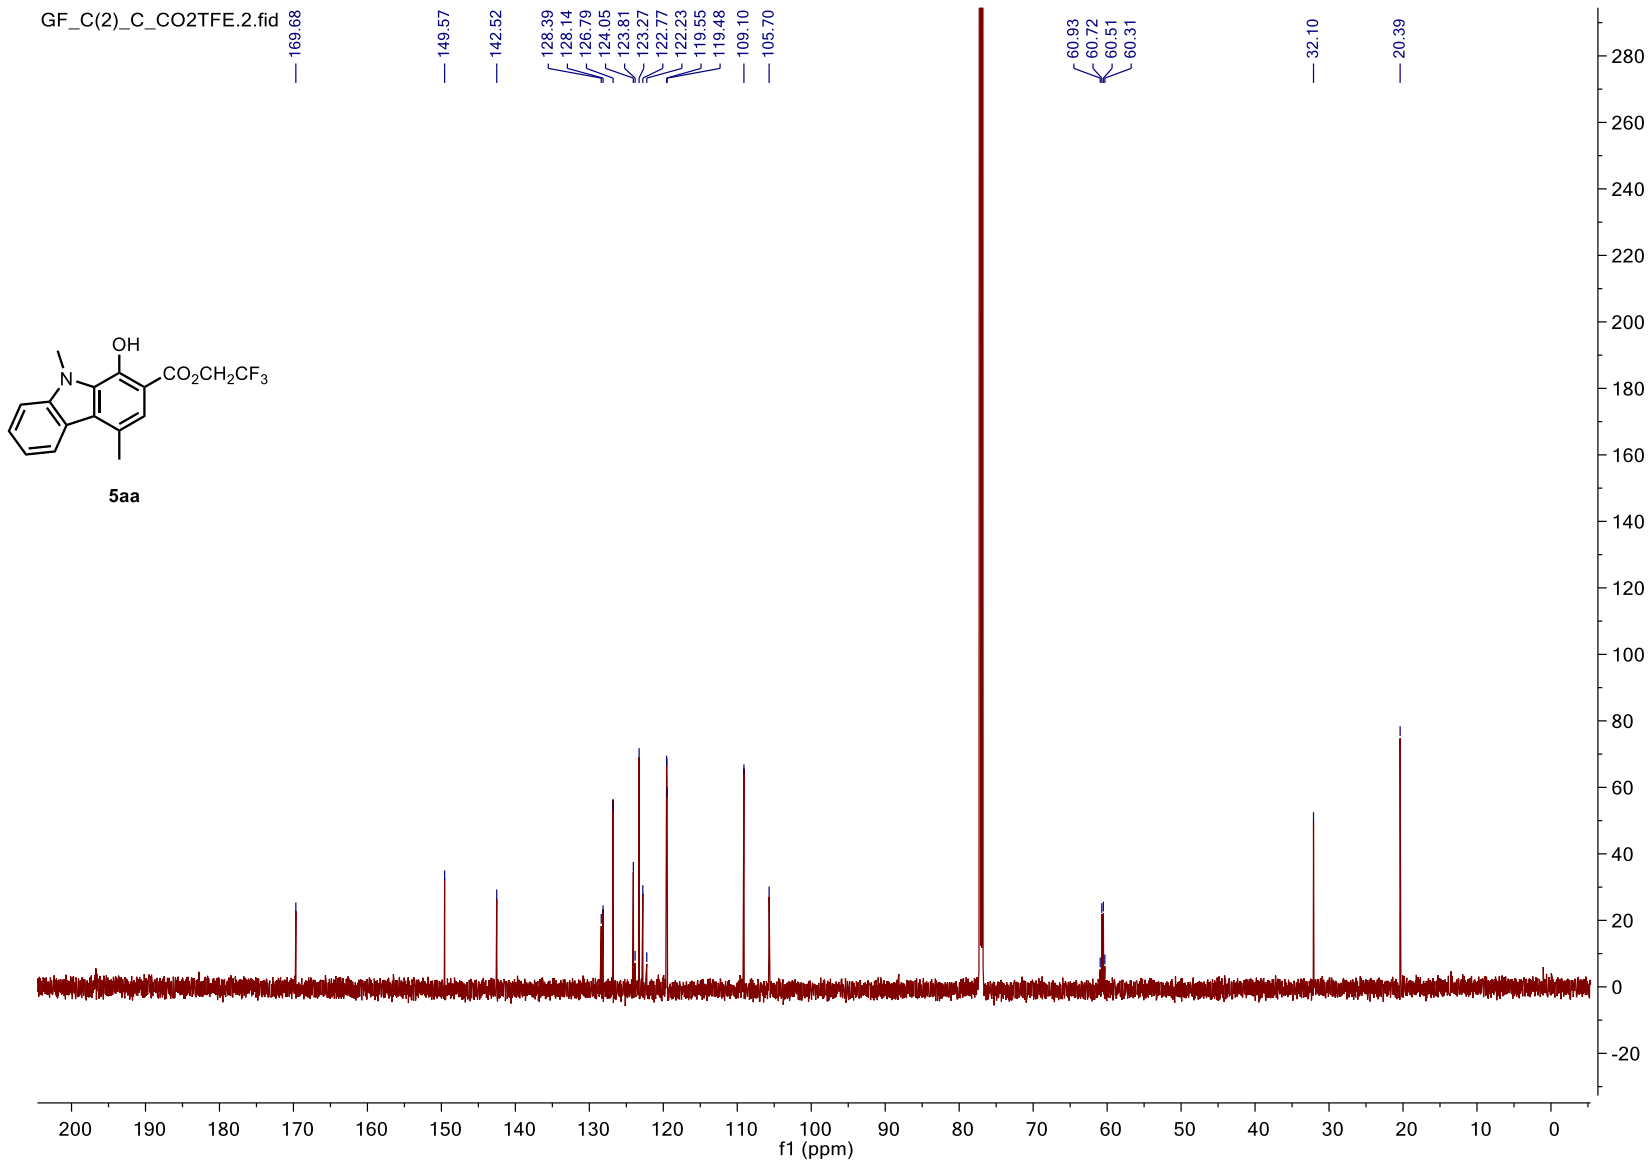



2-indole-tfe-methoxypropene-carb-19F.2.fid

-73.42  
-73.44  
-73.45

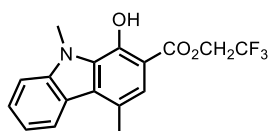

5aa

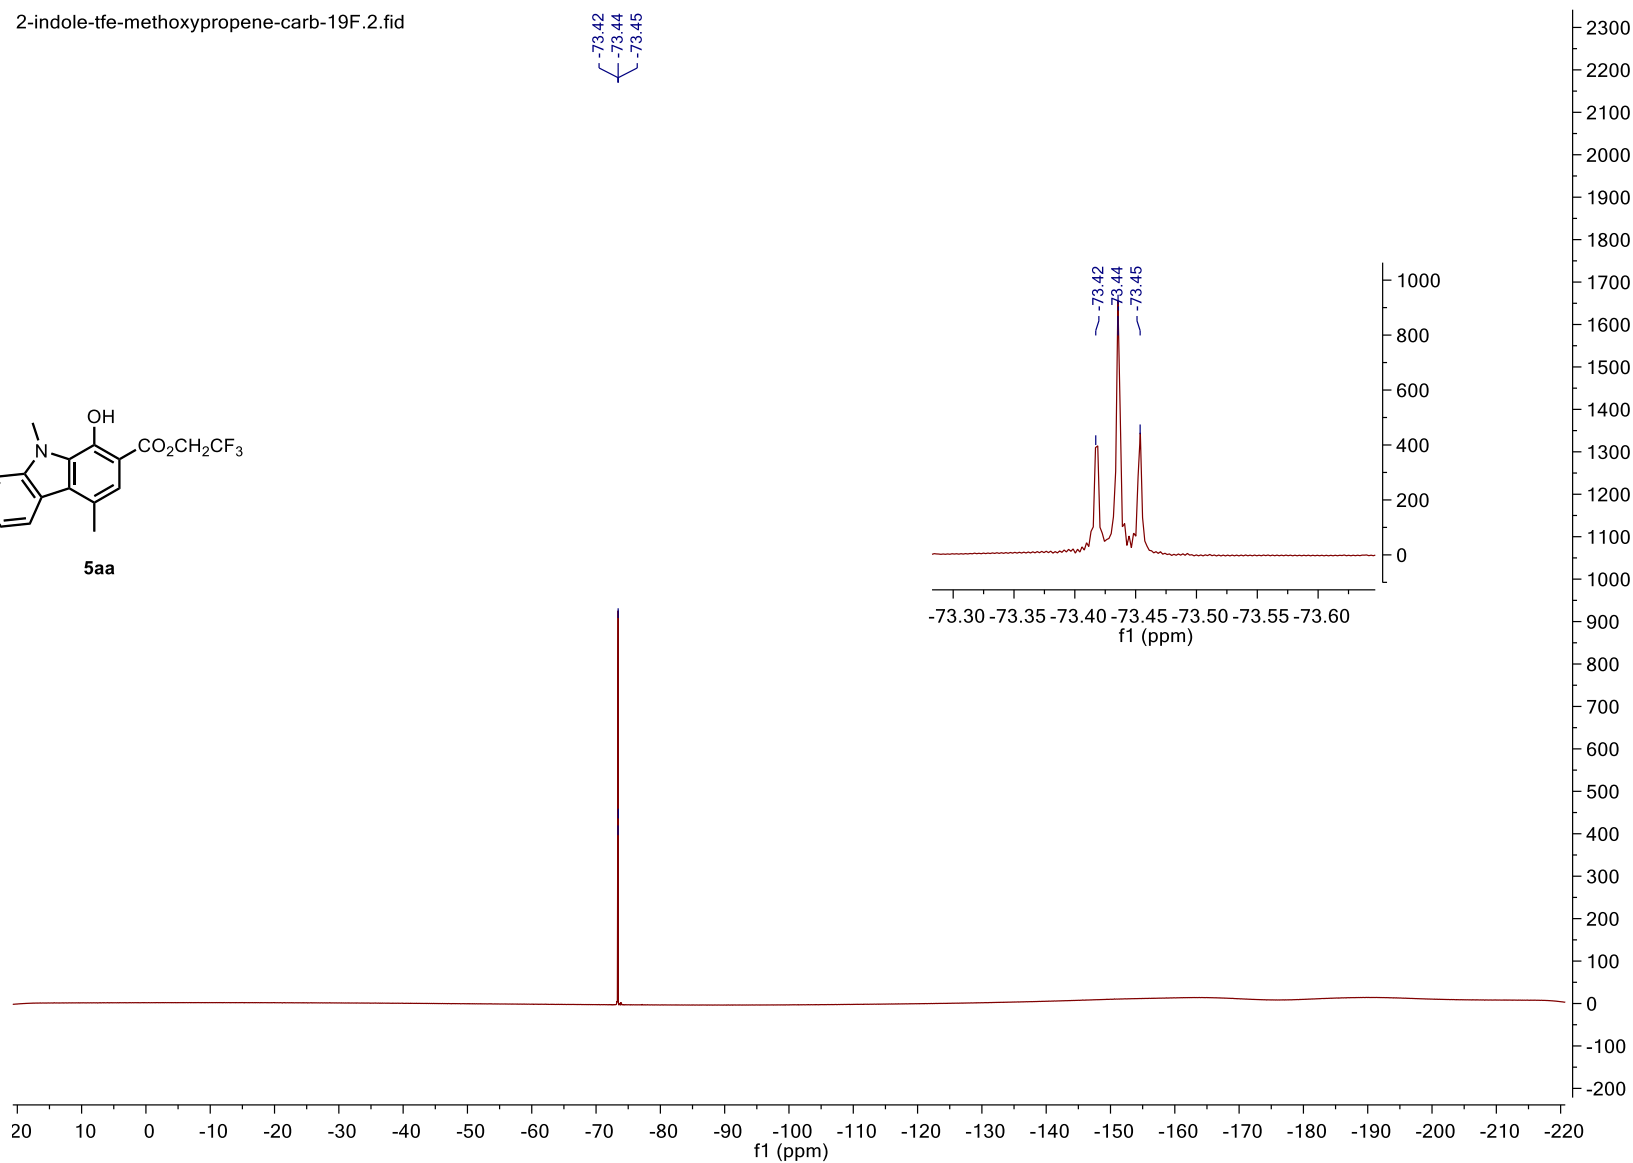

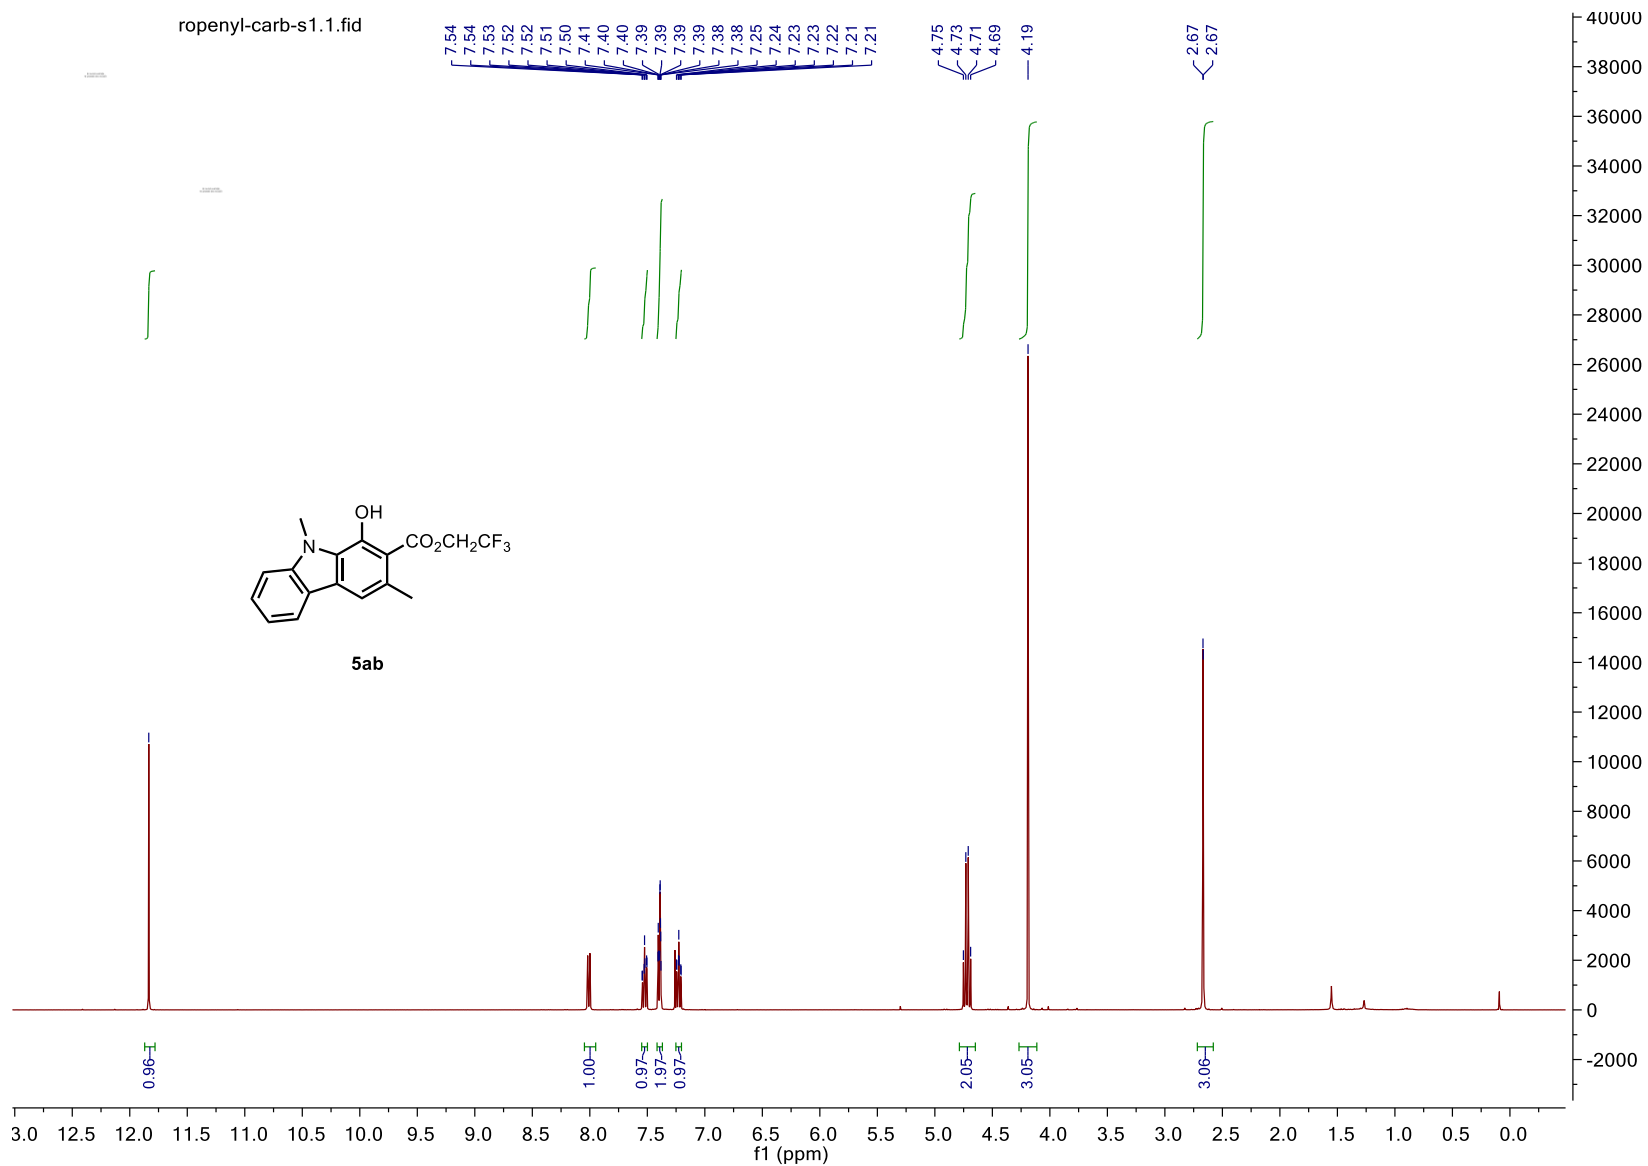

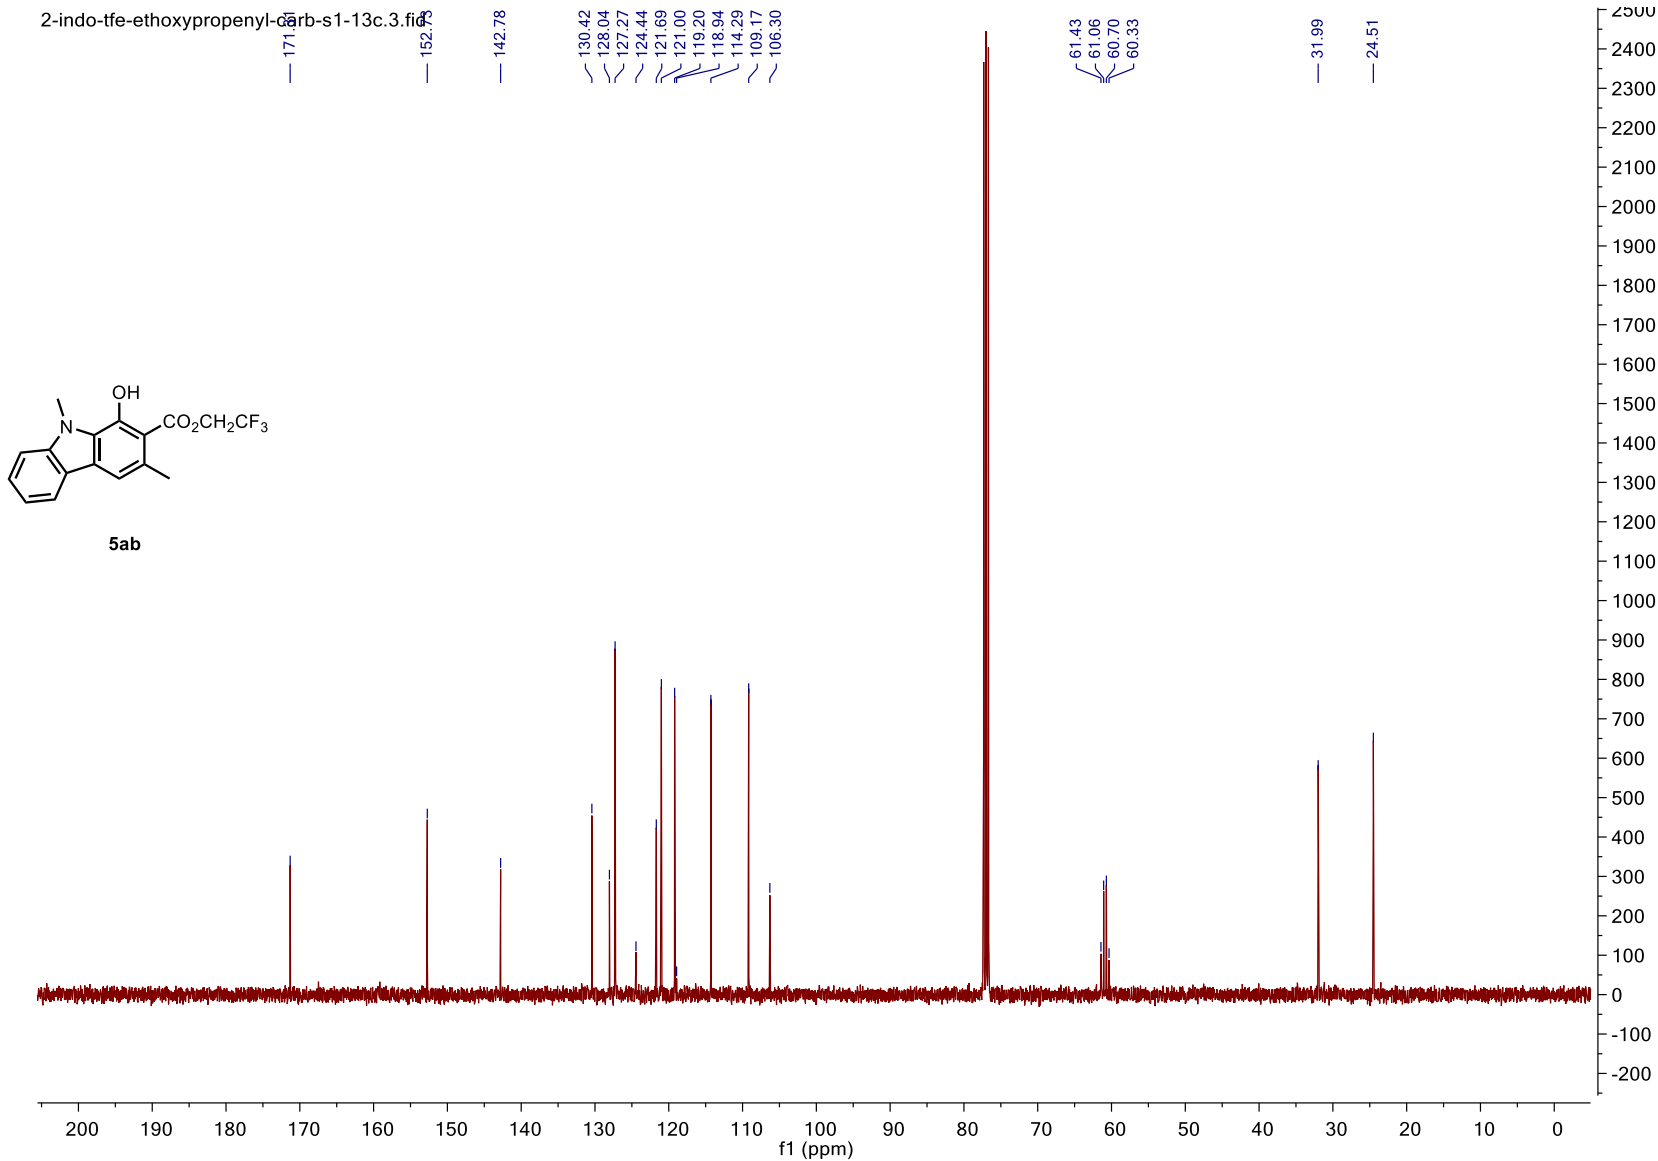

2-indole-tfe-etf3oxybutenyl-ybotf3-s1.1.fid

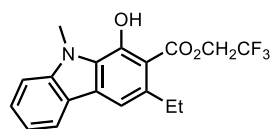

5ac

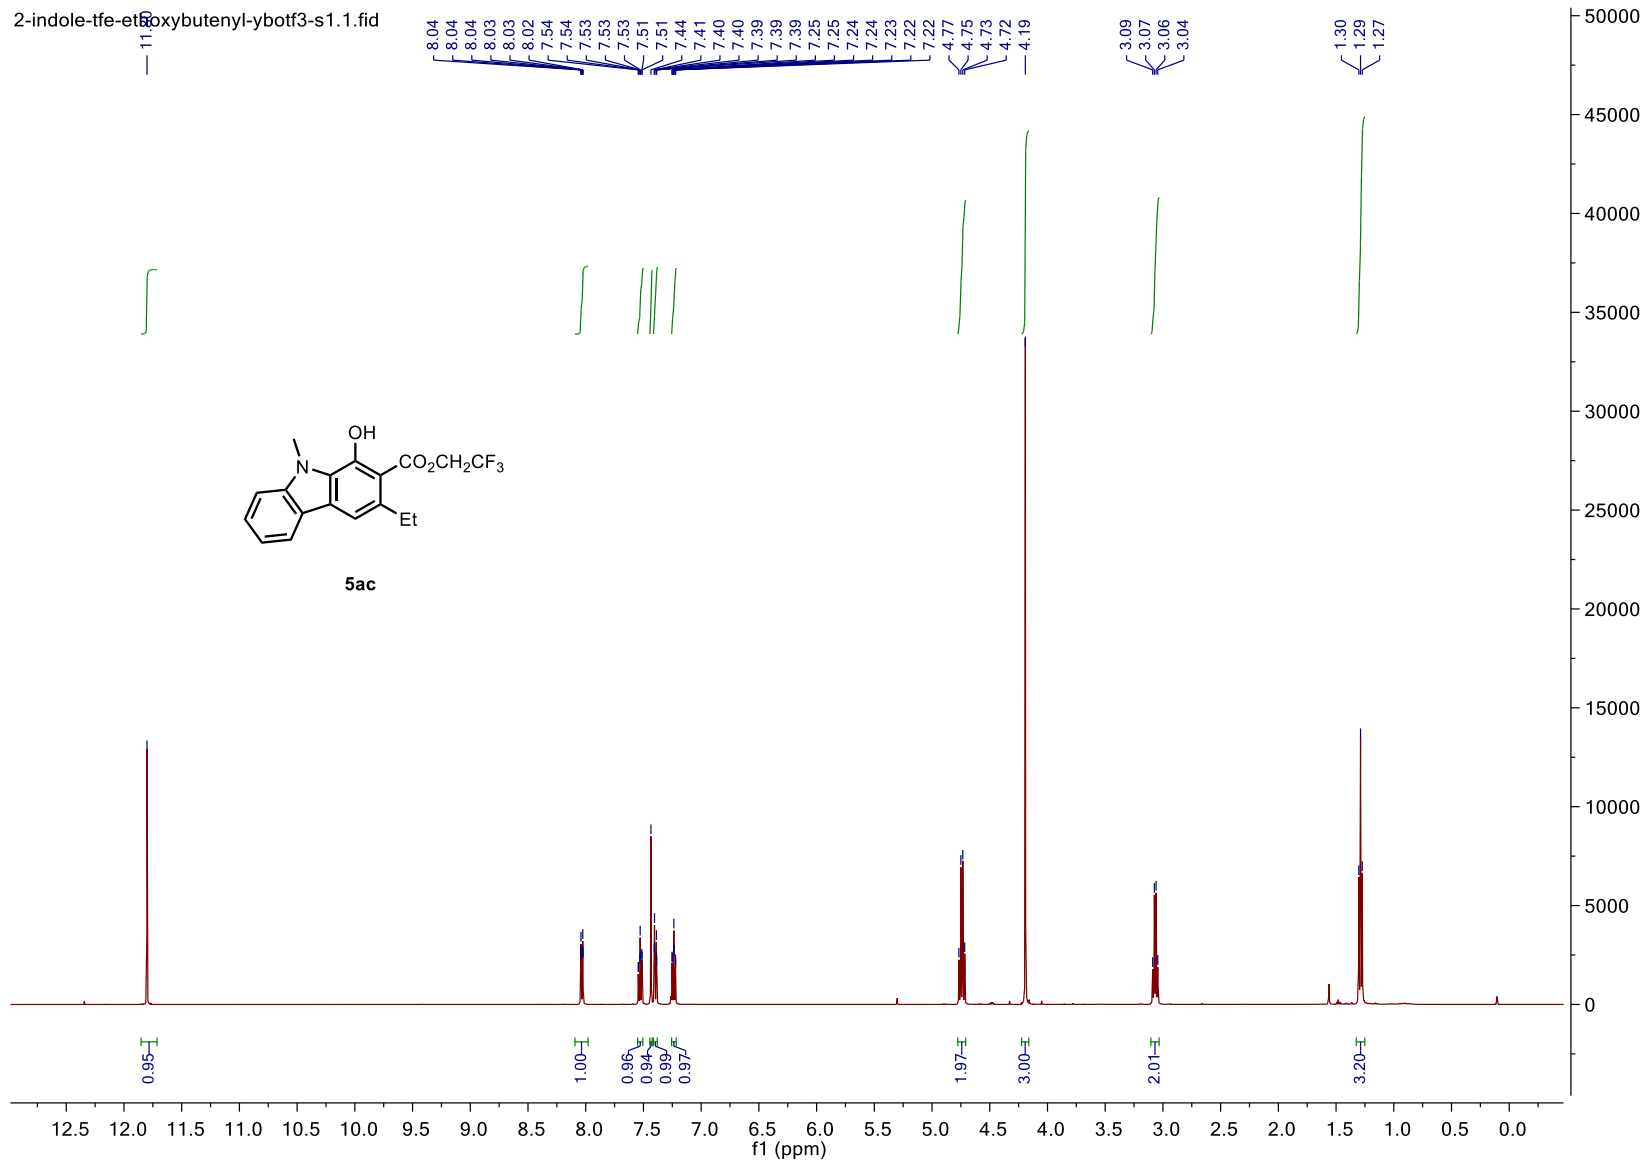

2-indole-tfe-ethoxybutene-carb-13c.1.fid

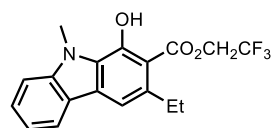

**5ac**

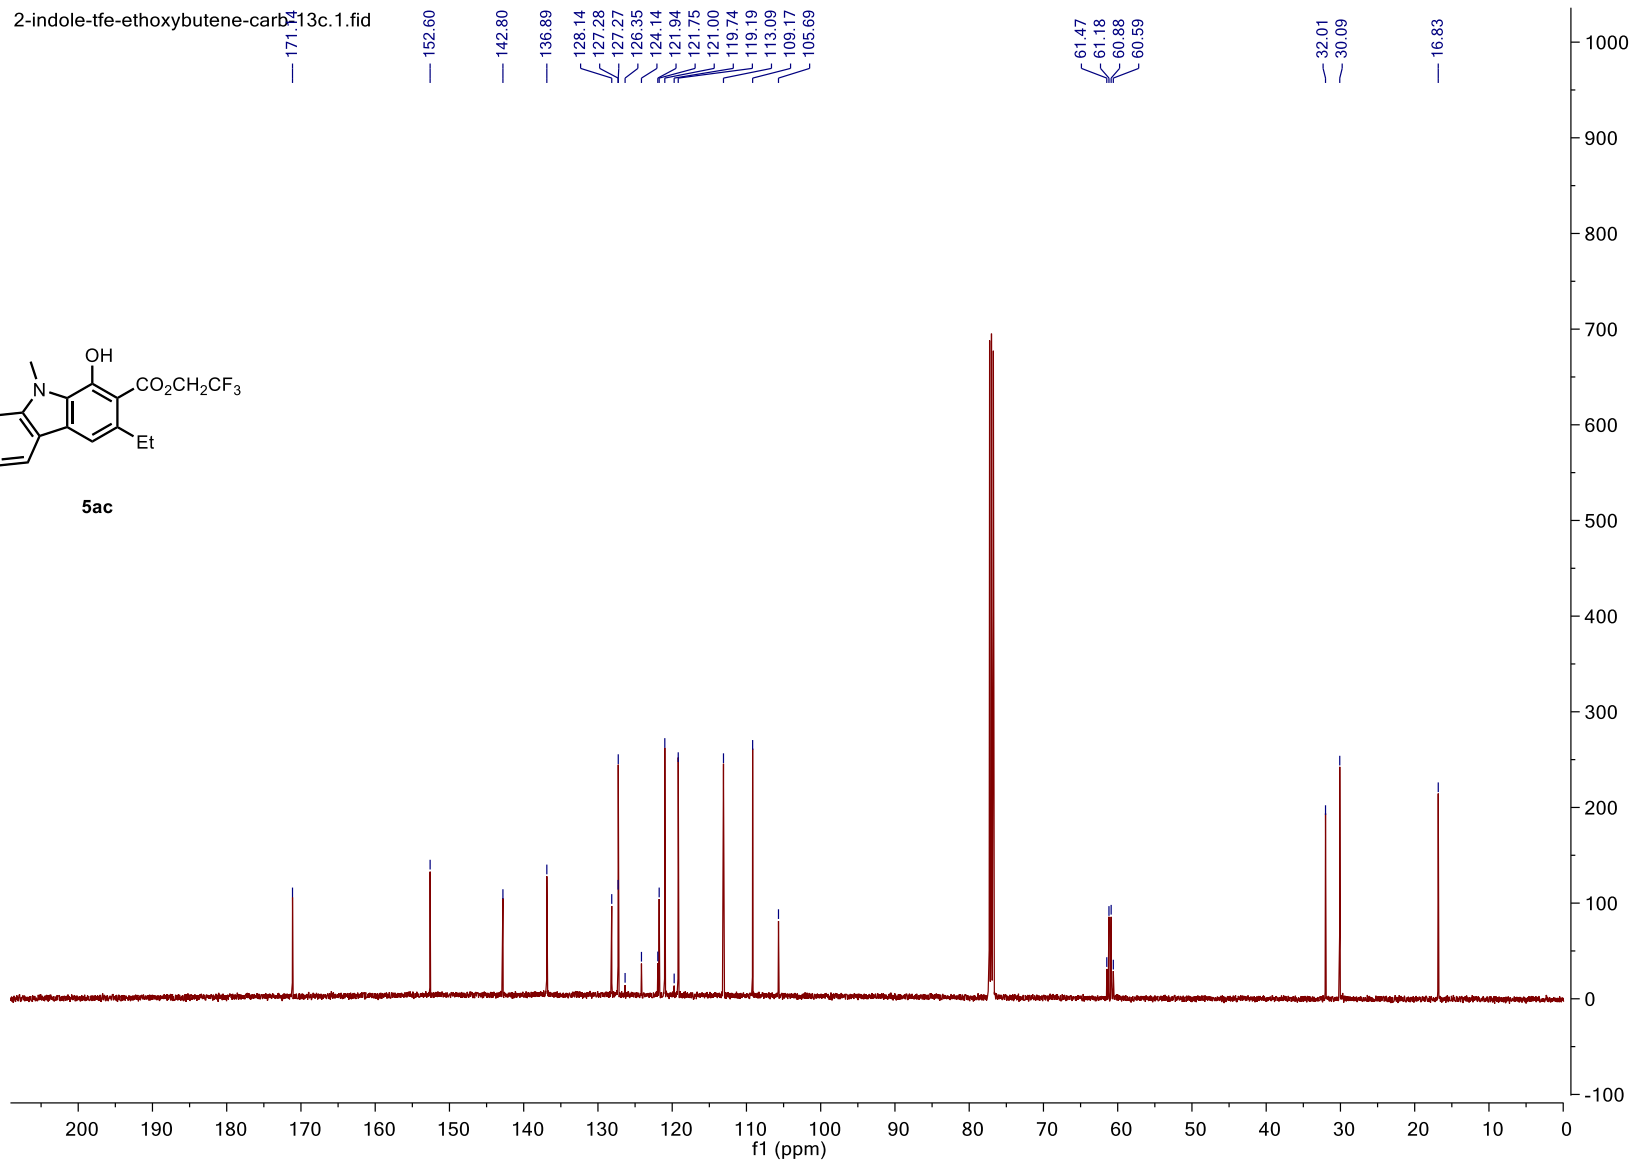

2-indole-tfe-c8methoxystyrene-DHF-Alotf3-water.1.fid

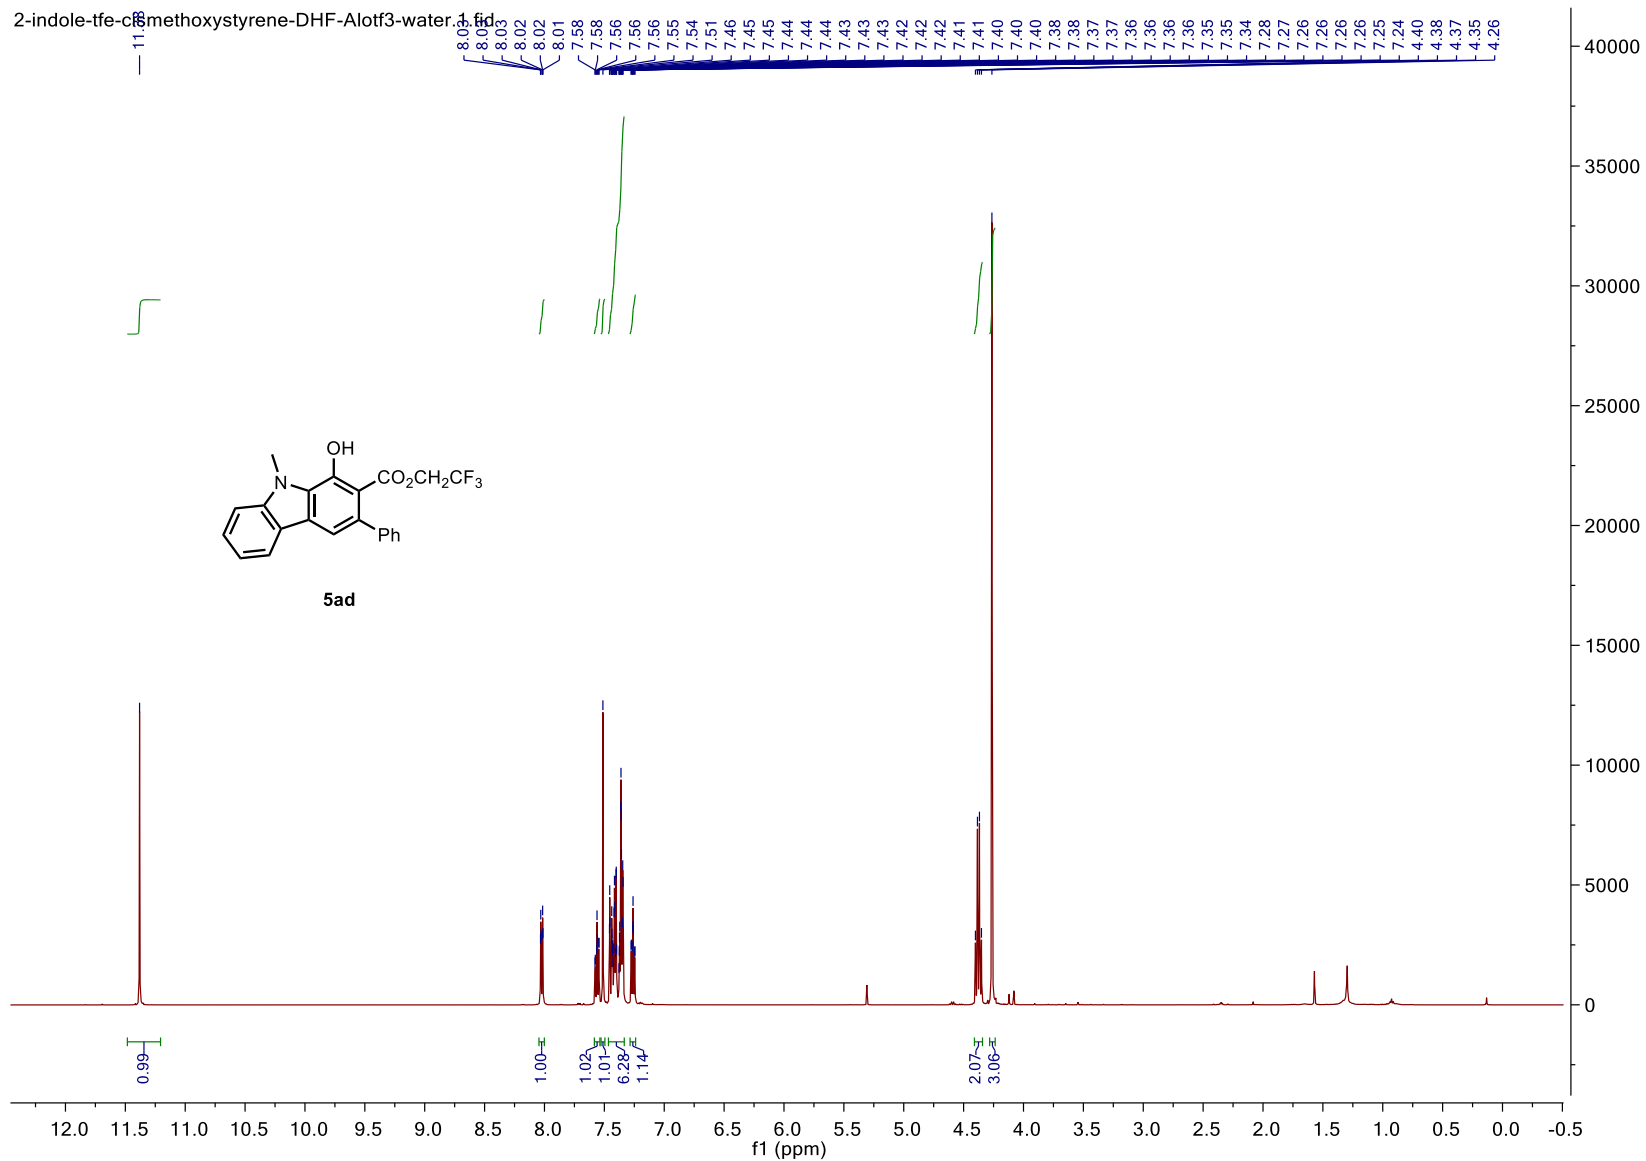

2-indole-tfe-methoxyphenyl-13c.1.fid

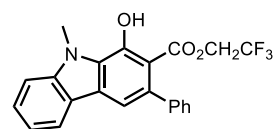

**5ad**

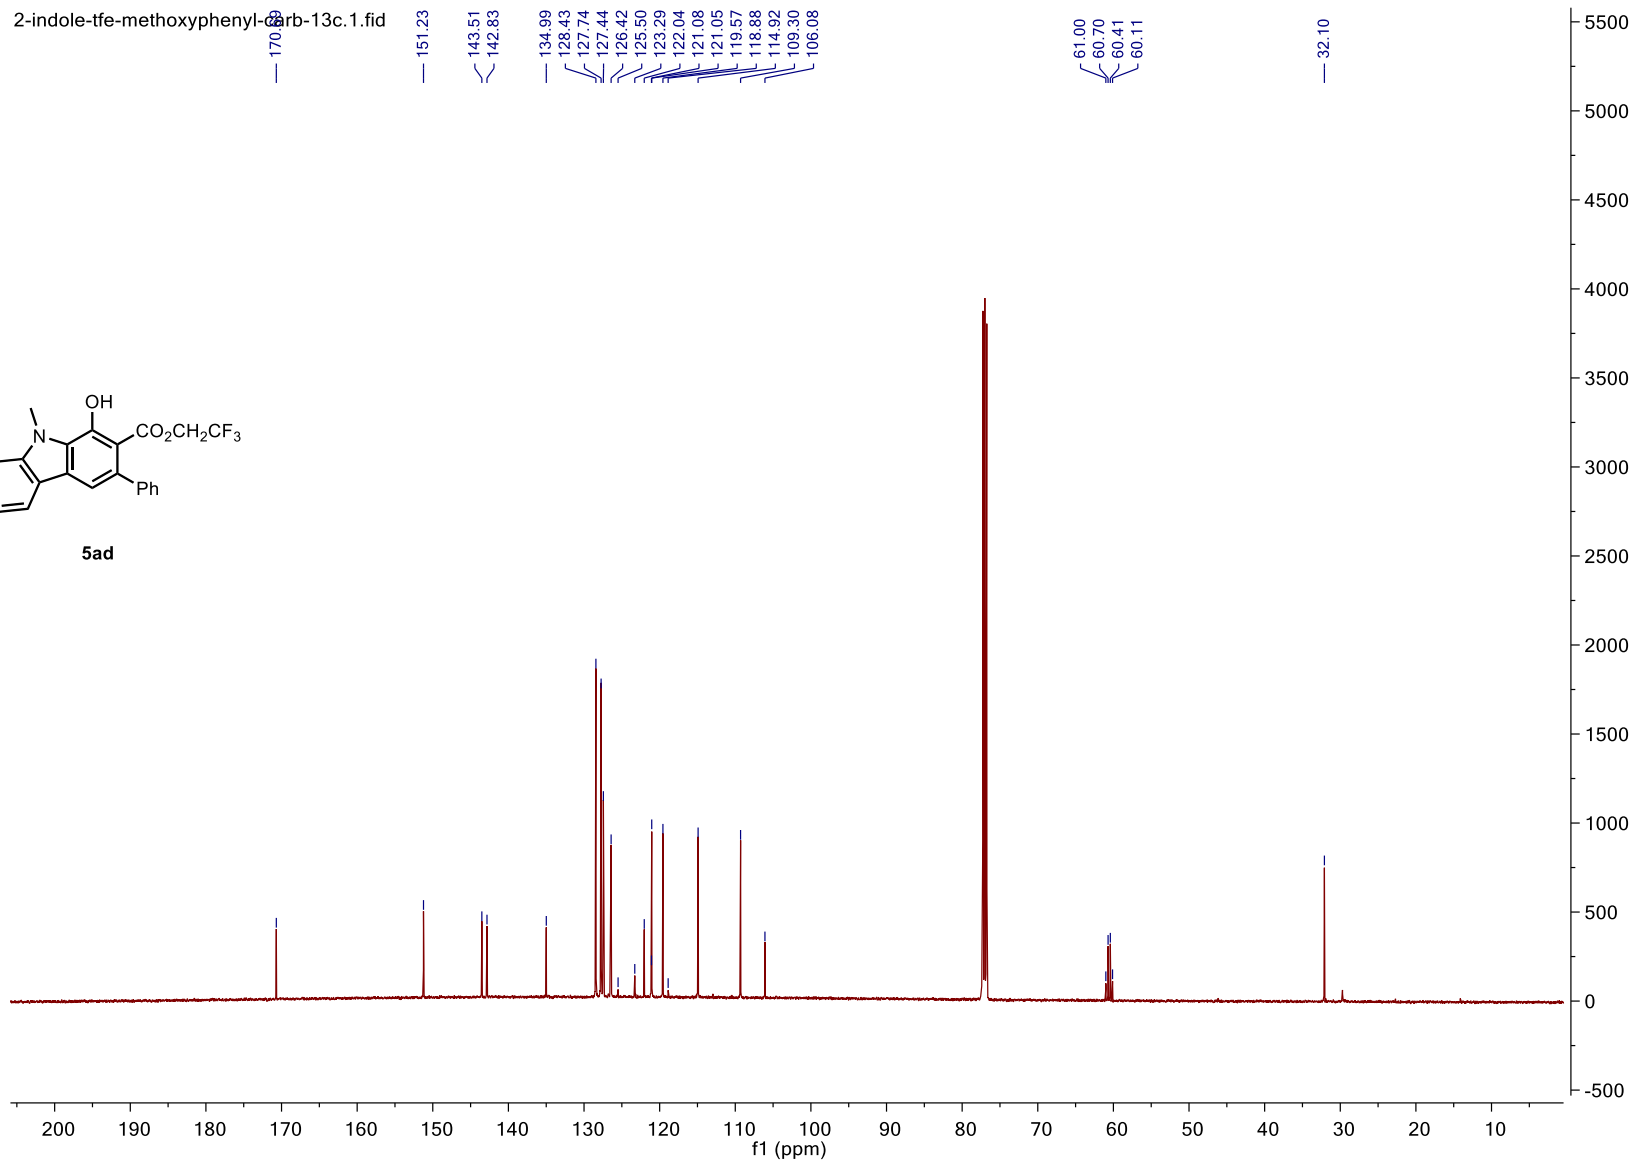

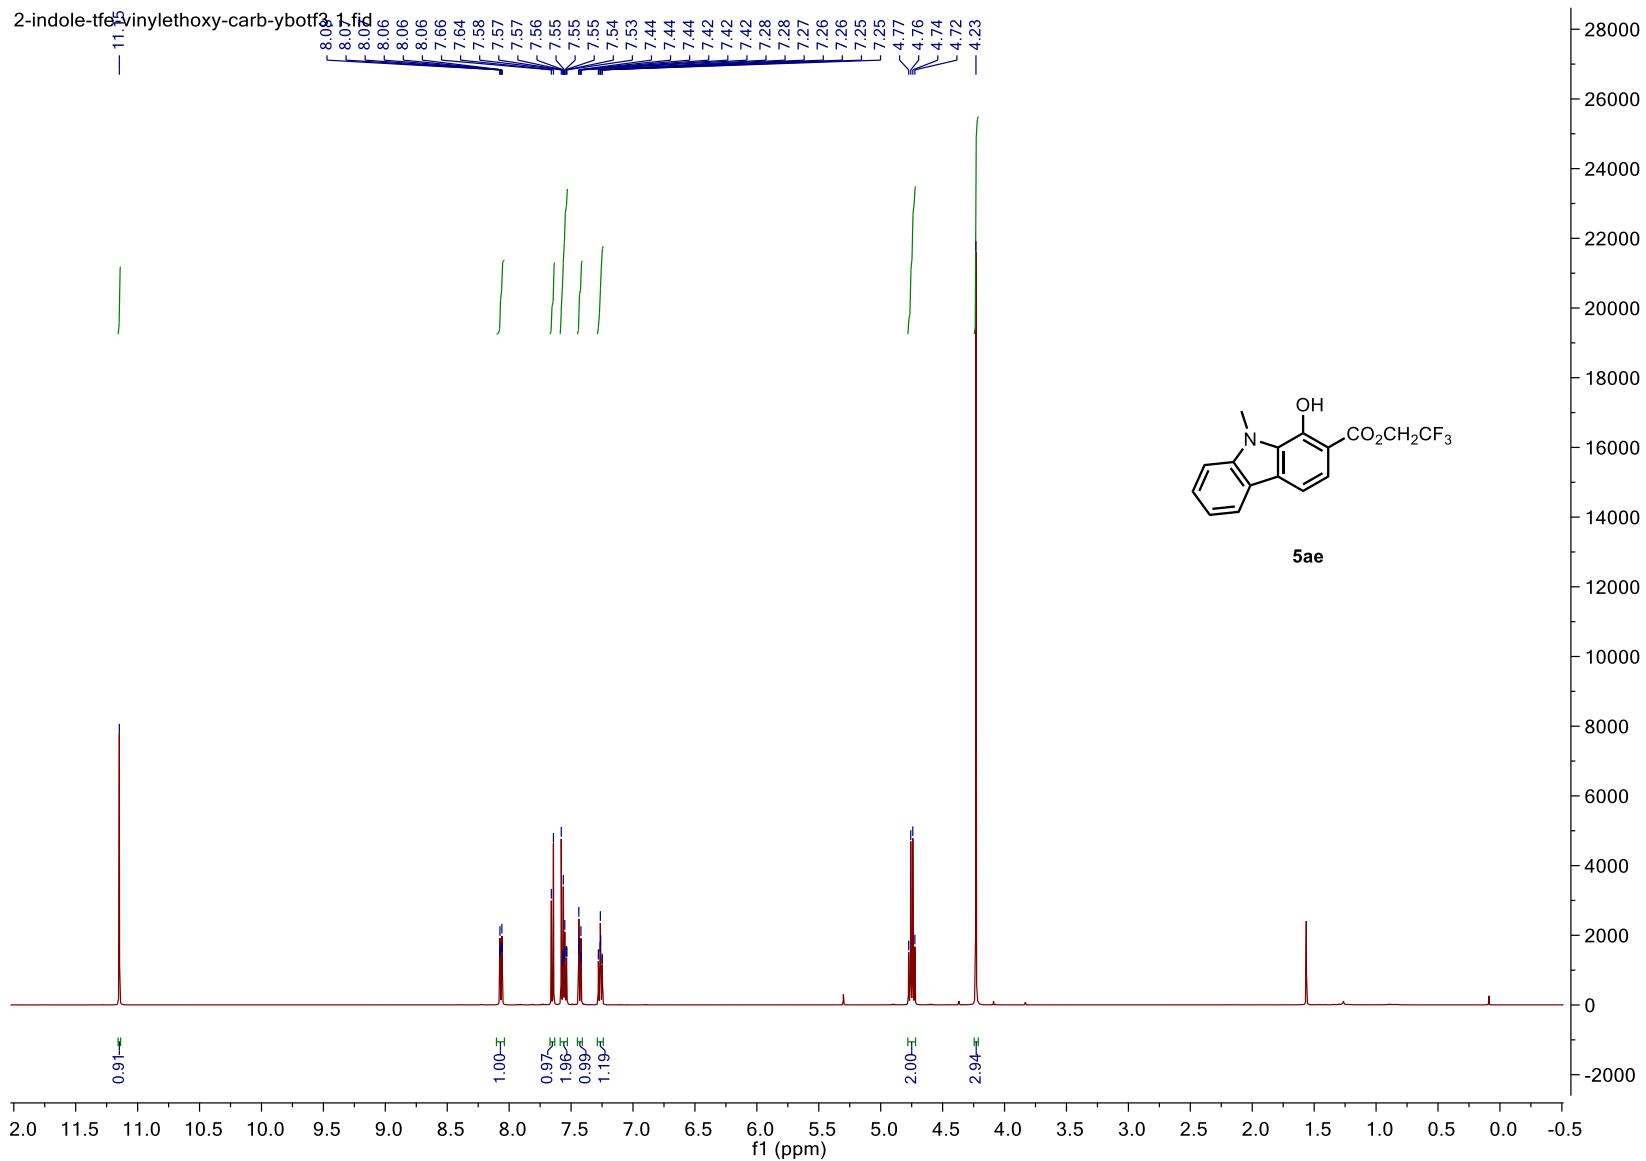



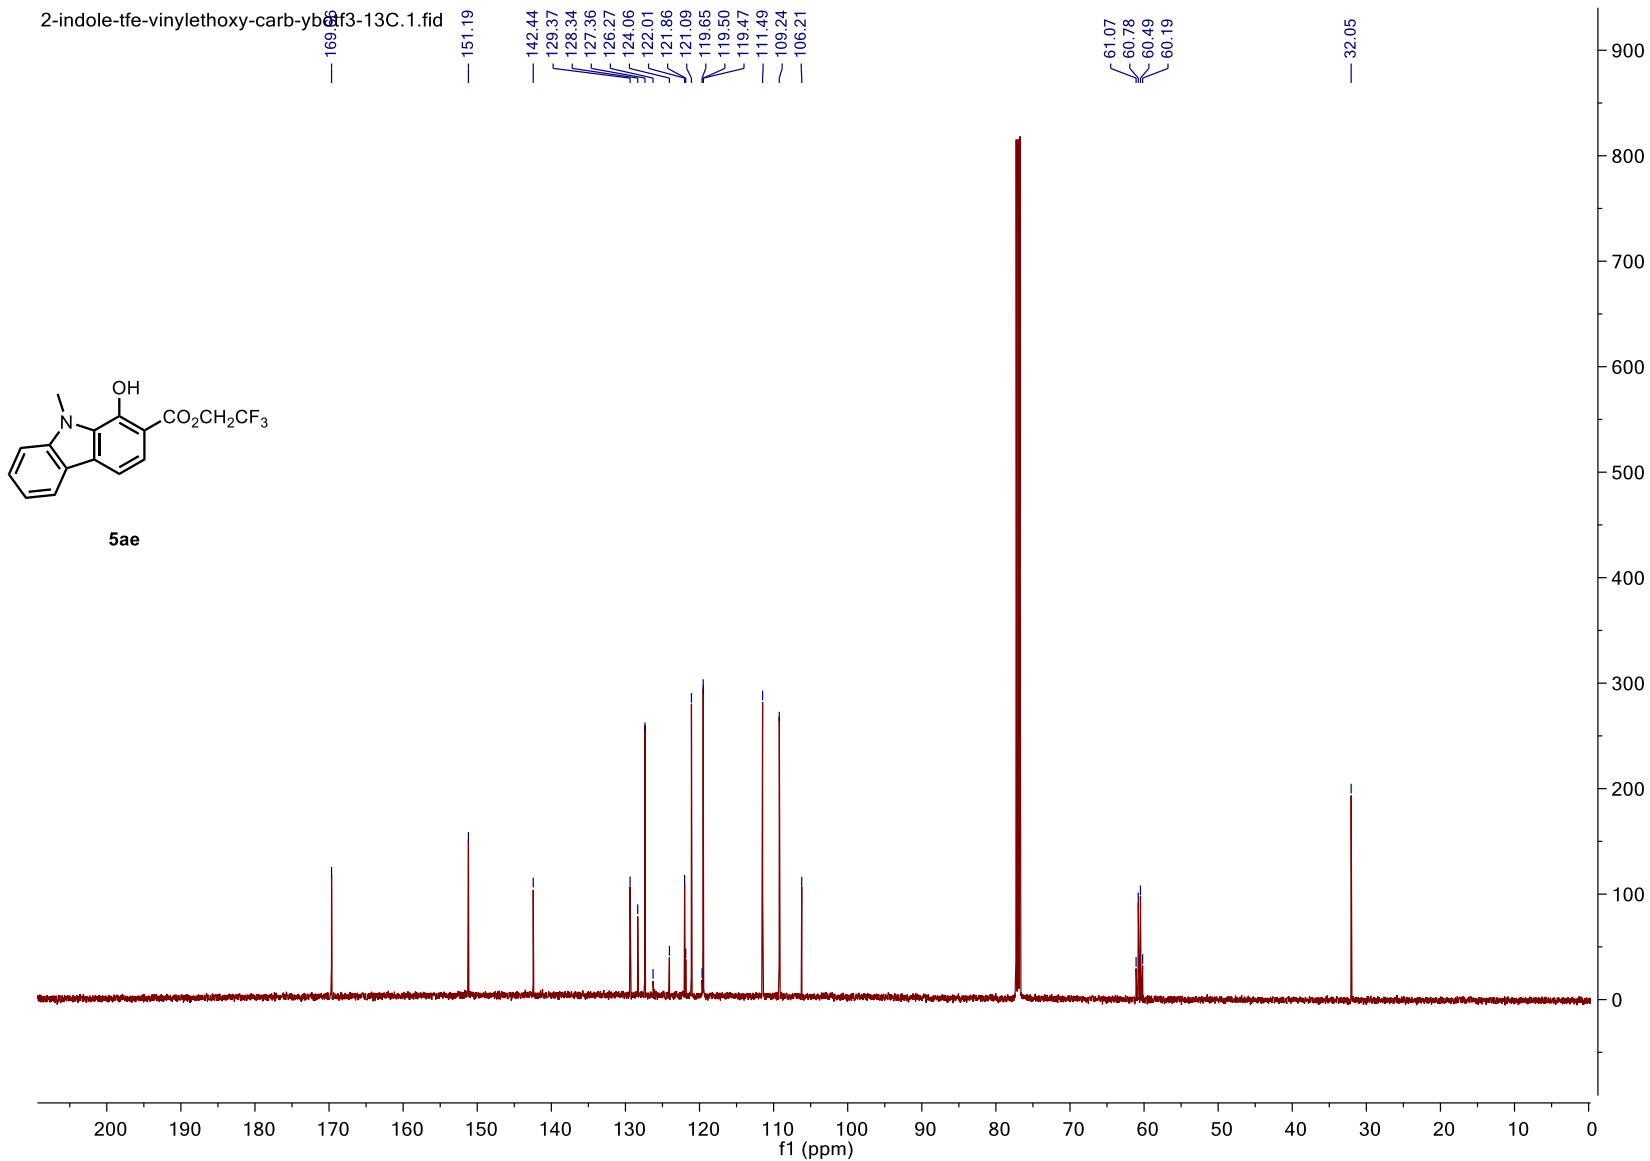

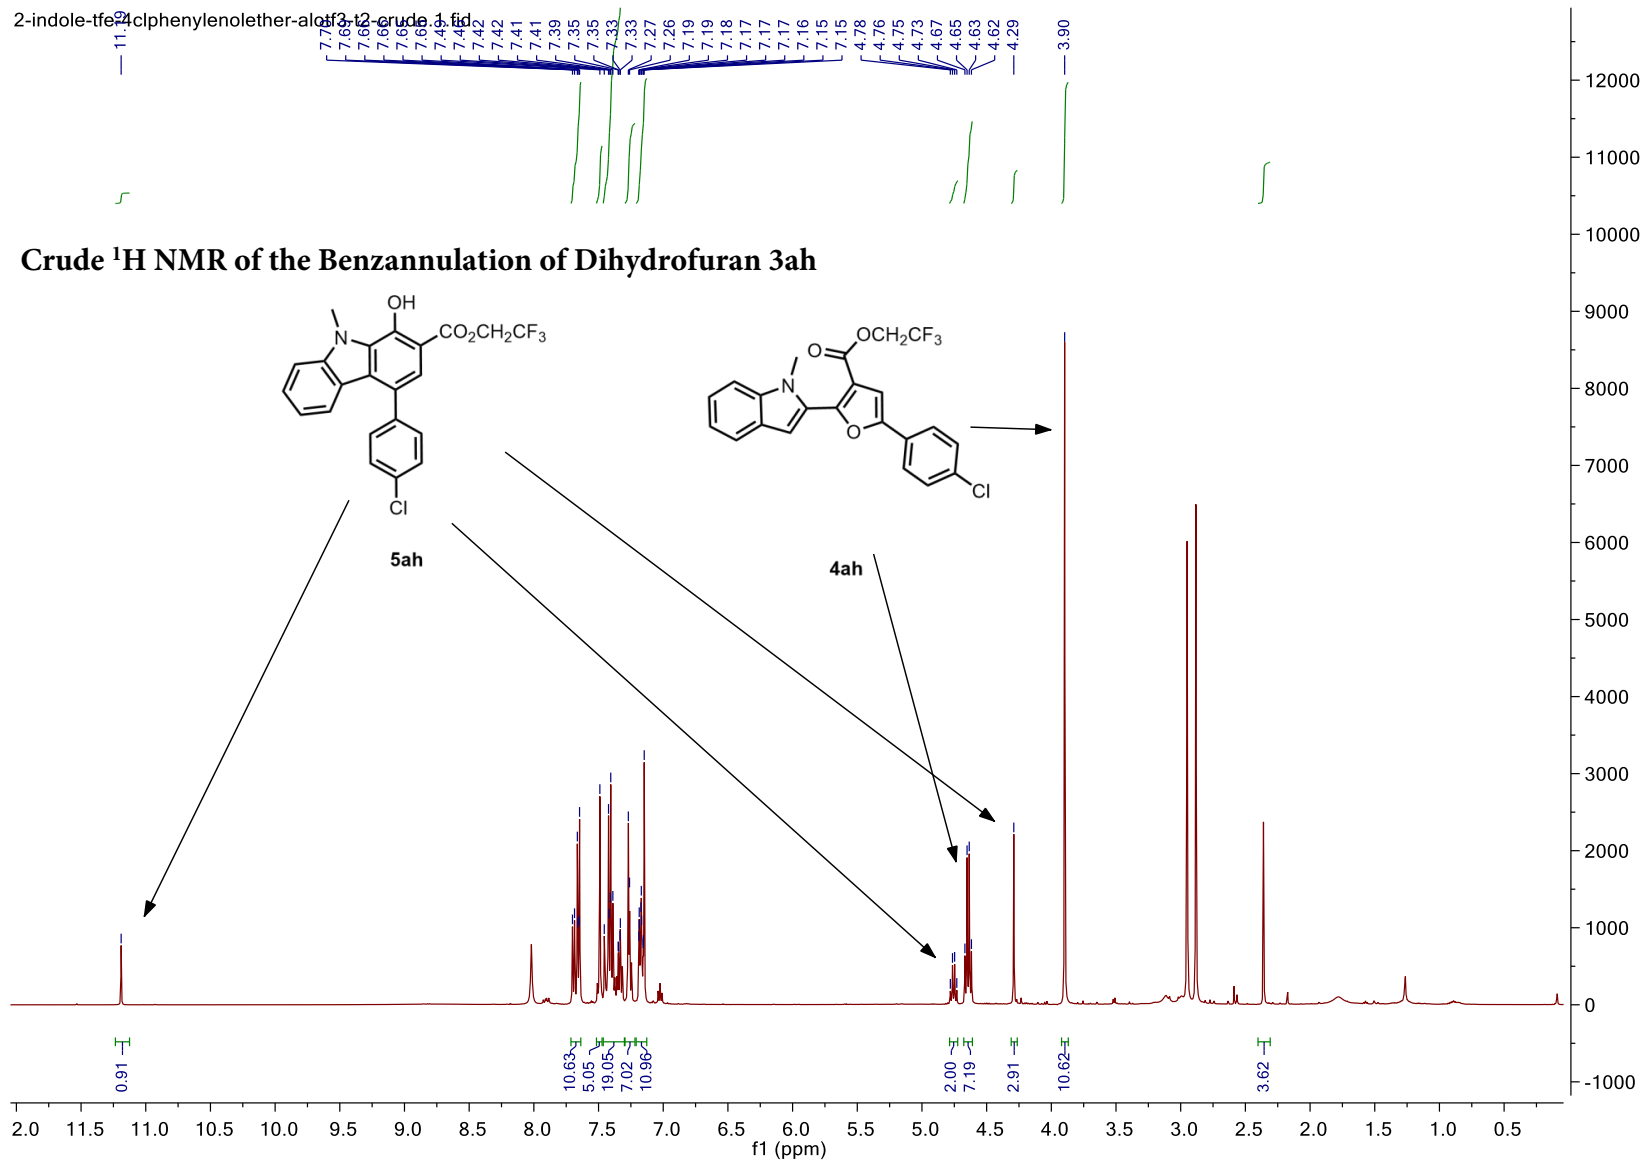

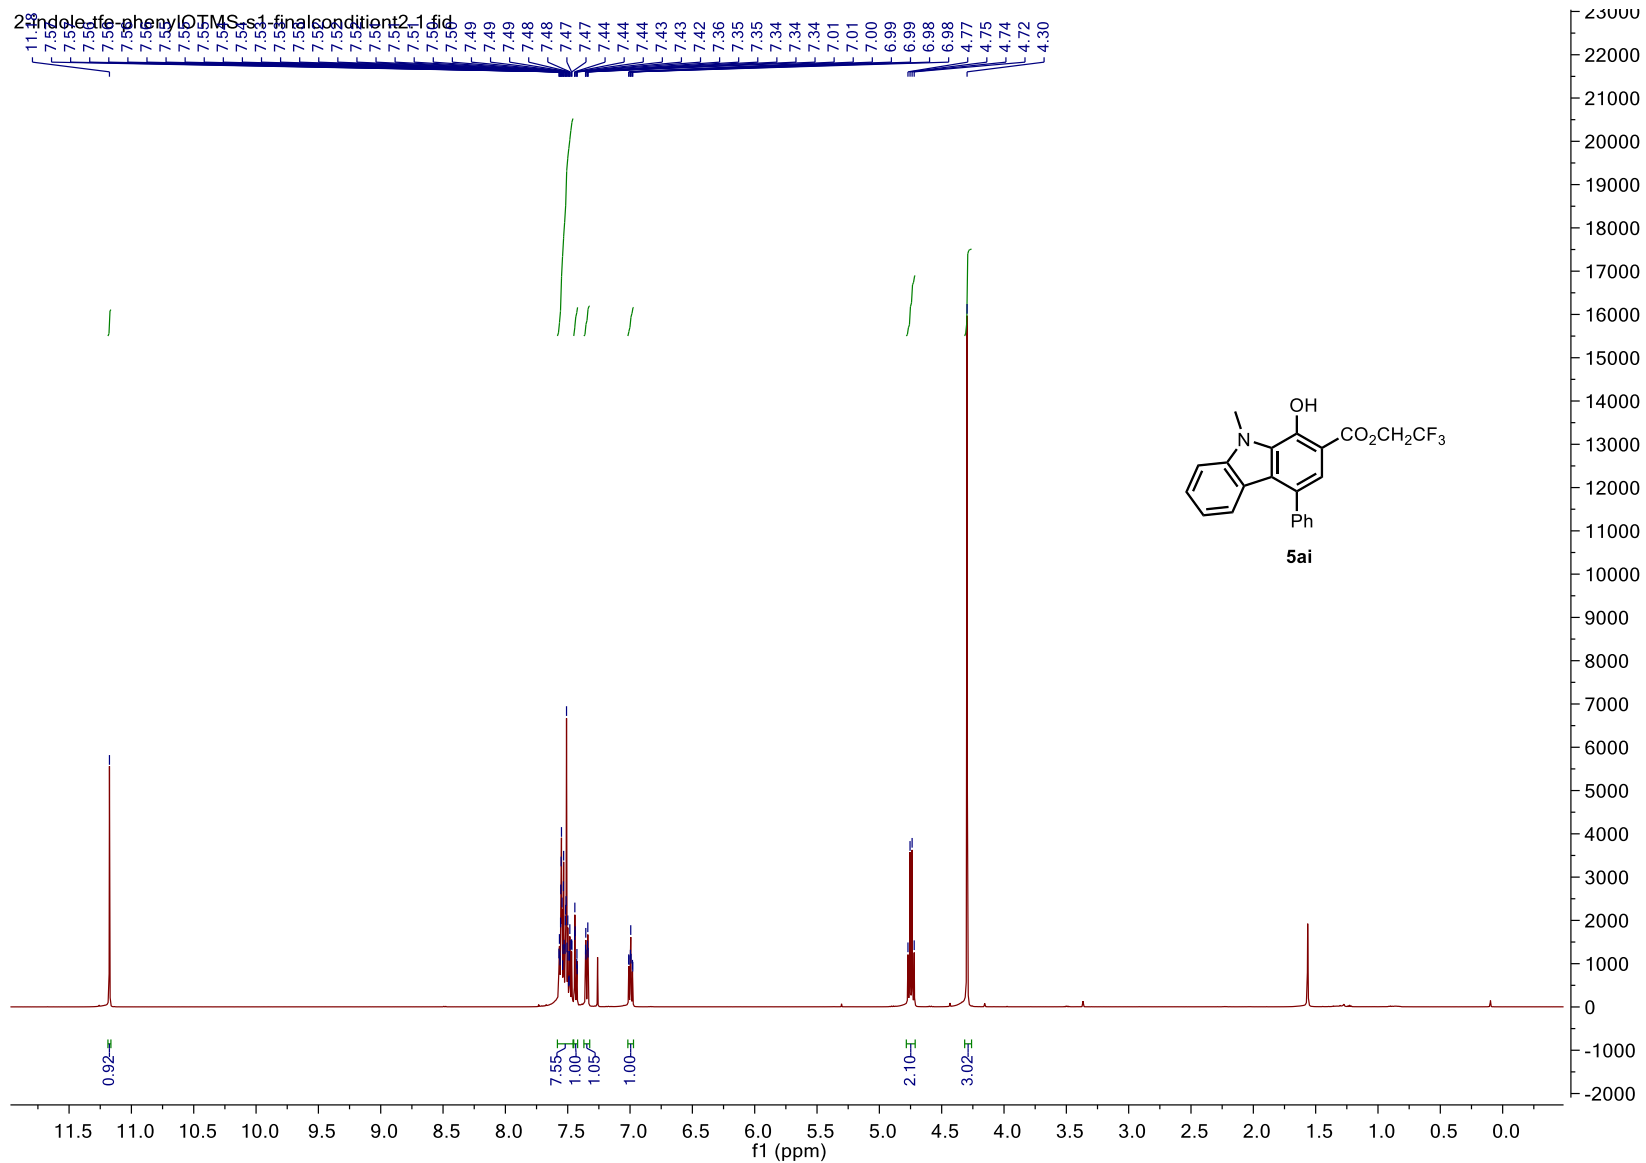

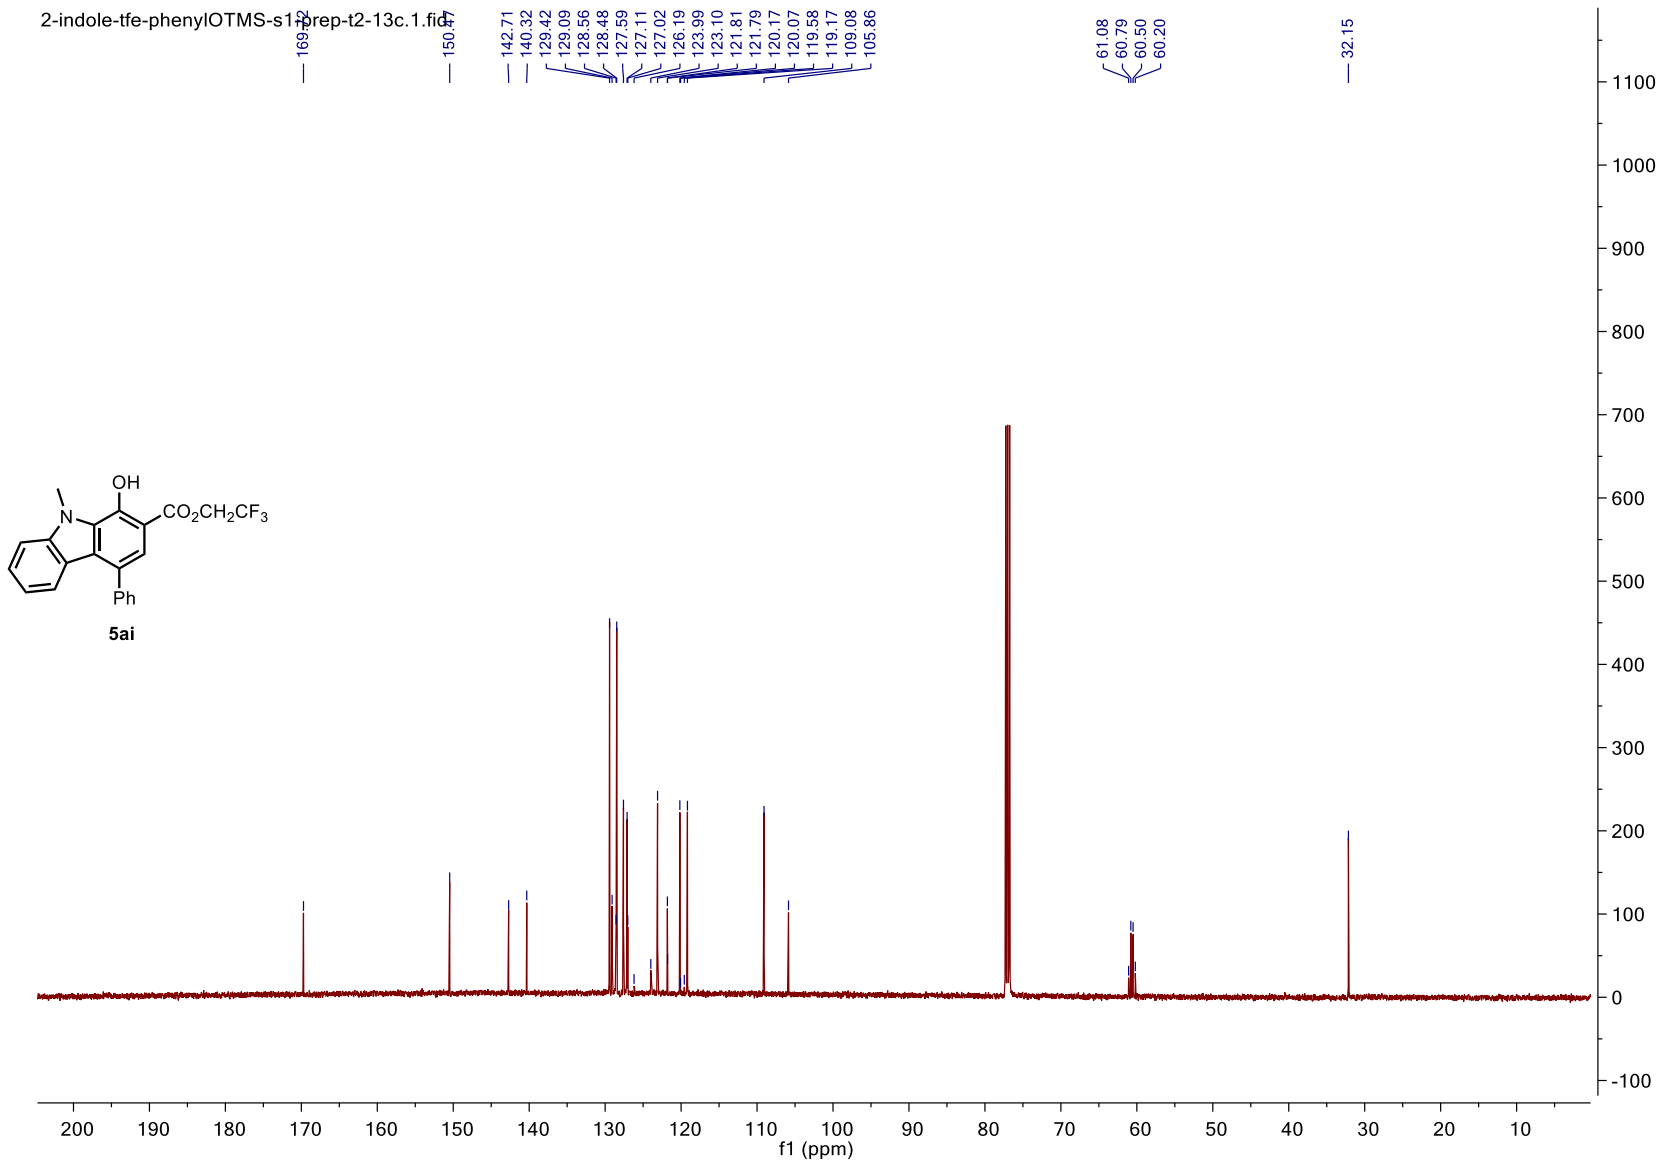

2-indole-furan-carb-alotf3.1.fid

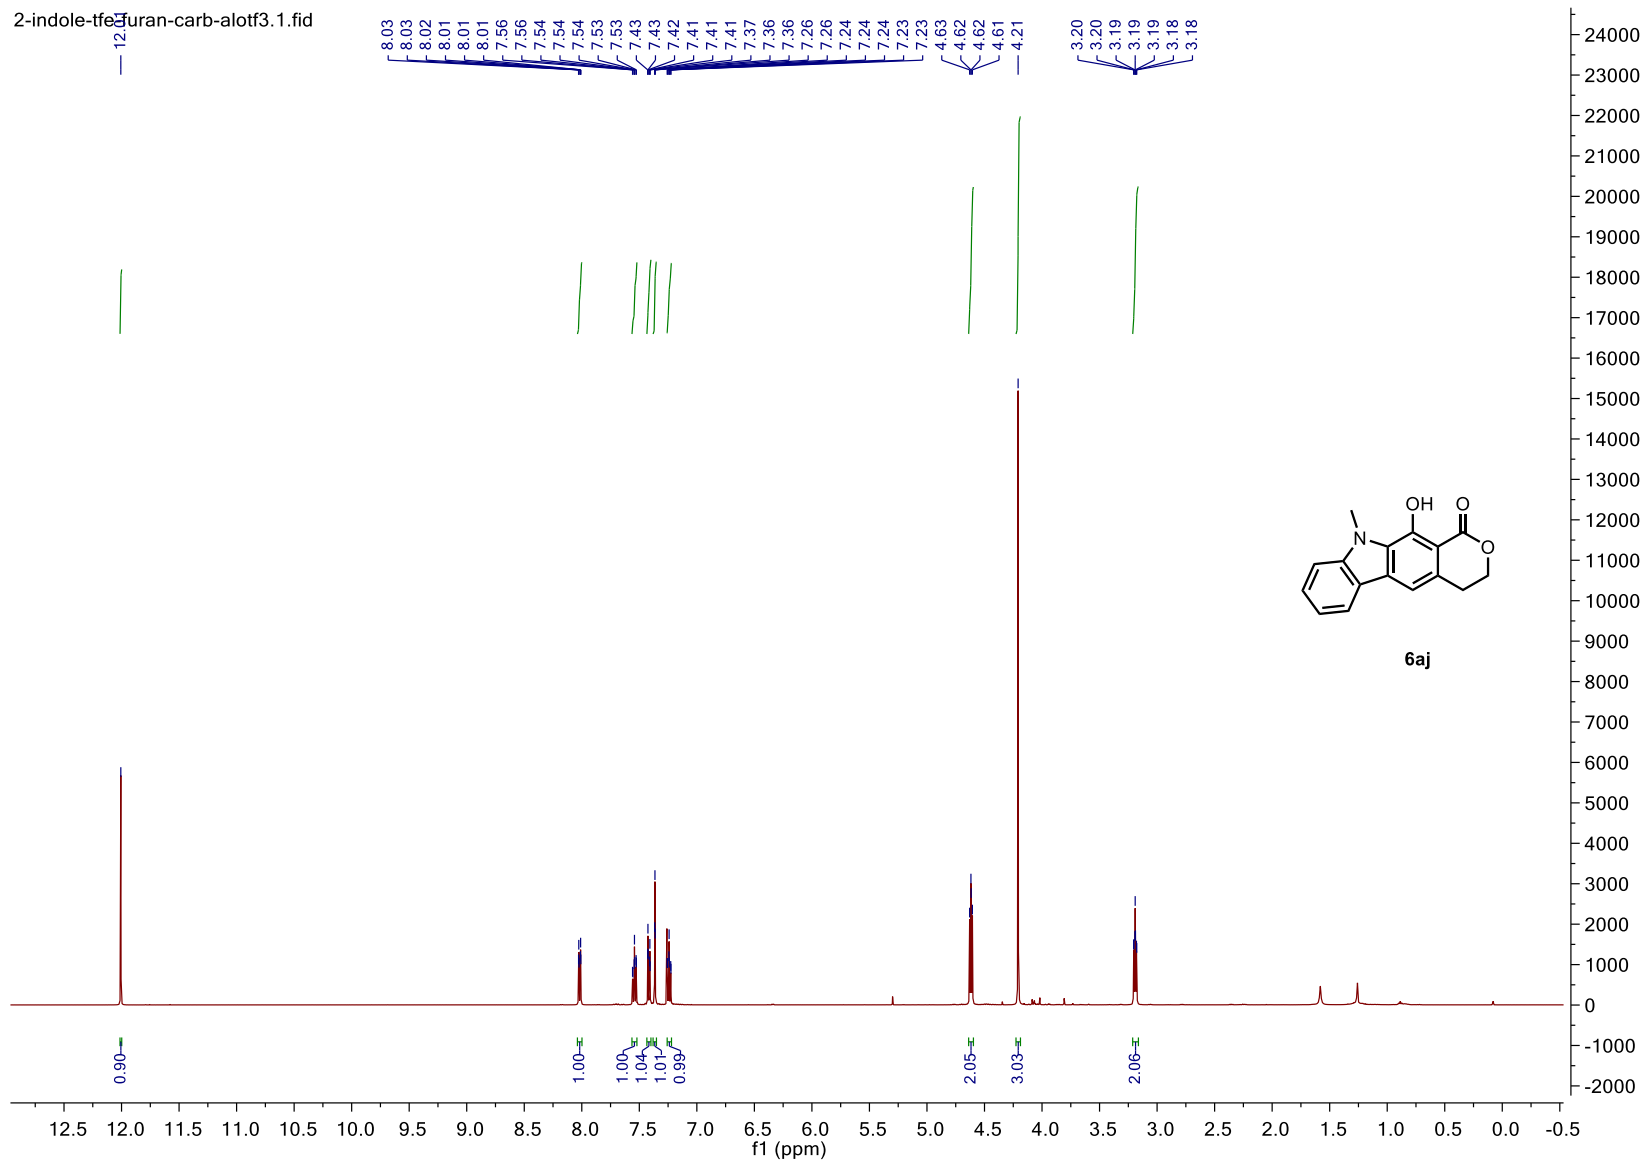

2-indole-tfe-furan-carb-alos-13C.1.fid

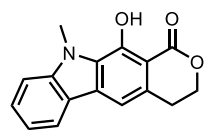

6aj

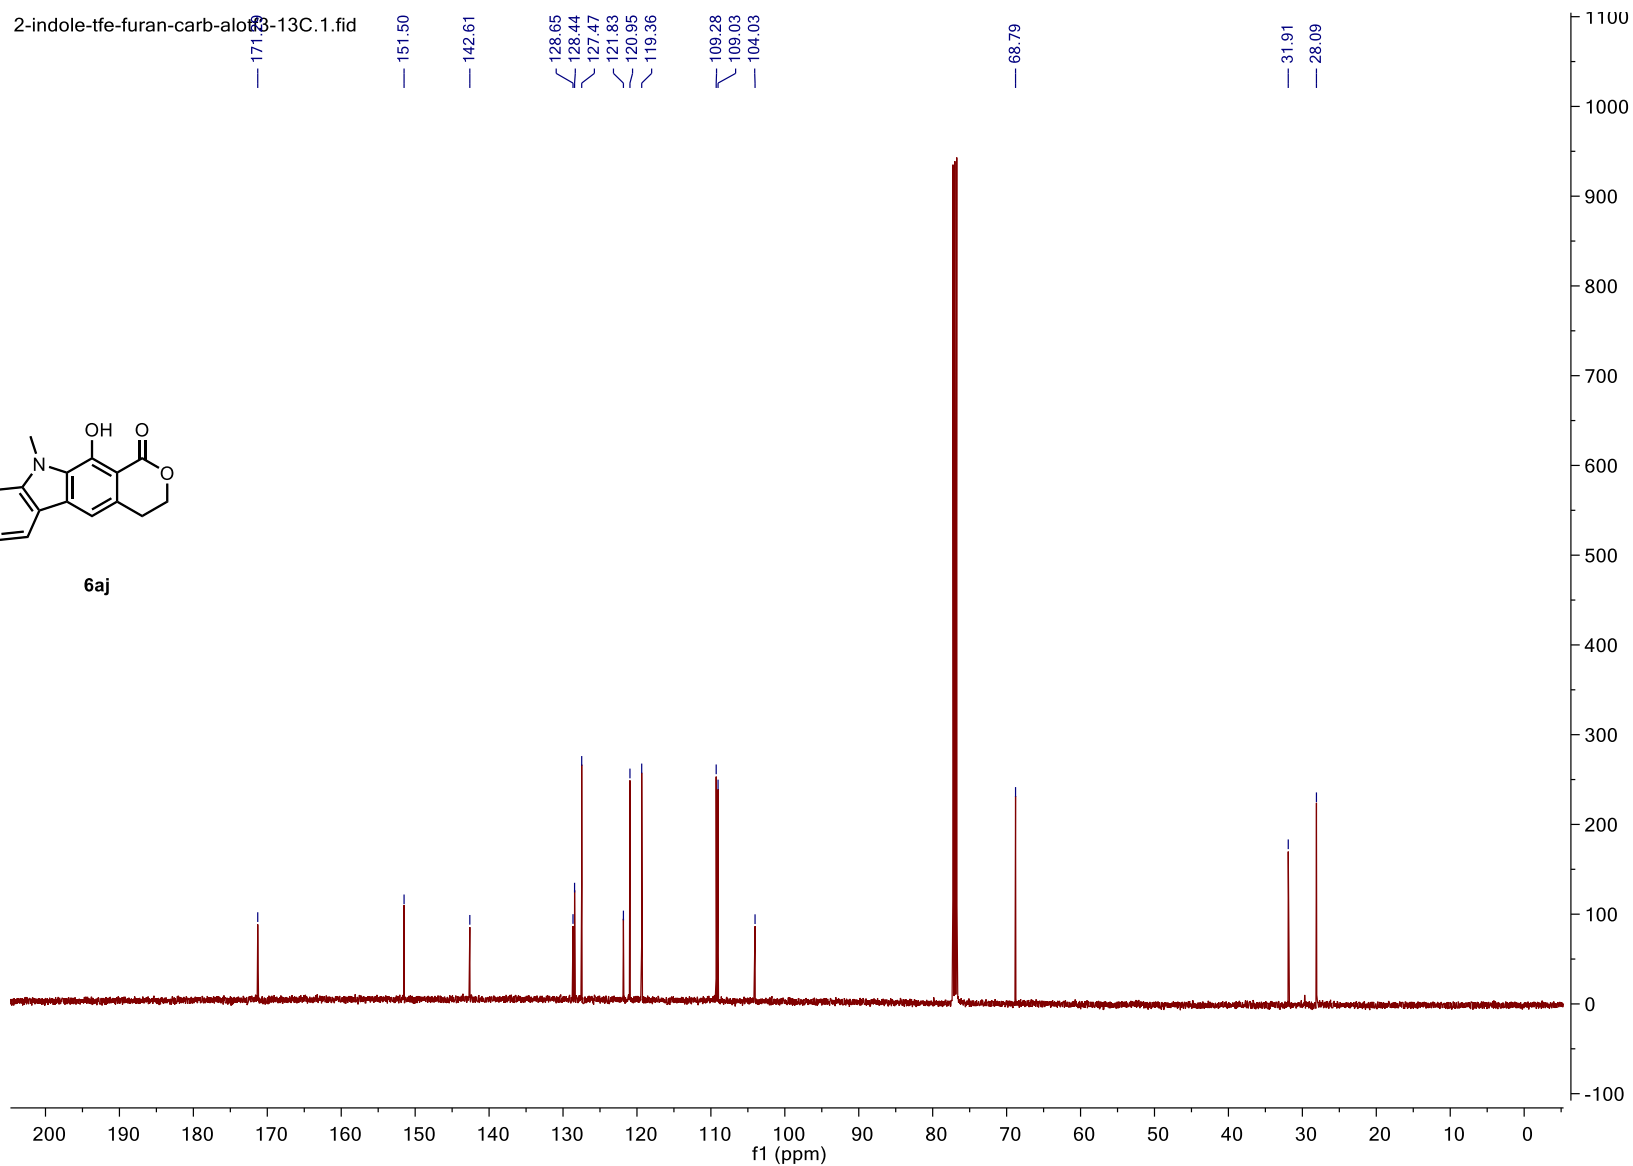

2-indole-tfe-pyran-carb-alotf3-s3.1.fid

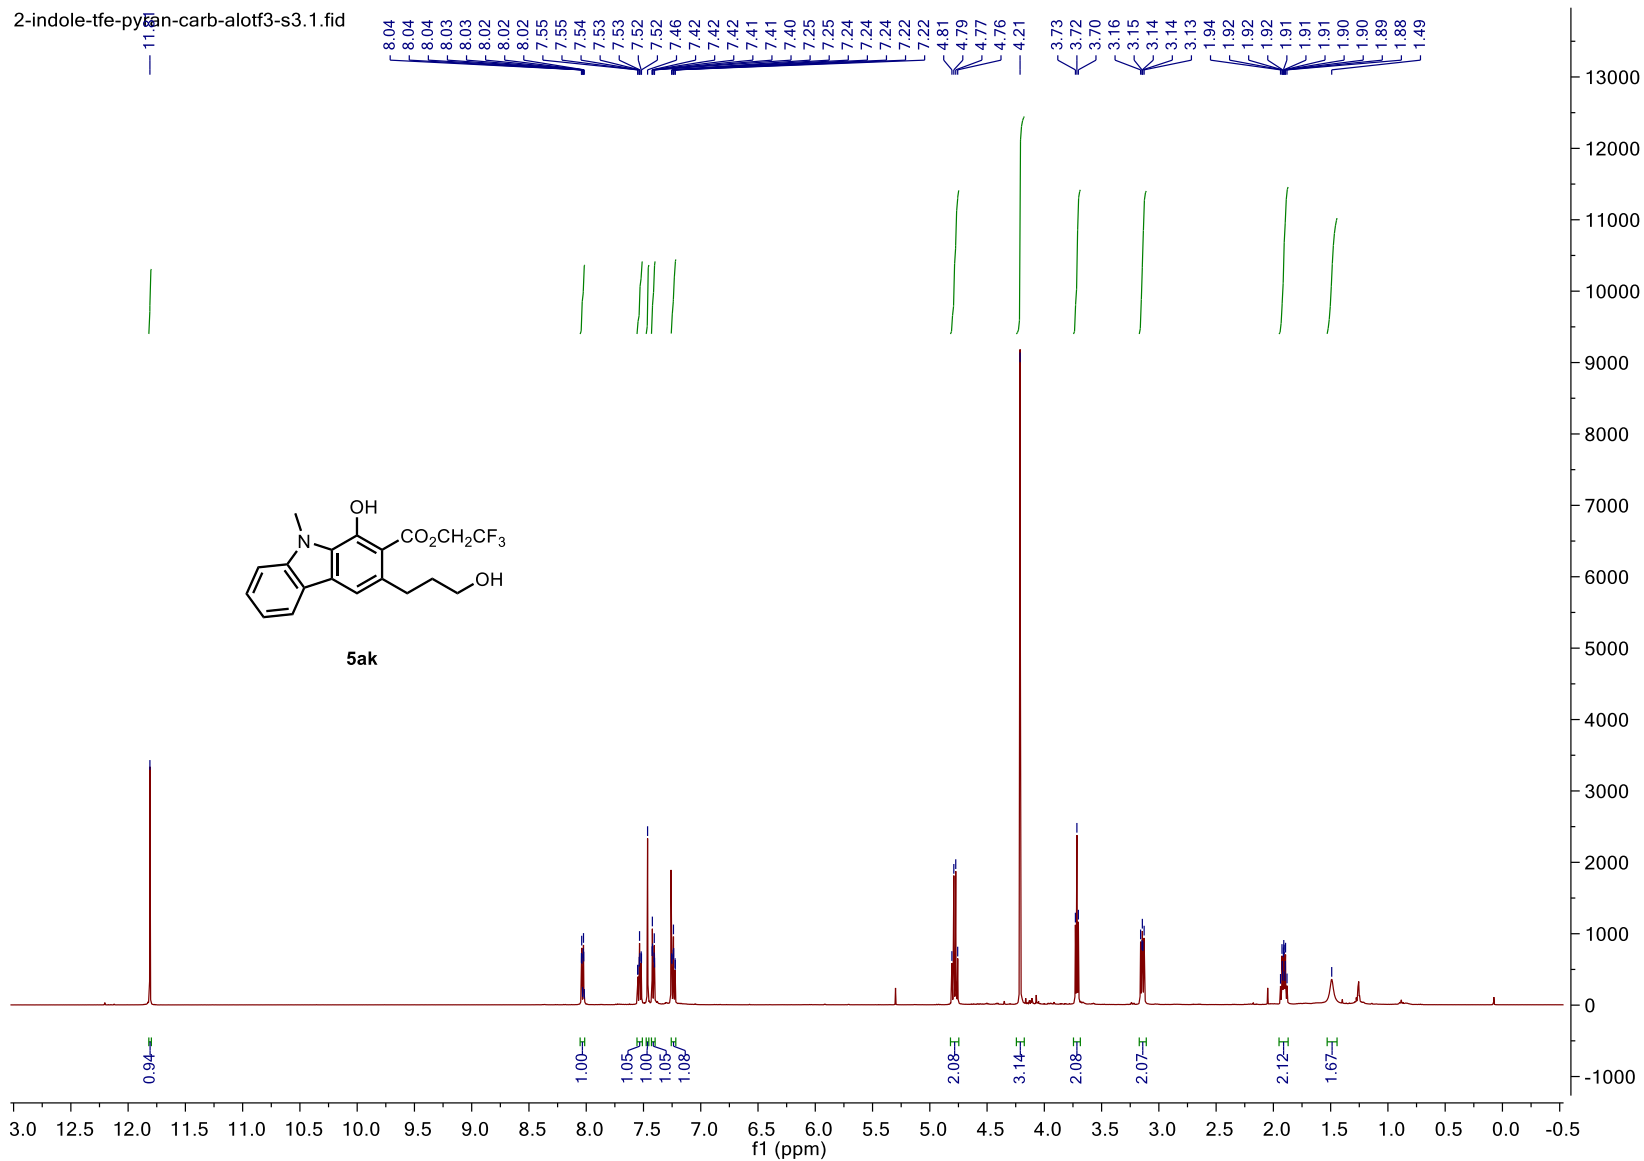

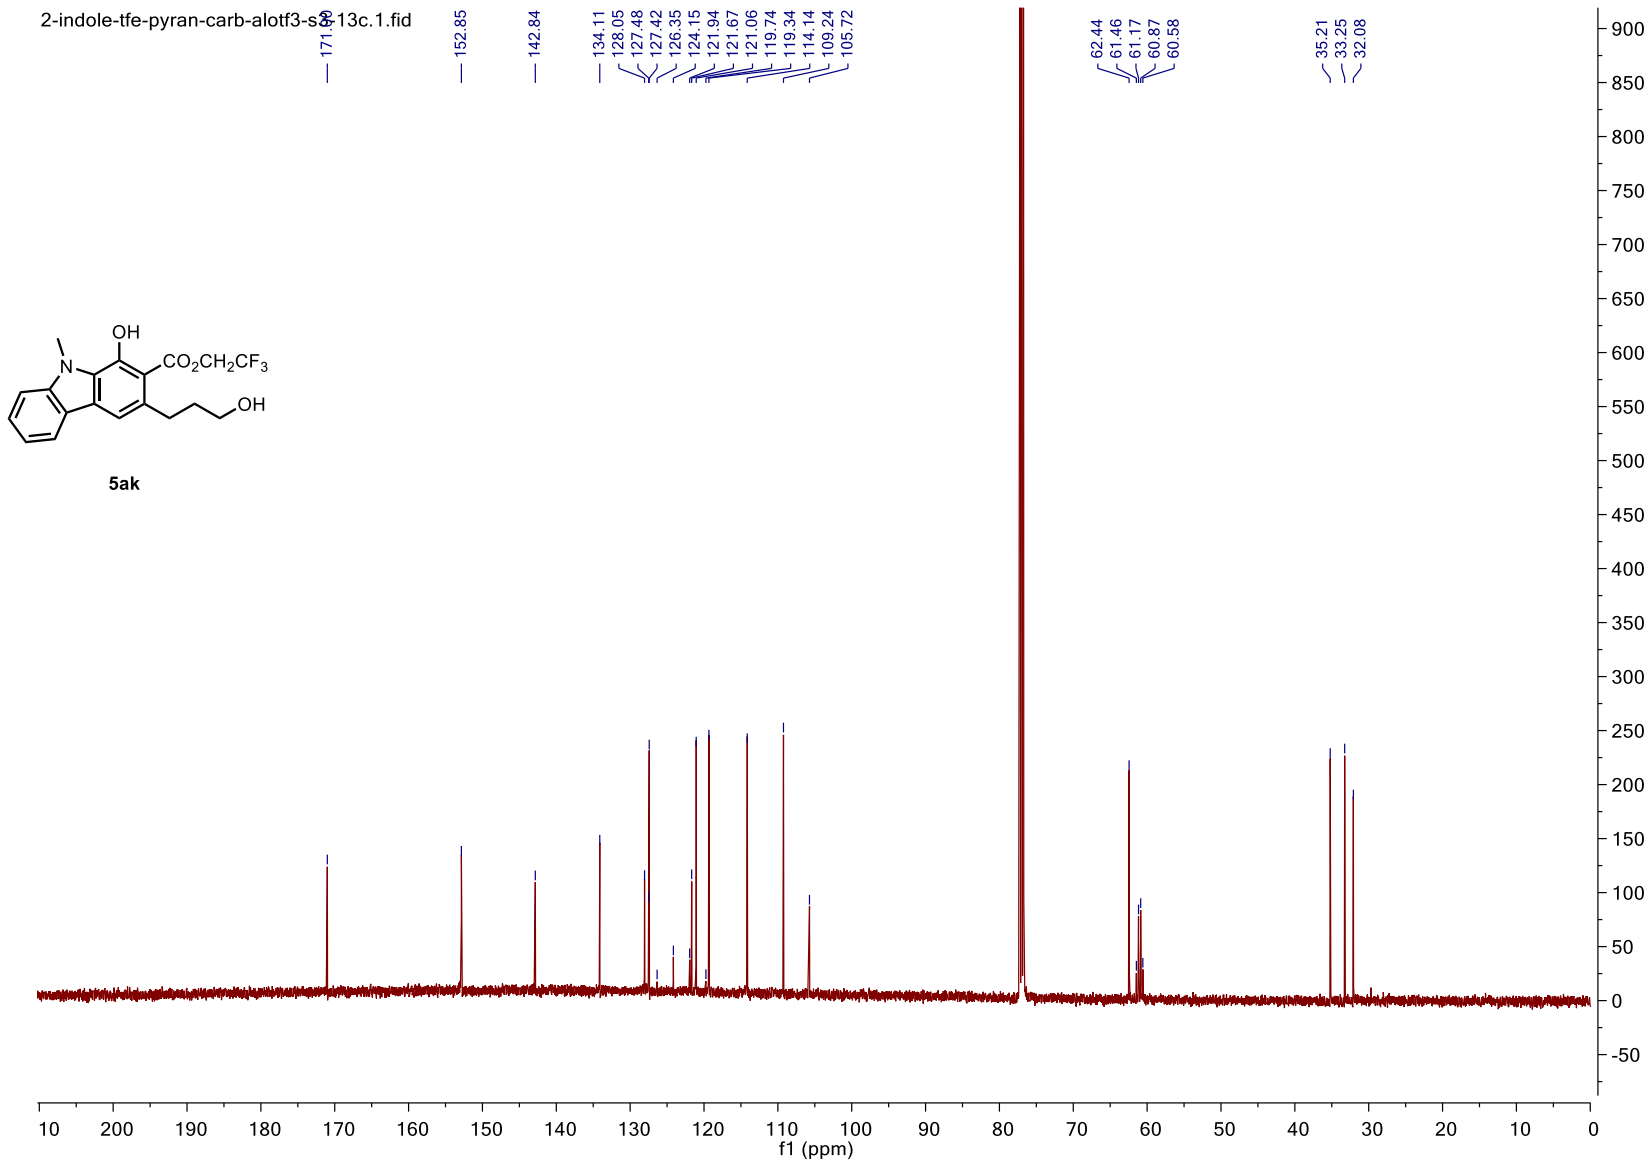



2-indole-trimethylfuran-carb-test2-s2.1.fid

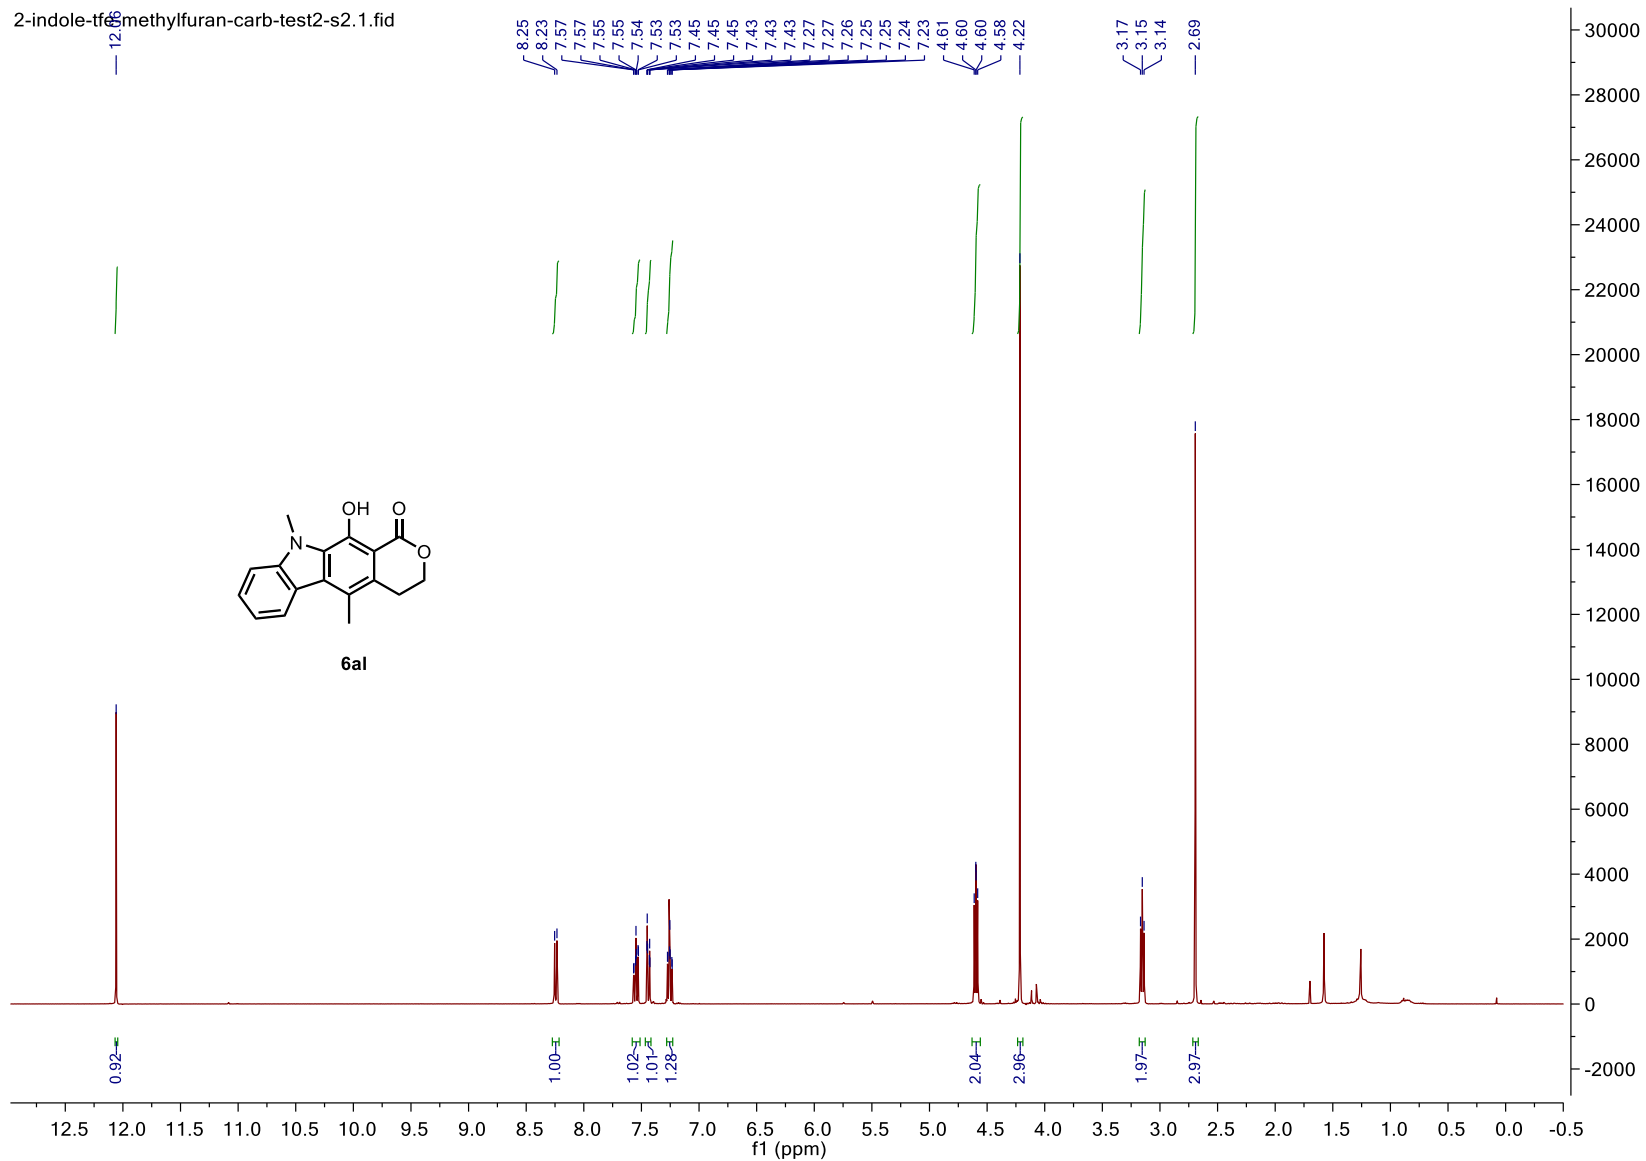

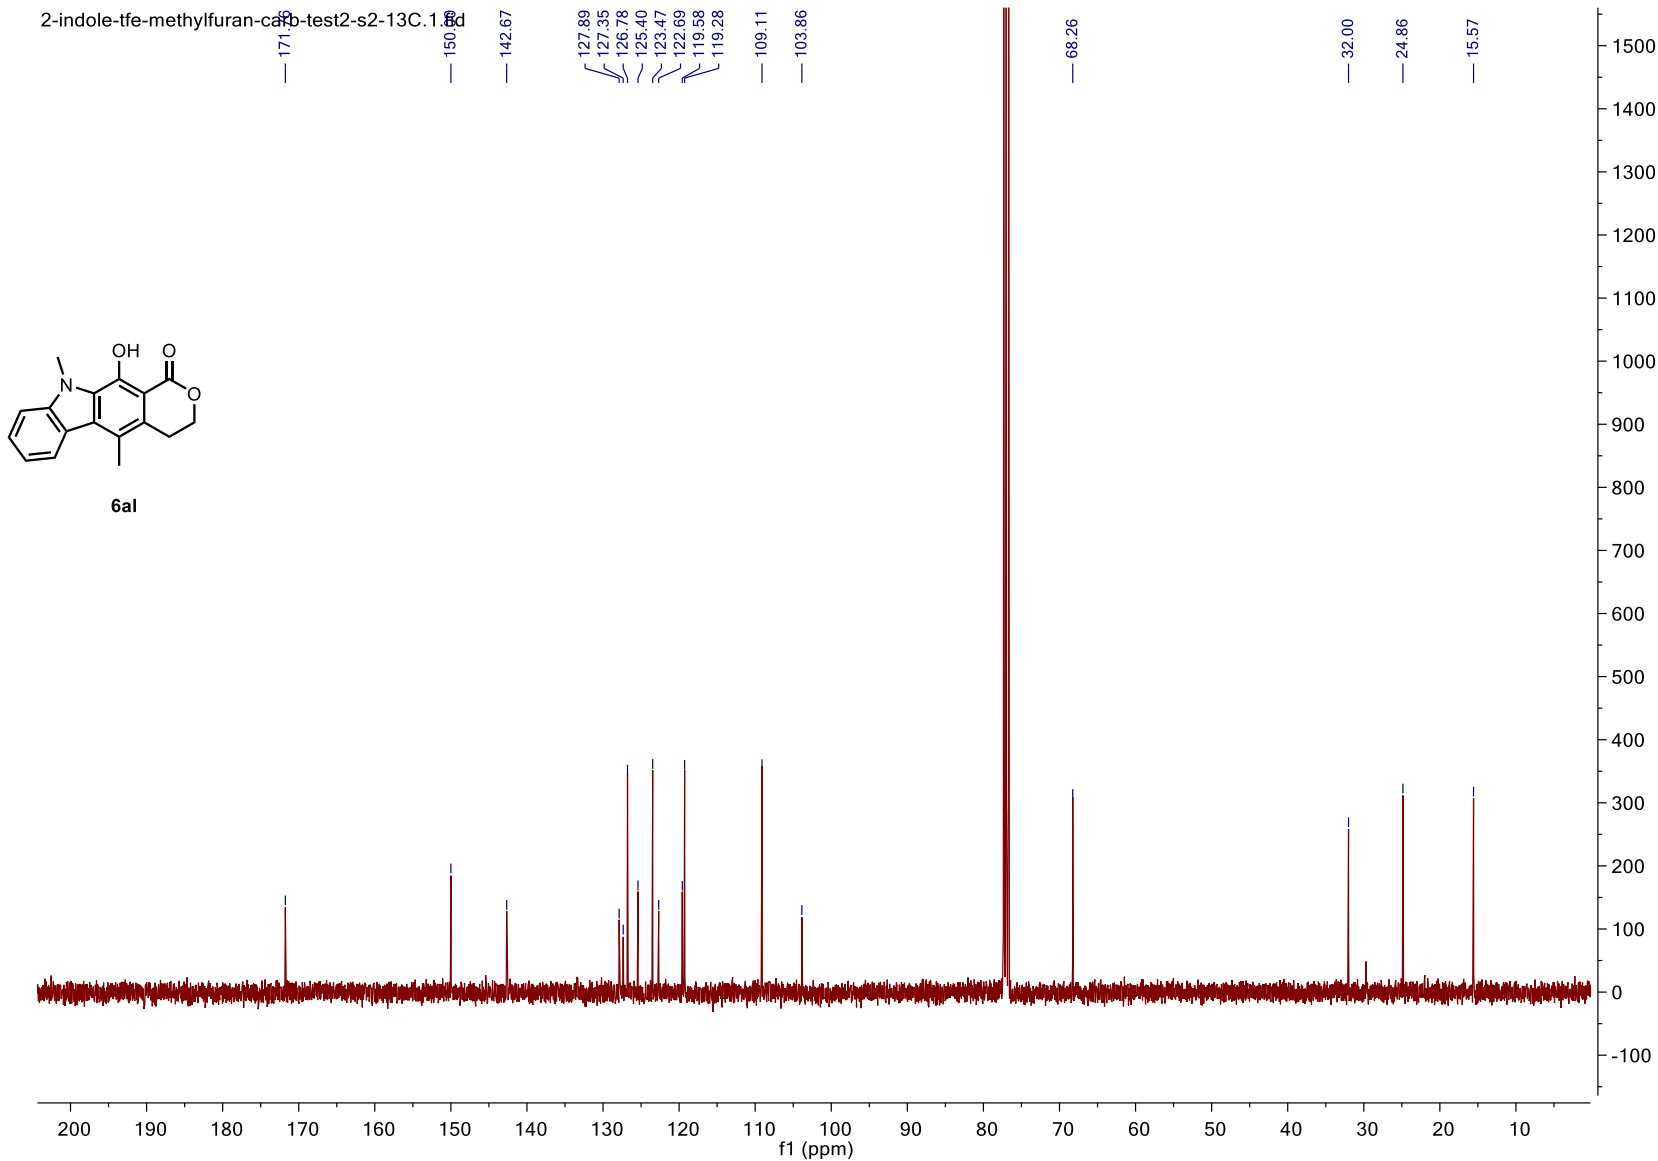

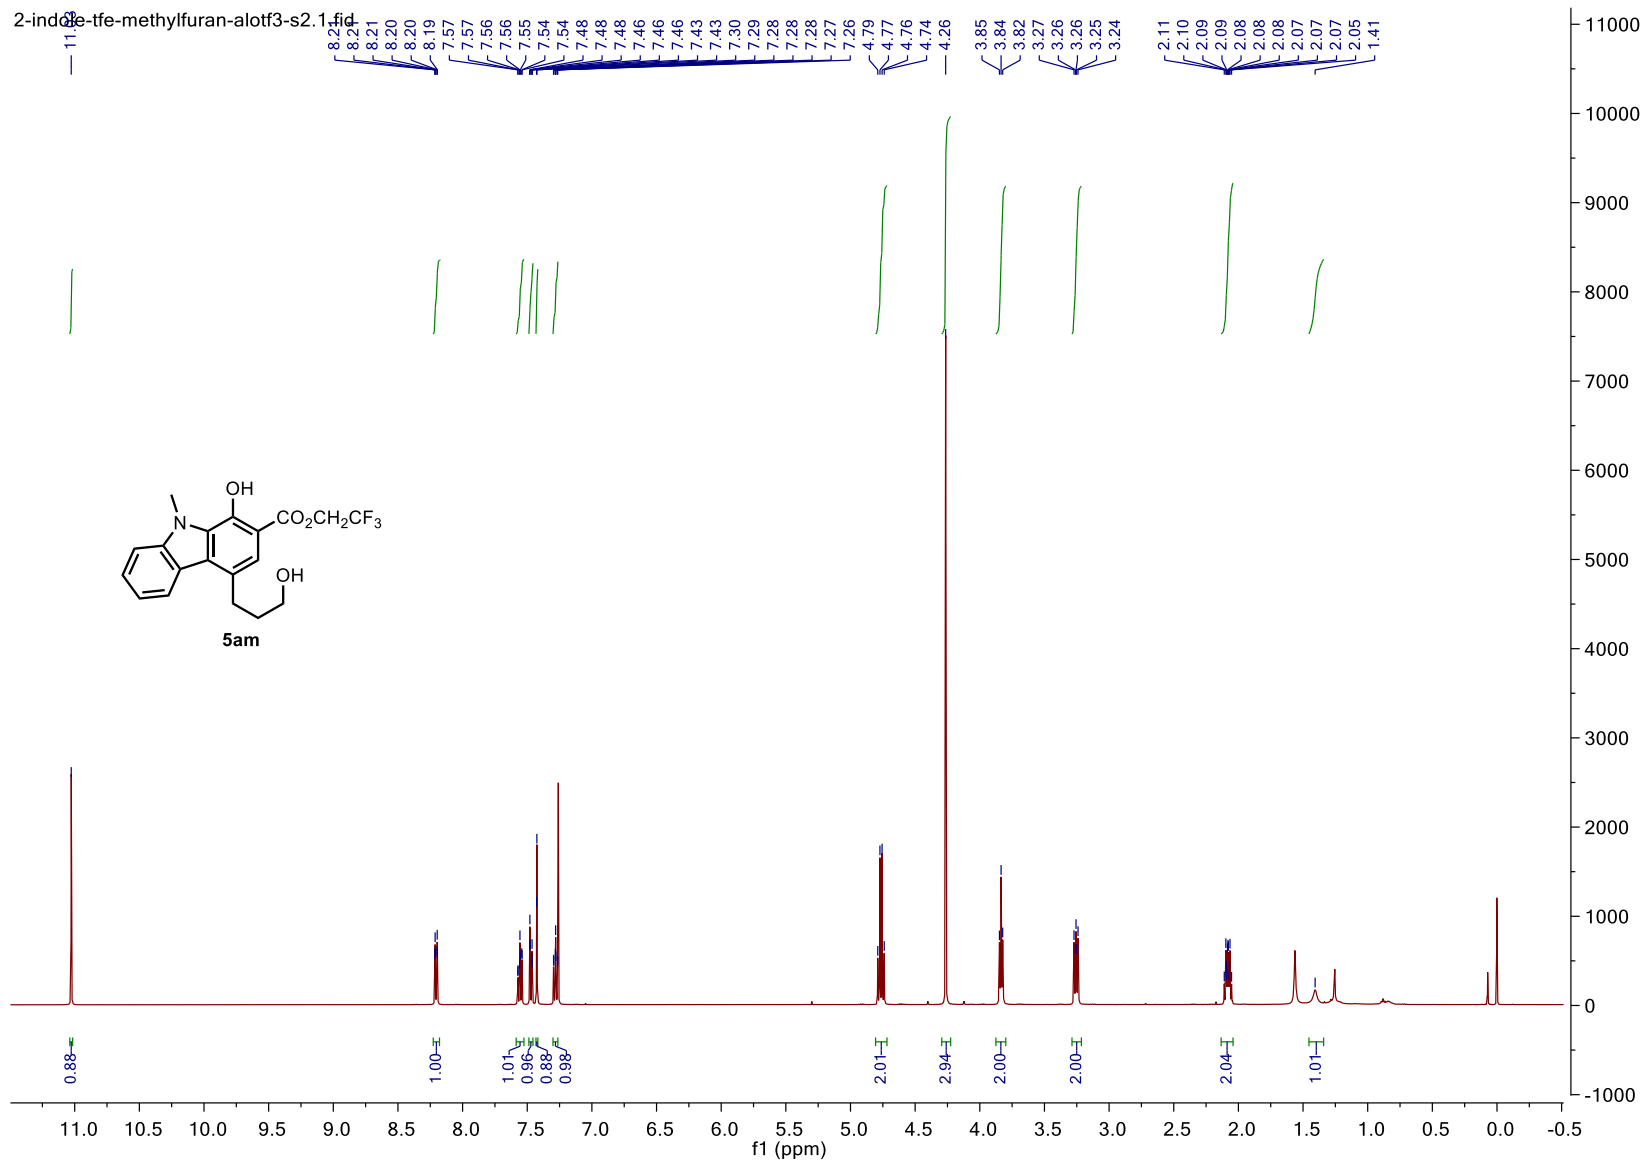

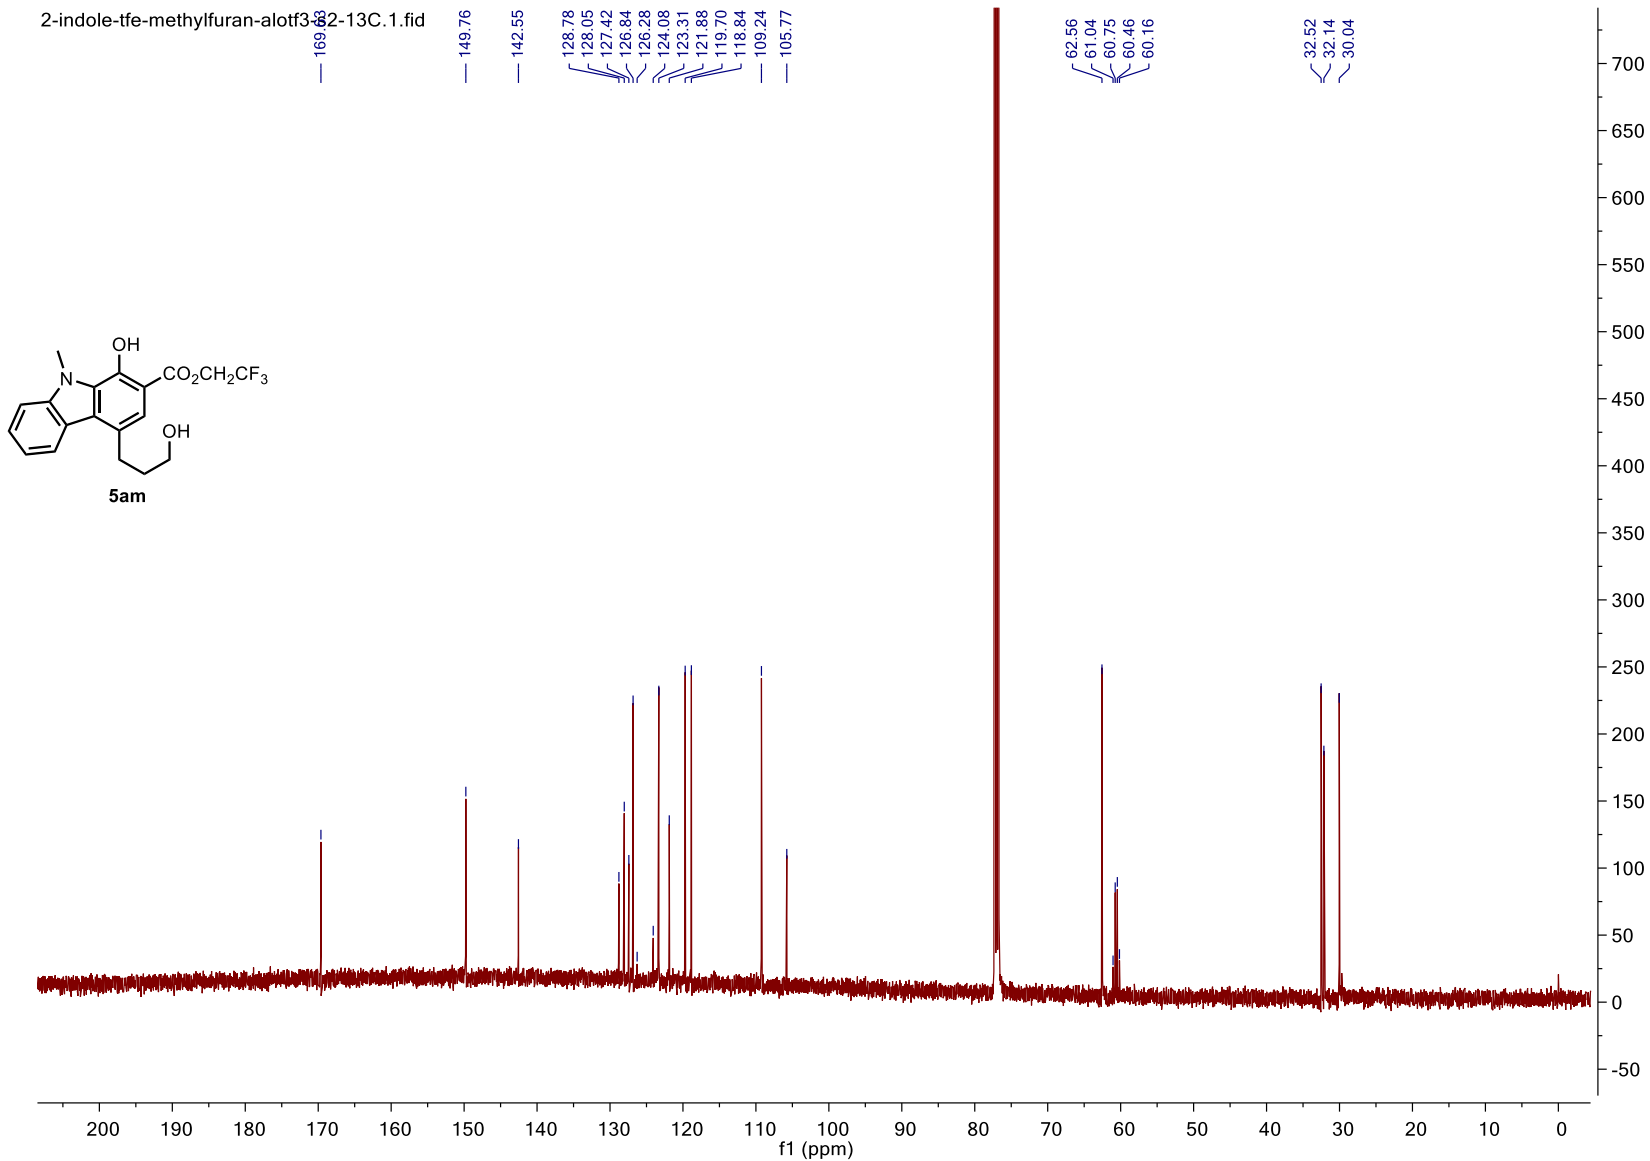

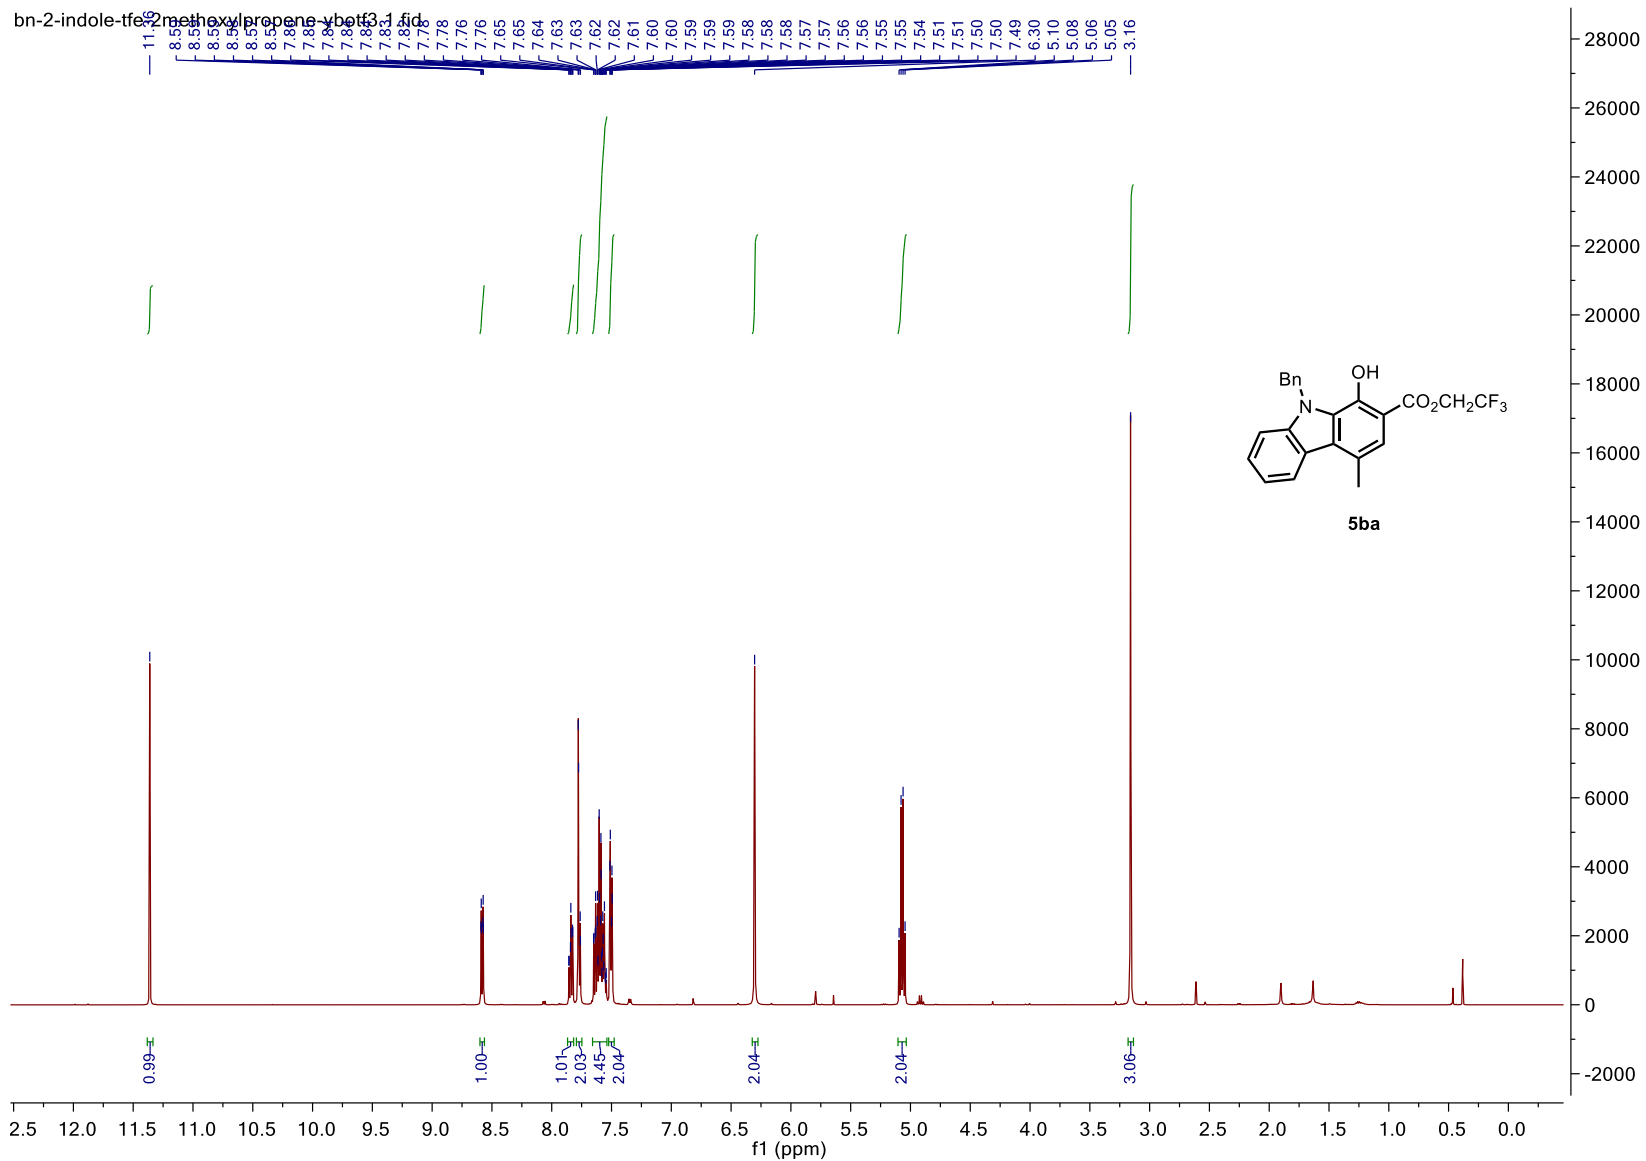

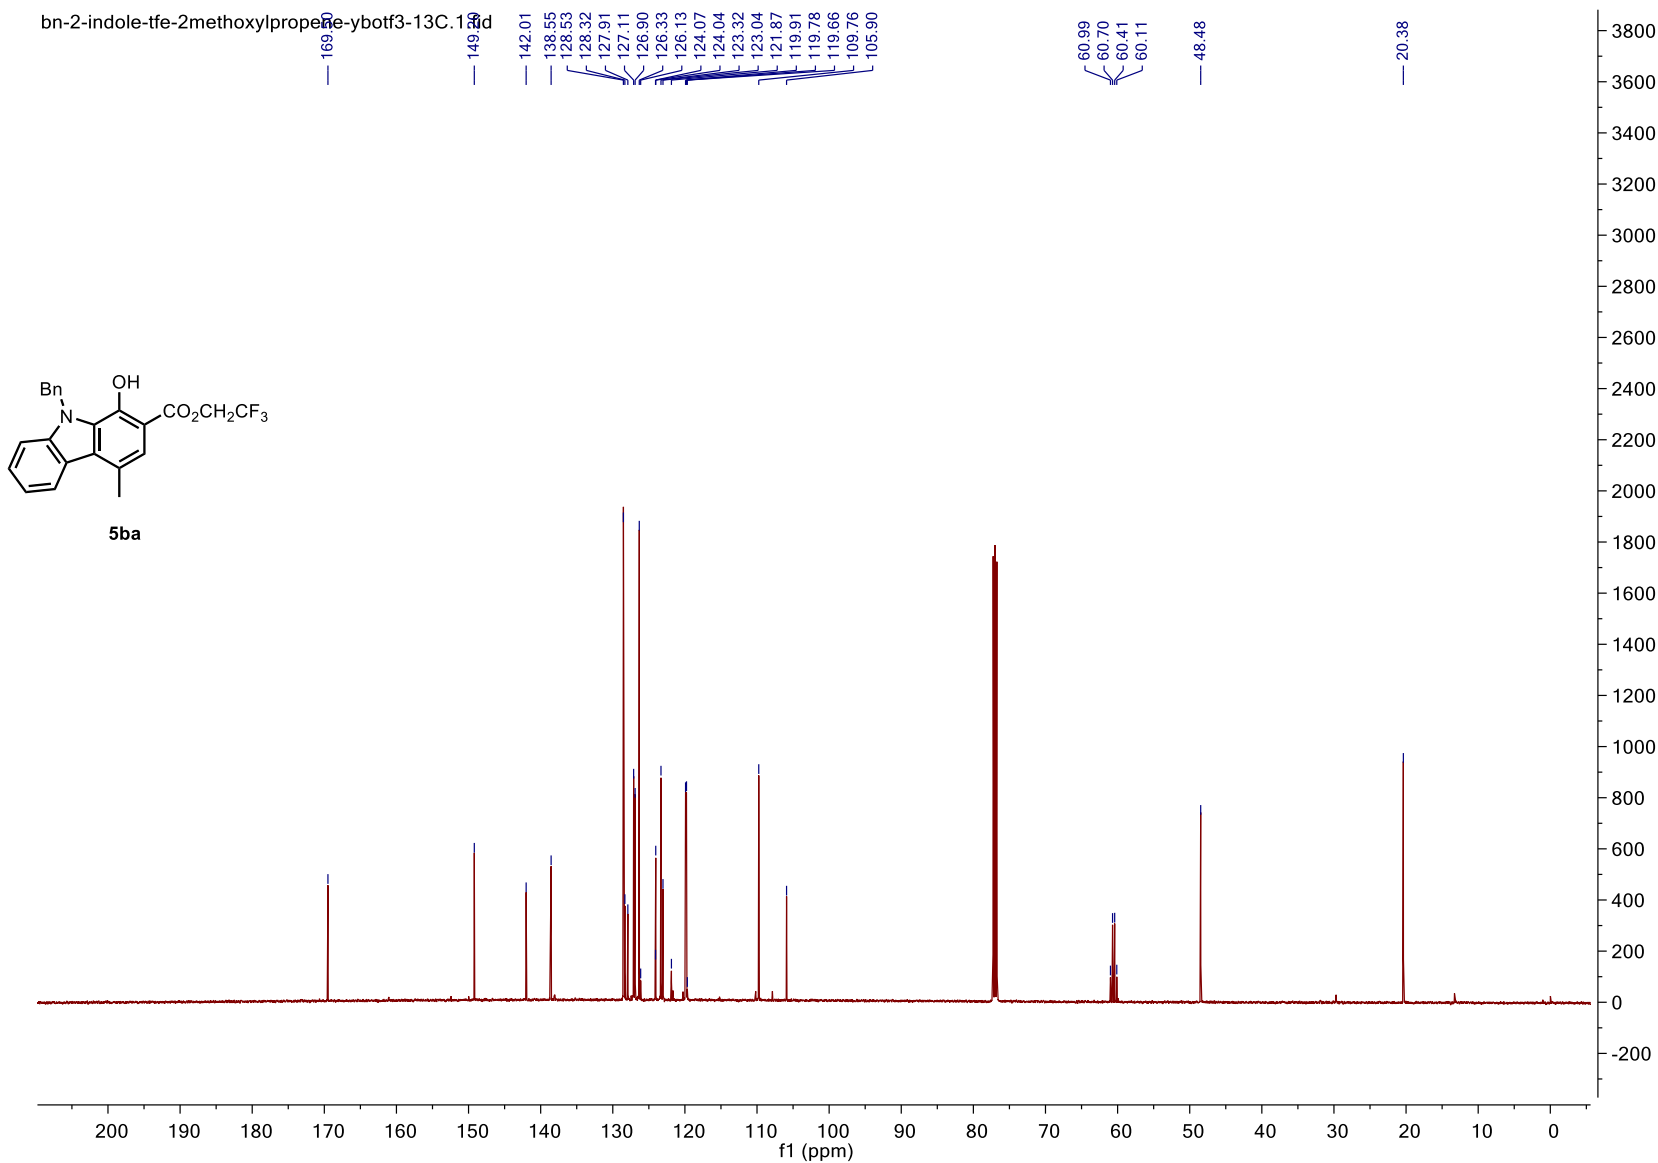

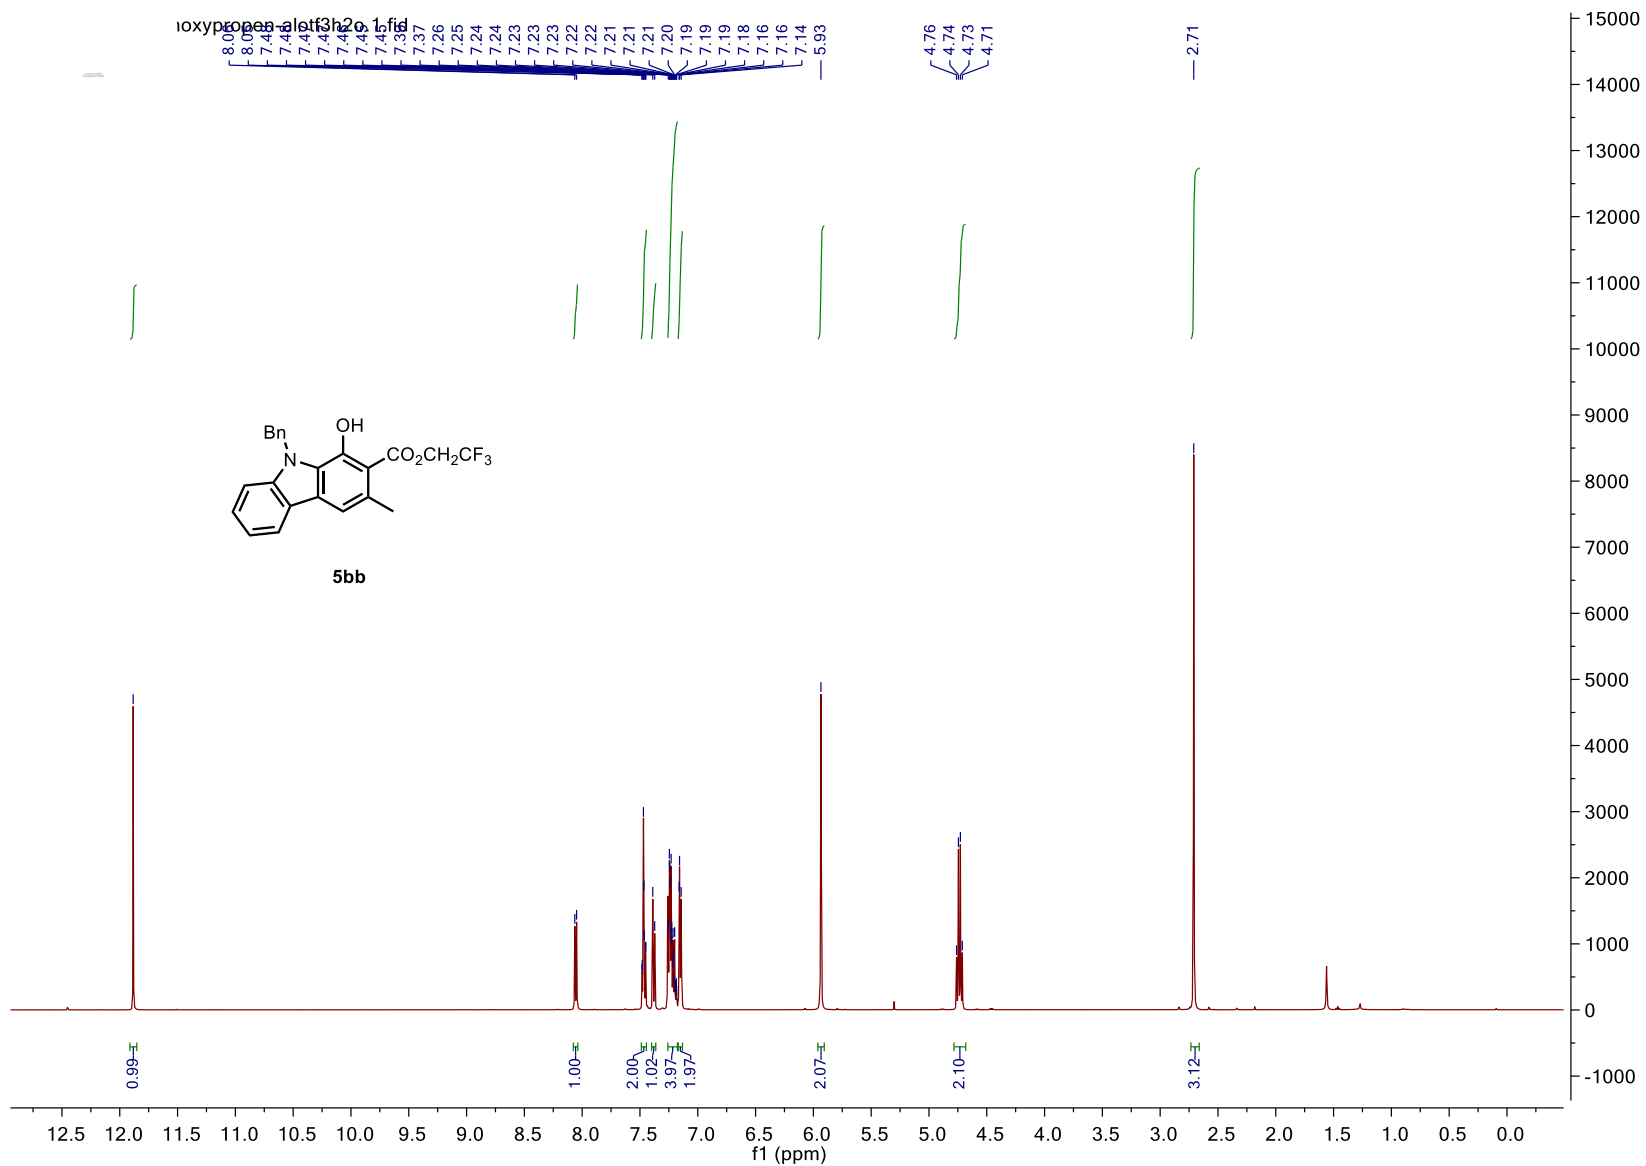

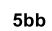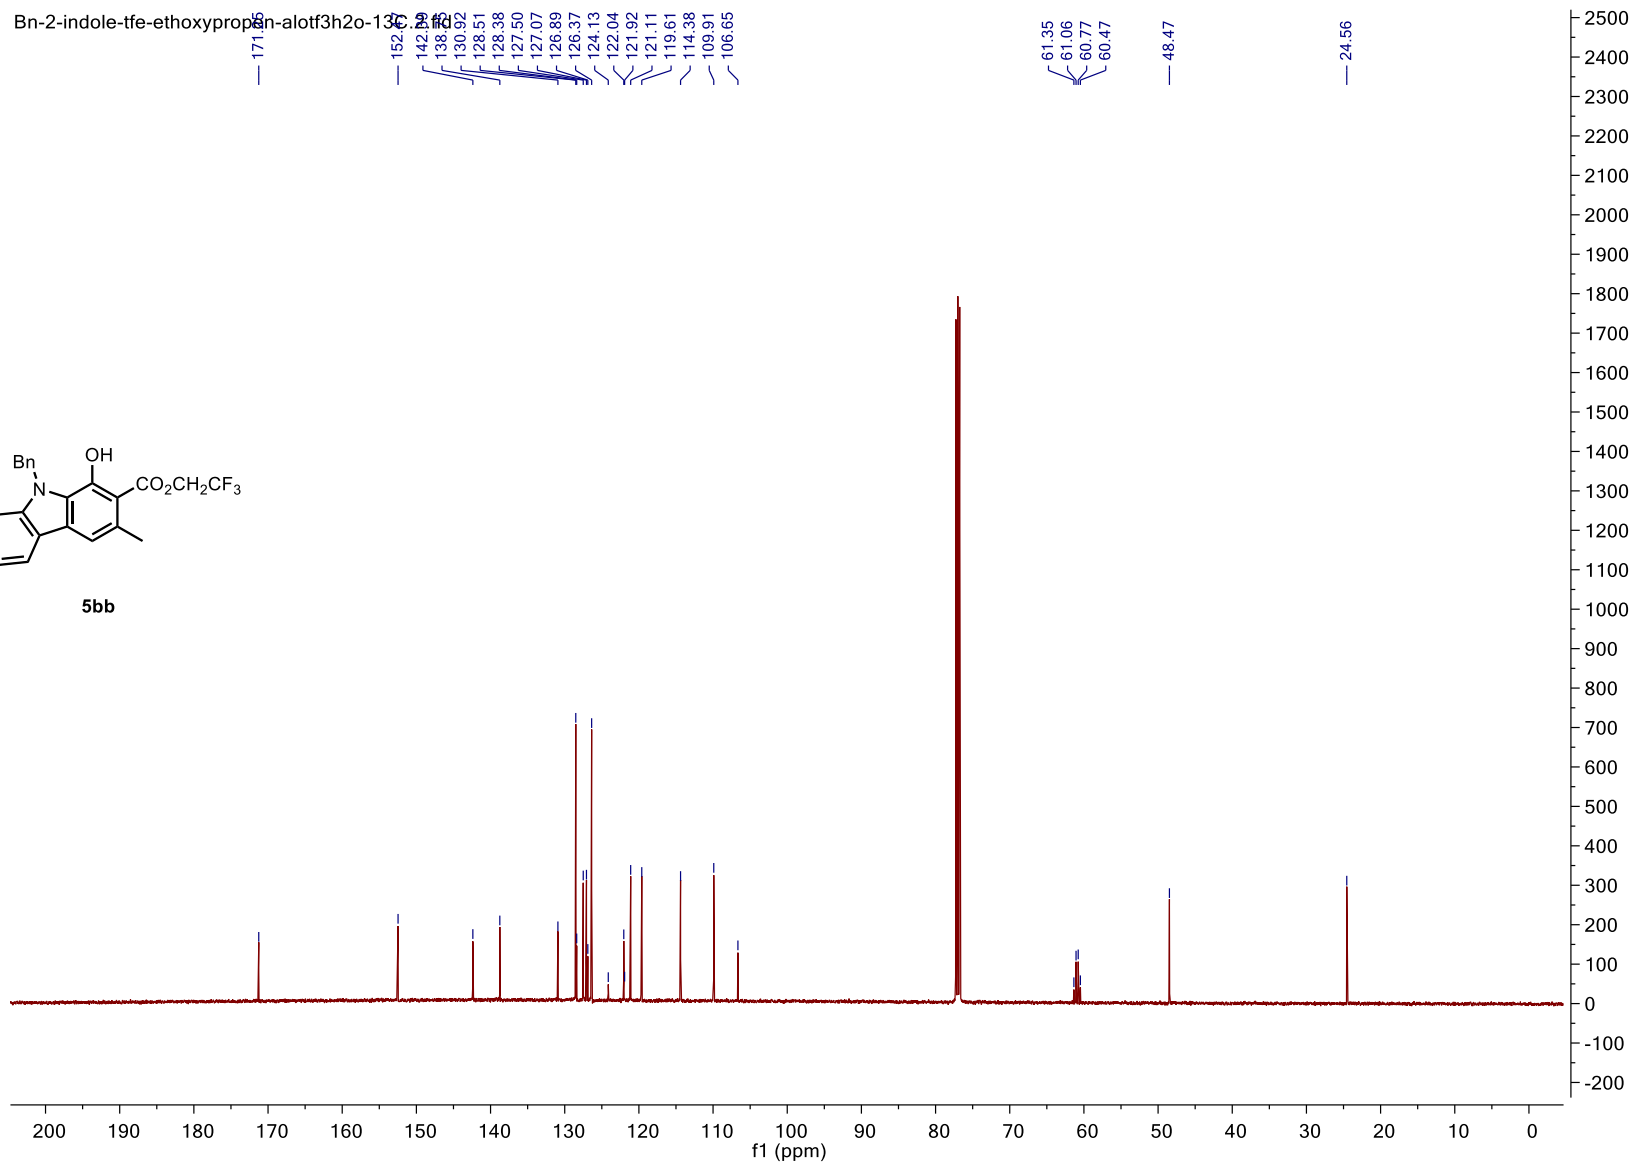



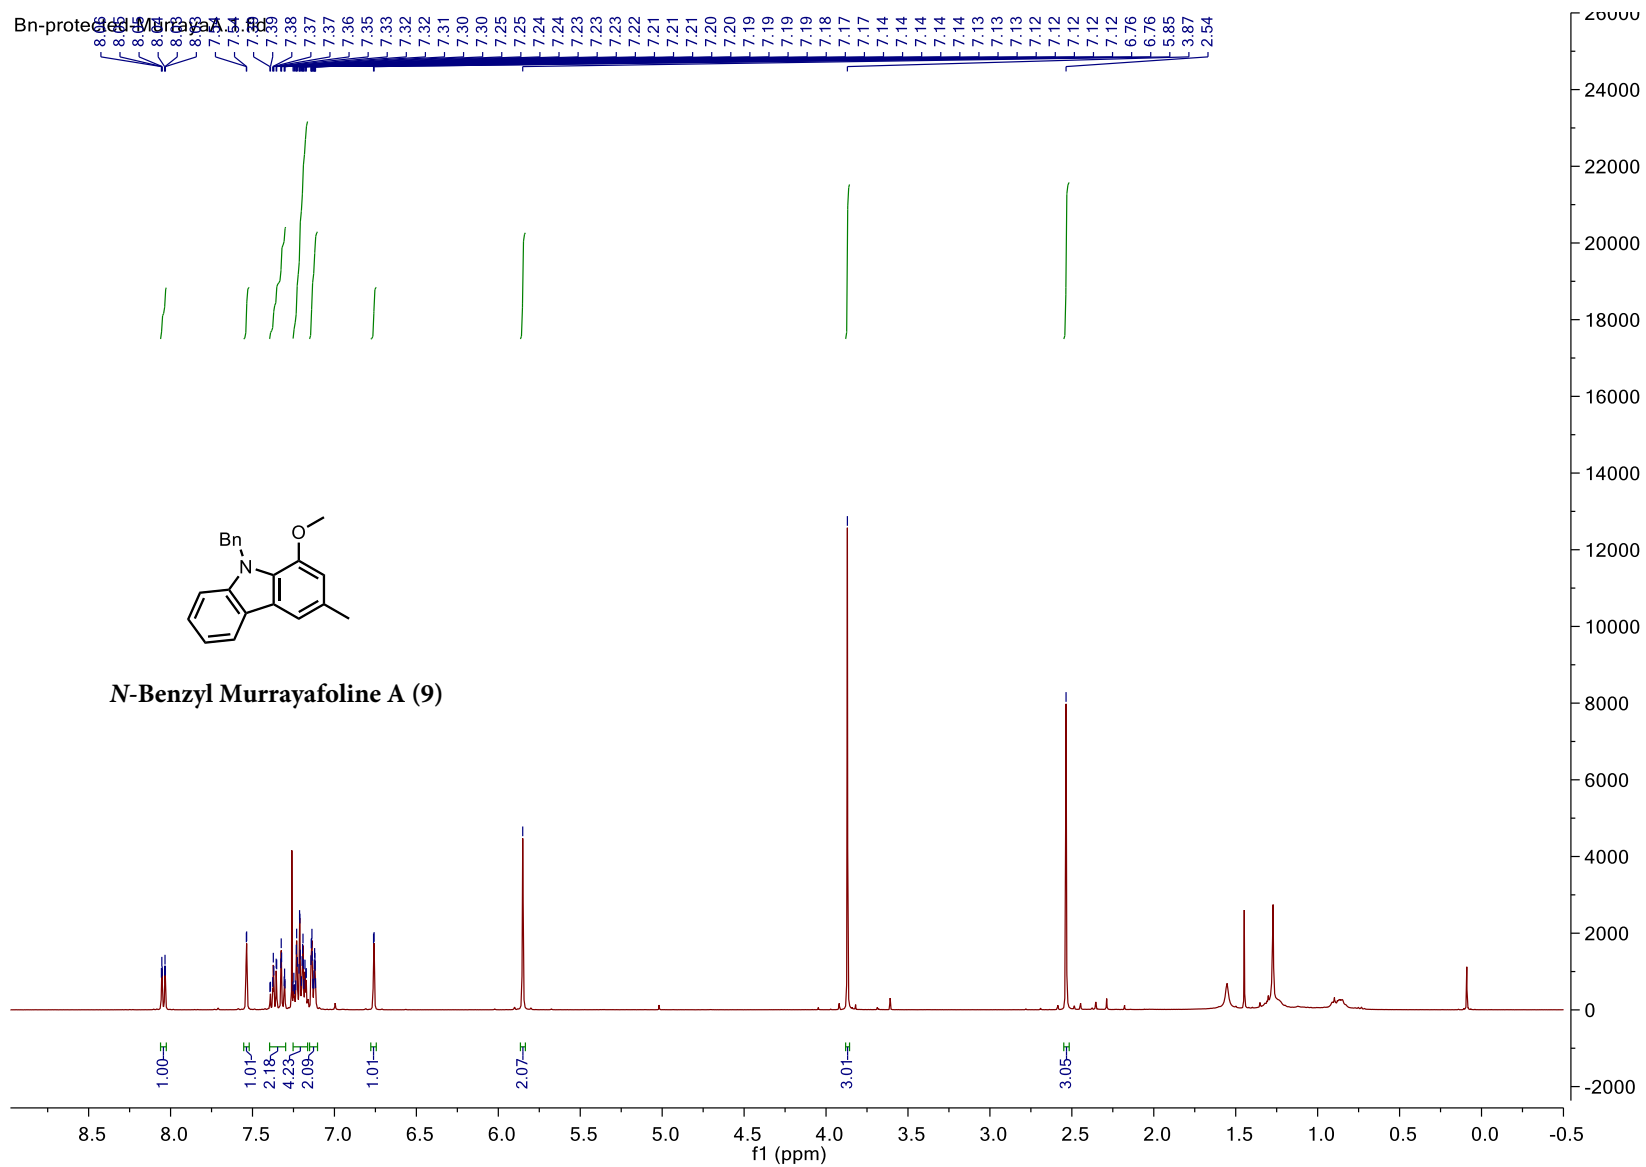

Supplement: s1 [file s1]
